# Supplementary material for: Photochemical synthesis and ring–chain–ring tautomerism of benzo[4,5]imidazo[1,2-a]cyclopenta[e]pyridines
Source: Royal Society of Chemistry journal article supplement (doi:10.1039/d3ob00273j), 2023-01-01
Supplement: d3ob00273j1.pdf [file d3ob00273j1.pdf]

Supporting Information

**Photochemical Synthesis and Ring-Chain-Ring  
Tautomerism of Benzo[4,5]imidazo[1,2-*a*]  
cyclopenta[*e*]pyridines**

Andrey N. Komogortsev\*, Boris V. Lichitskii, Constantine V. Milyutin and  
Valeriya G. Melekhina

N. D. Zelinsky Institute of Organic Chemistry, Russian Academy of Science, Leninsky Pr., 47,  
Moscow 119991, Russian Federation

## Table of content

|                                                                                                         |      |
|---------------------------------------------------------------------------------------------------------|------|
| 1. $^1\text{H}$ NMR spectra of mixture of compounds <b>4b</b> and <b>5b</b> at various conditions ..... | S3   |
| 2. UV-Vis absorption spectrum of compound <b>3b</b> .....                                               | S4   |
| 3. 2D NMR data of mixture of compounds <b>4a</b> and <b>5a</b> .....                                    | S5   |
| 4. Copies of $^1\text{H}$ and $^{13}\text{C}$ NMR spectra .....                                         | S8   |
| 4.1. Starting compounds <b>3</b> .....                                                                  | S8   |
| 4.2. Mixture of photoproducts <b>4</b> and <b>5</b> .....                                               | S13  |
| 4.3. Derivatization products <b>10-13</b> .....                                                         | S18  |
| 5. Copies of HRMS for all compounds .....                                                               | S26  |
| 6. X-ray crystallographic data and refinement details .....                                             | S44  |
| 6.1. Compound <b>4b</b> (1) .....                                                                       | S44  |
| 6.2. Compound <b>4b</b> (2) .....                                                                       | S56  |
| 6.3. Compound <b>4c</b> .....                                                                           | S68  |
| 6.4. Compound <b>10b</b> .....                                                                          | S79  |
| 6.5. Compound <b>11a</b> .....                                                                          | S87  |
| 6.6. Compound <b>12b</b> .....                                                                          | S96  |
| 6.7. Compound <b>13a</b> .....                                                                          | S104 |
| 7. References .....                                                                                     | S111 |

# 1. <sup>1</sup>H NMR spectra of mixture of compounds **4b** and **5b** at various conditions

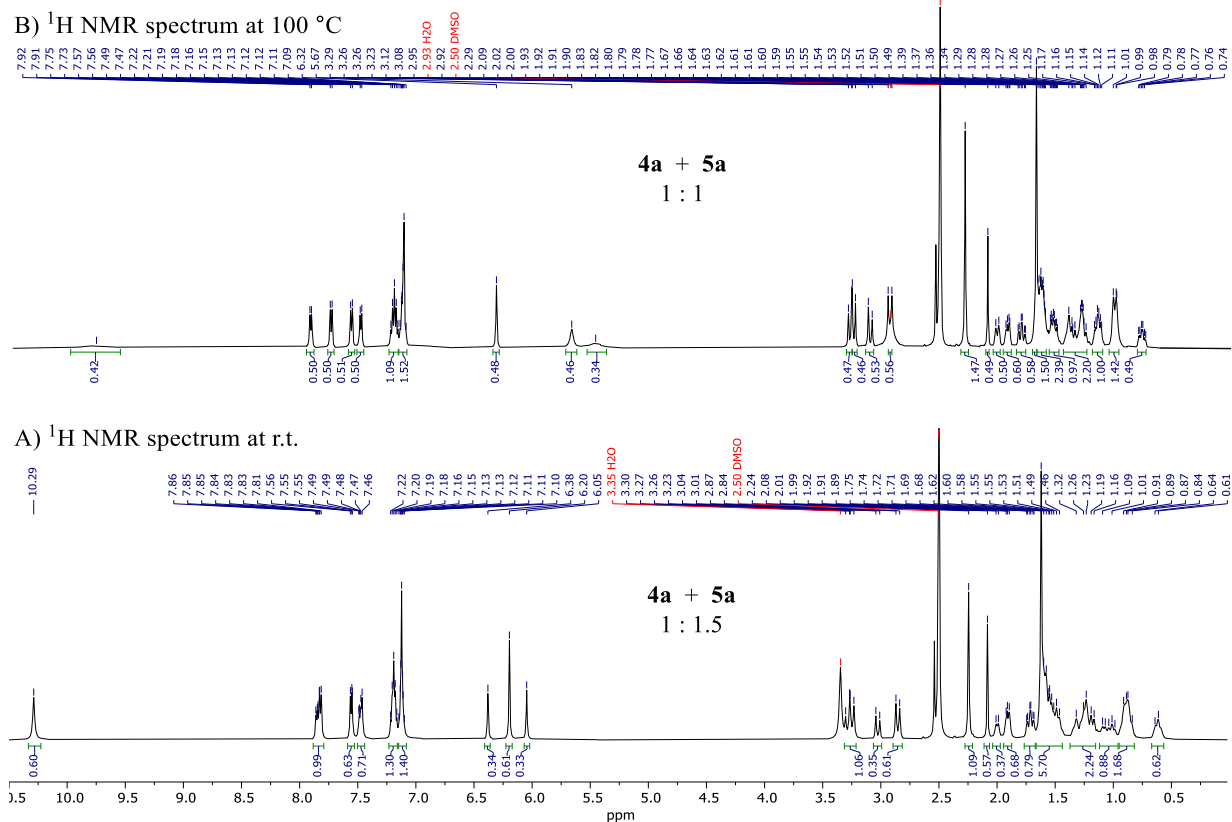

**Figure S1.** <sup>1</sup>H NMR spectra of mixture of compounds **4b** and **5b** at r.t. and 100 °C in DMSO-*d*<sub>6</sub> solution

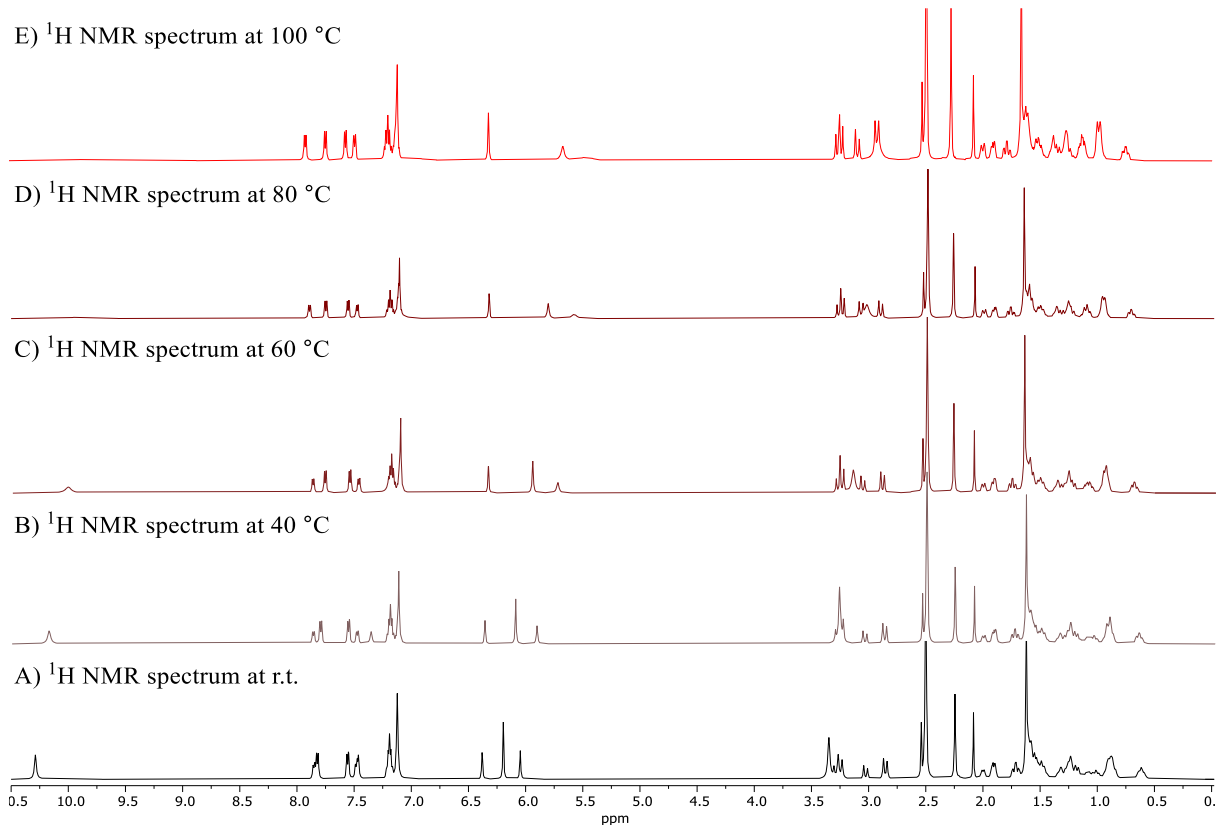

**Figure S2.** <sup>1</sup>H NMR spectra of mixture of compounds **4b** and **5b** at various T °C in DMSO-*d*<sub>6</sub> solution

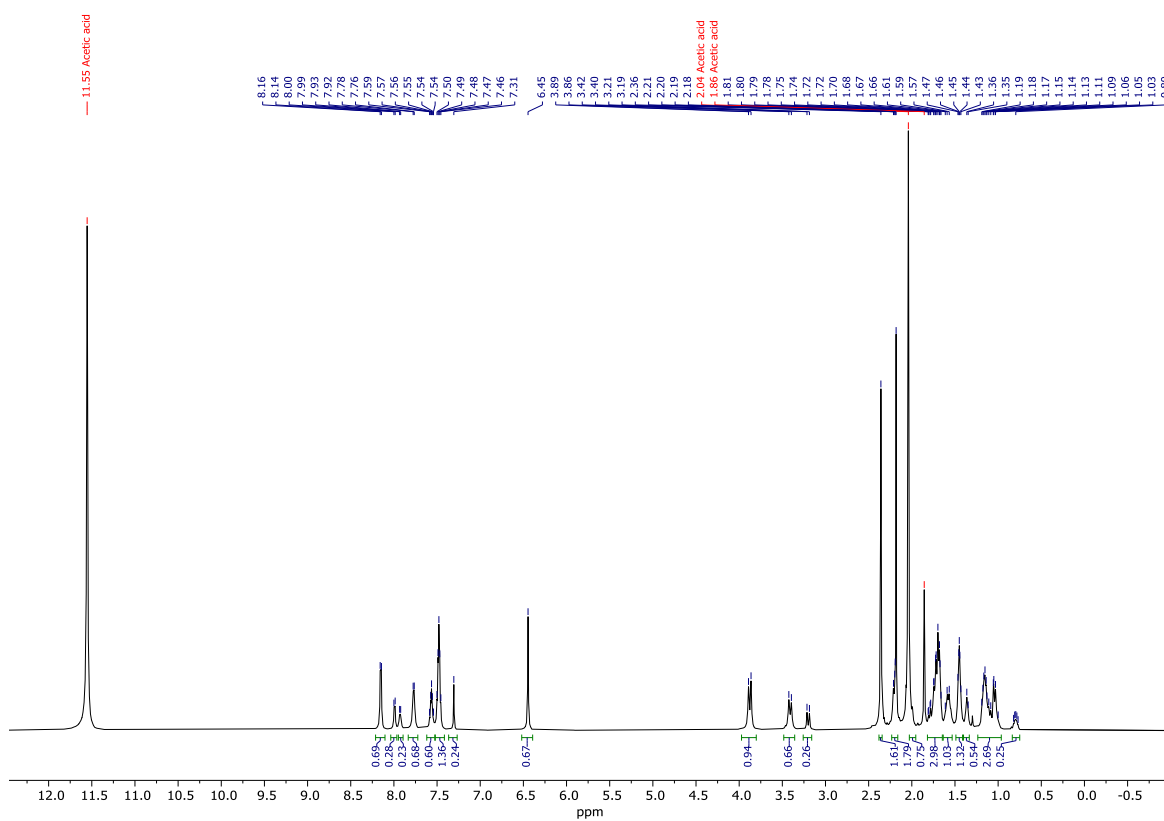

**Figure S3.**  $^1\text{H}$  NMR spectra of mixture of compounds **4b** and **5b** at r.t. in Acetic acid- $d_4$  solution

## 2. UV-Vis absorption spectrum of compound **3b**

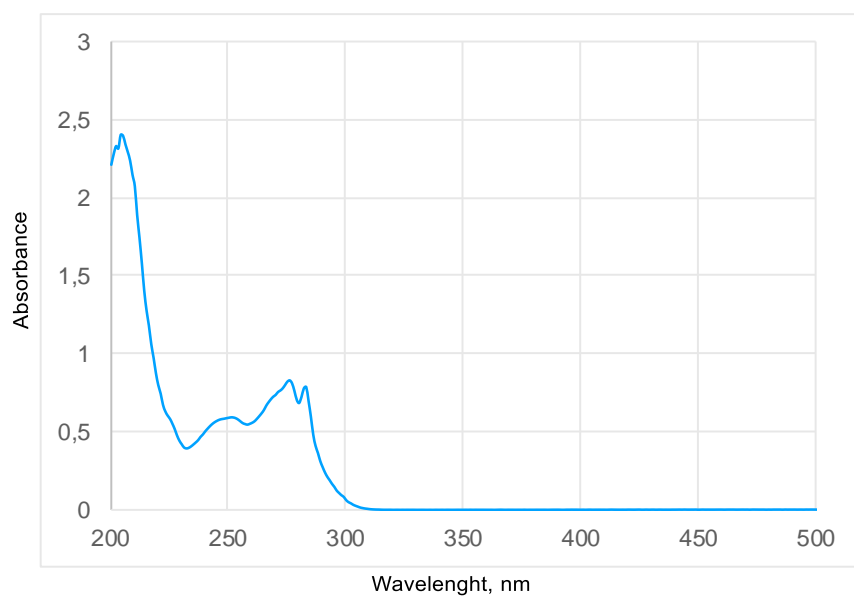

**Fig. S4.** UV-Vis absorption spectrum of **3b** in acetonitrile ( $c = 1.1 \times 10^{-5}$ )

### 3. 2D NMR data of mixture of compounds **4a** and **5a**

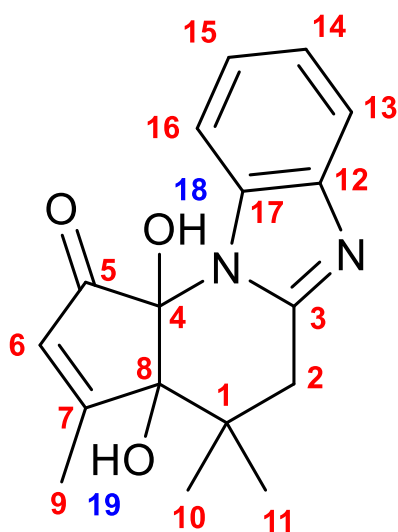

**Table S1.** Assignment of NMR signals and 2D NMR (HMBC) correlations for compound **4a**

| №  | <sup>1</sup> H                                                         | <sup>13</sup> C | HMBC            |
|----|------------------------------------------------------------------------|-----------------|-----------------|
| 1  | -                                                                      | 38.5            | 19, 2, 10, 11   |
| 2  | 3.23 (d, <i>J</i> = 16.5 Hz, 1H);<br>2.62 (d, <i>J</i> = 16.5 Hz, 1H); | 35.0            | 10, 11          |
| 3  | -                                                                      | 150.8           | 2, 11           |
| 4  | -                                                                      | 87.8            | 6               |
| 5  | -                                                                      | 197.1           | 6, 9            |
| 6  | 6.35 (d, <i>J</i> = 1.5 Hz, 1H)                                        | 129.5           | 9               |
| 7  | -                                                                      | 175.6           | 6, 9            |
| 8  | -                                                                      | 83.1            | 2, 6, 9, 10, 11 |
| 9  | 2.21 (d, <i>J</i> = 1.5 Hz, 3H)                                        | 16.8            | 6               |
| 10 | 0.66 (s, 3H)                                                           | 24.0            | 2, 11           |
| 11 | 1.29 (s, 3H)                                                           | 25.0            | 10              |
| 12 | -                                                                      | 143.0           | 13, 14          |
| 13 | 7.91 – 7.81 (m, 1H)                                                    | 115.5           | 14, 15          |
| 14 | 7.17 – 7.09 (m, 1H)                                                    | 121.6           | 13              |
| 15 | 7.17 – 7.09 (m, 1H)                                                    | 120.9           | 16              |
| 16 | 7.51 – 7.44 (m, 2H)                                                    | 117.9           | 14, 15          |
| 17 | -                                                                      | 133.8           | 15, 16          |
| 18 | 7.48 (s, 1H)                                                           | -               | -               |
| 19 | 6.08 (s, 1H)                                                           | -               | -               |

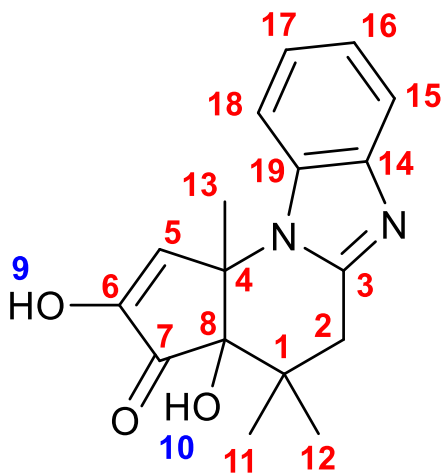

Table S2. Assignment of NMR signals and 2D NMR (HMBC) correlations for compound 5a

| No | <sup>1</sup> H                                                     | <sup>13</sup> C | HMBC                 |
|----|--------------------------------------------------------------------|-----------------|----------------------|
| 1  | -                                                                  | 38.4            | 2, 10, 11, 12        |
| 2  | 3.11 (d, <i>J</i> = 16 Hz, 1H)<br>2.56 (d, <i>J</i> = 17.1 Hz, 1H) | 34.3            | 11, 12               |
| 3  | -                                                                  | 150.6           | 2                    |
| 4  | -                                                                  | 63.7            | 5, 10, 13            |
| 5  | 7.17 – 7.09 (m, 1H)                                                | 127.4           | 13                   |
| 6  | -                                                                  | 152.8           | -                    |
| 7  | -                                                                  | 202.0           | 5, 10                |
| 8  | -                                                                  | 81.4            | 2, 5, 10, 11, 12, 13 |
| 9  | 10.3 (br.s, 1H)                                                    | -               | -                    |
| 10 | 6.23 (s, 1H)                                                       | -               | -                    |
| 11 | 1.22 (s, 3H)                                                       | 22.6            | 12                   |
| 12 | 0.56 (s, 3H)                                                       | 25.0            | 11                   |
| 13 | 1.62 (s, 3H)                                                       | 26.7            | 5                    |
| 14 | -                                                                  | 143.2           | 2, 15, 16            |
| 15 | 7.91 – 7.81 (m, 1H)                                                | 112.0           | 16, 18               |
| 16 | 7.26 – 7.19 (m, 1H)                                                | 121.5           | 15, 17, 18           |
| 17 | 7.17 – 7.09 (m, 1H)                                                | 121.4           | 15, 18               |
| 18 | 7.59 – 7.54 (m, 1H)                                                | 118.8           | 16                   |
| 19 | -                                                                  | 132.1           | 18, 16               |

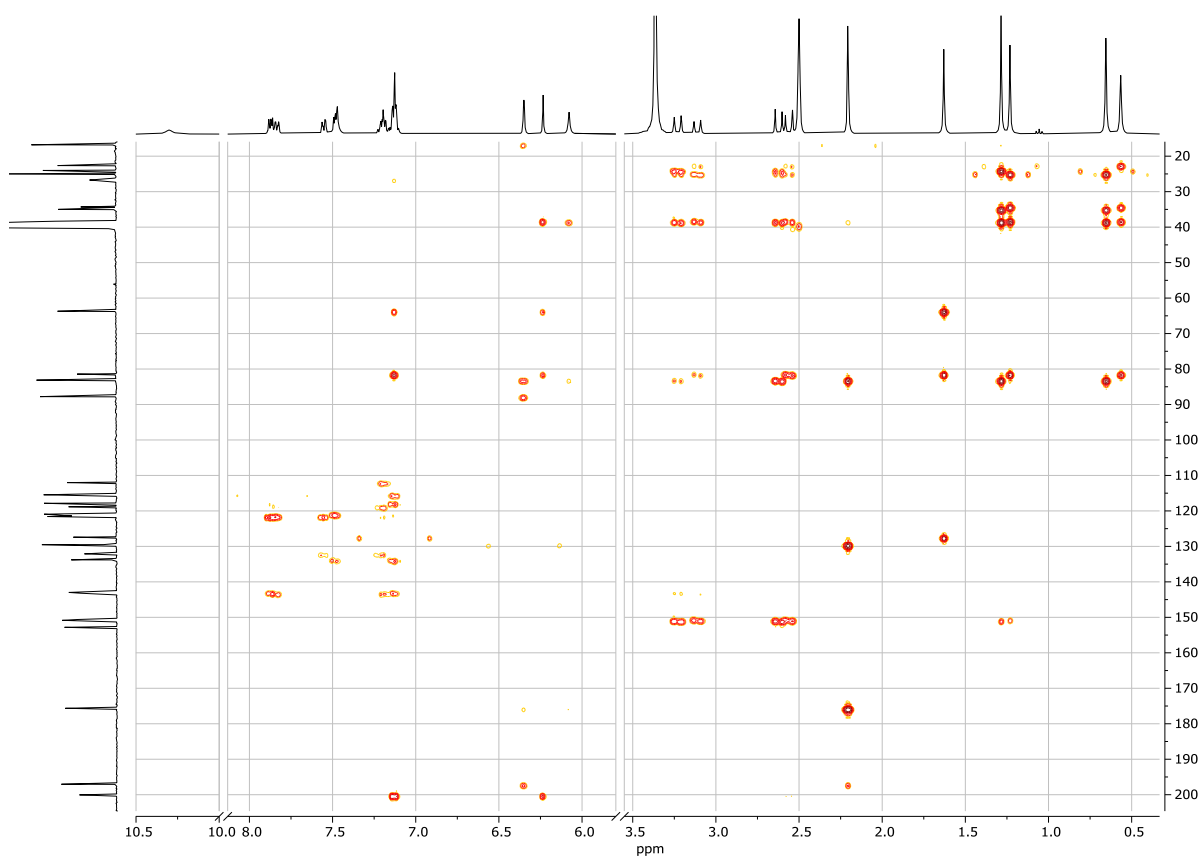

**Figure S5.** 2D NMR spectrum (HMBC) of mixture of **4a** and **5a** in DMSO-*d*<sub>6</sub>

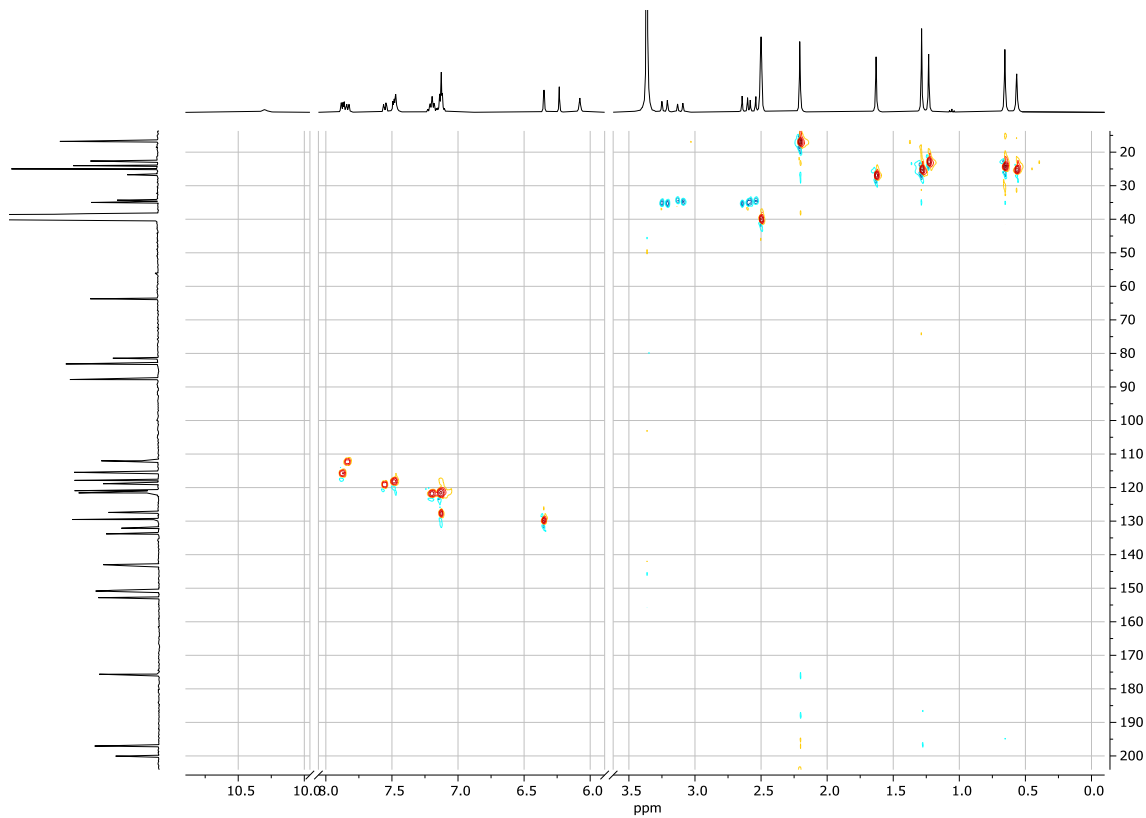

**Figure S6.** 2D NMR spectrum (HSQC) of mixture of **4a** and **5a** in DMSO-*d*<sub>6</sub>

## 4. Copies of $^1\text{H}$ and $^{13}\text{C}$ NMR spectra

### 4.1. Starting compounds **3**

$^1\text{H}$  NMR spectrum (300 MHz) of **3a** in  $\text{DMSO-}d_6$

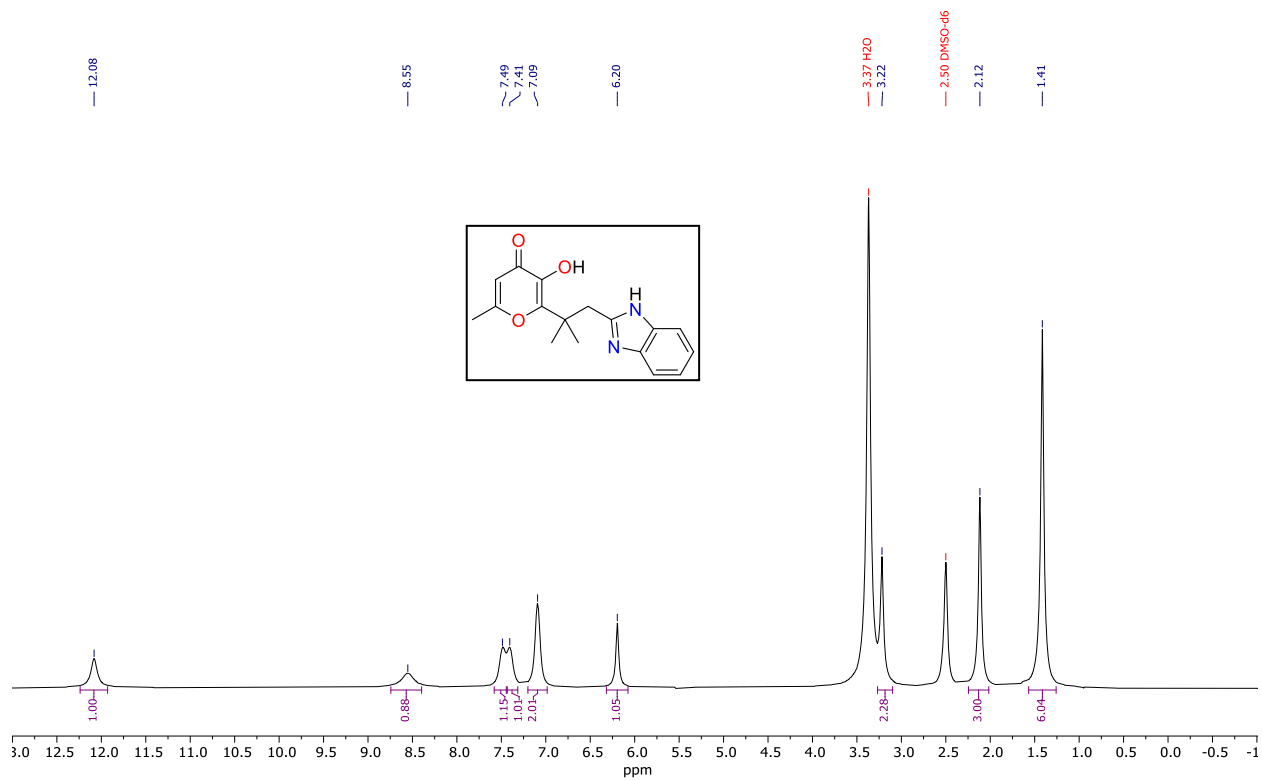

$^{13}\text{C}$   $\{^1\text{H}\}$  NMR spectrum (75 MHz) of **3a** in  $\text{DMSO-}d_6$

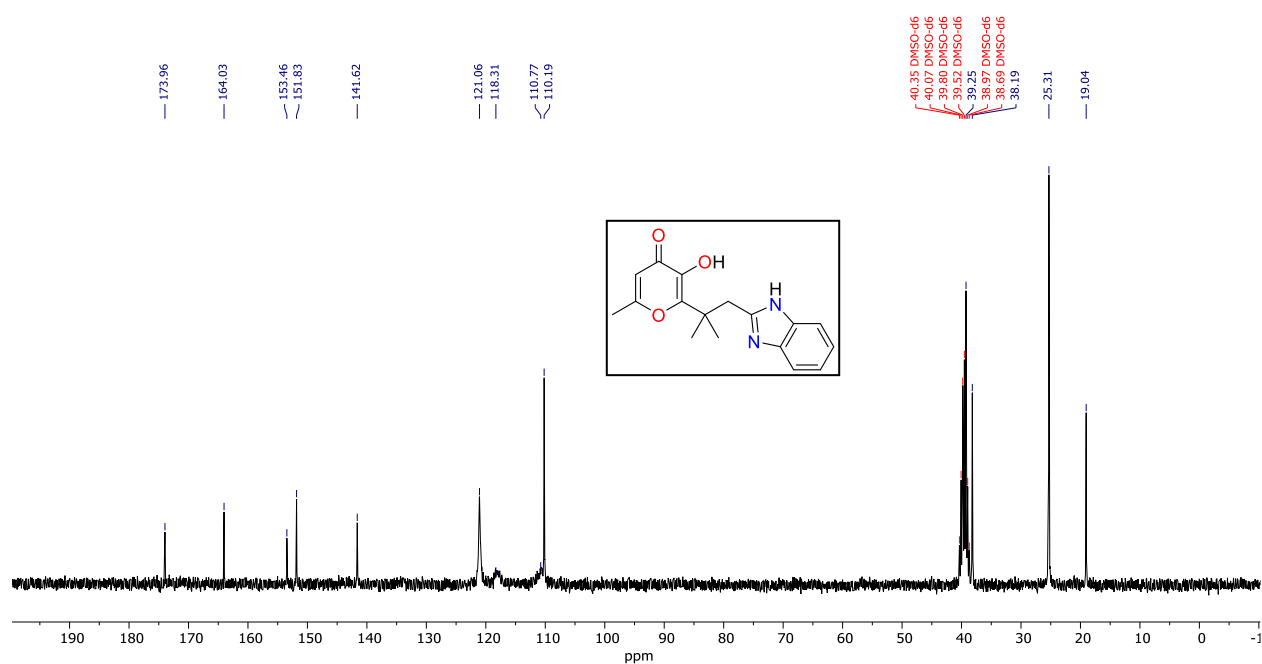



$^1\text{H}$  NMR spectrum (500 MHz) of **3b** in  $\text{DMSO-}d_6$

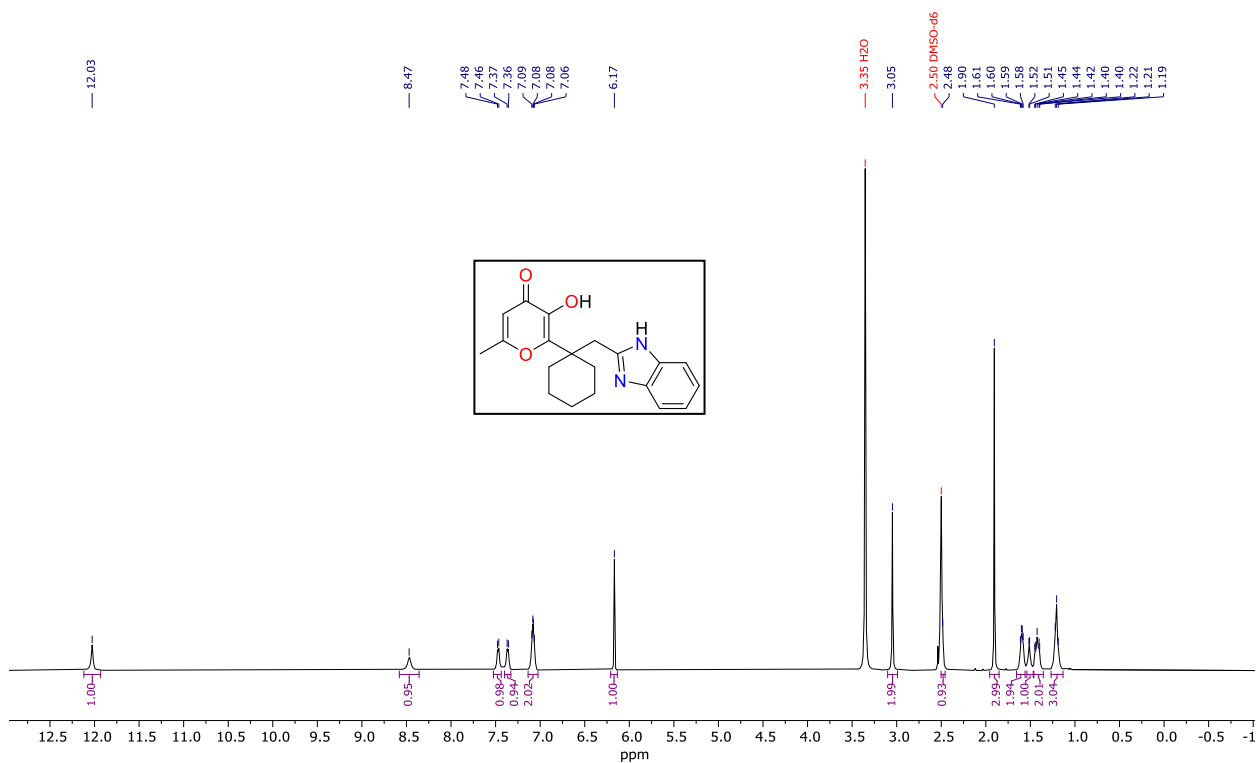

$^{13}\text{C}$   $\{^1\text{H}\}$  NMR spectrum (126 MHz) of **3b** in  $\text{DMSO-}d_6$

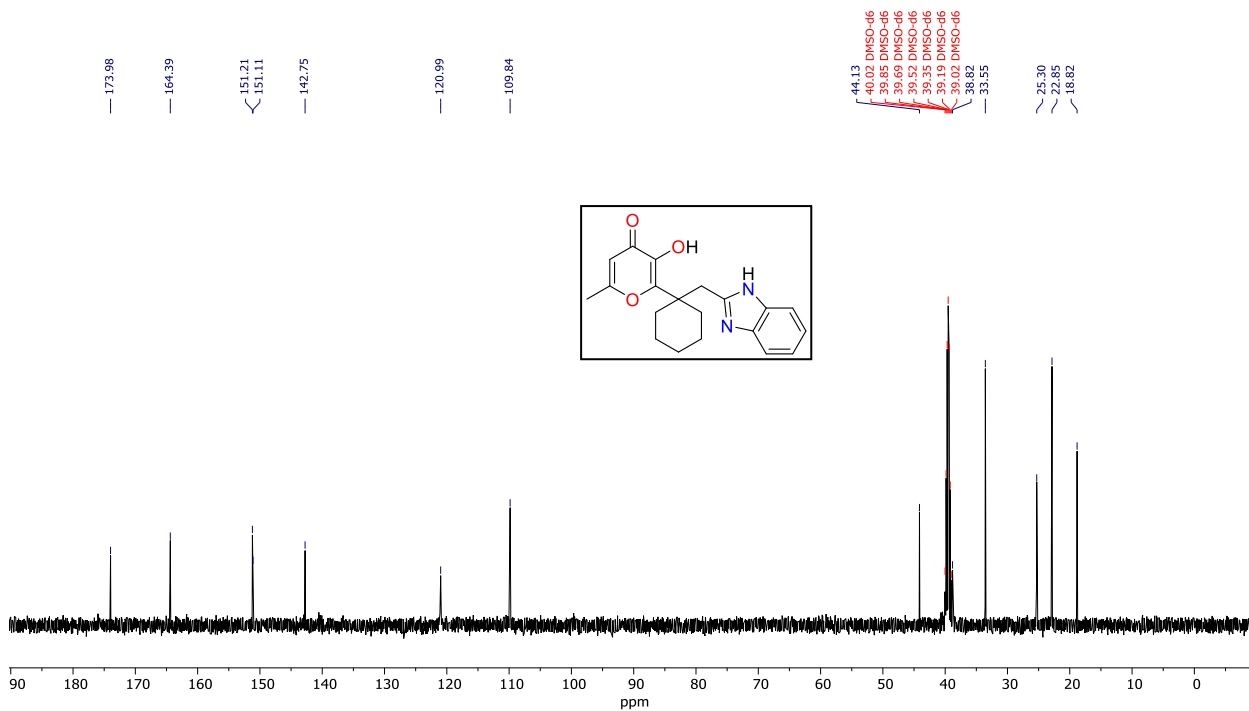

$^1\text{H}$  NMR spectrum (300 MHz) of **3c** in  $\text{DMSO-}d_6$

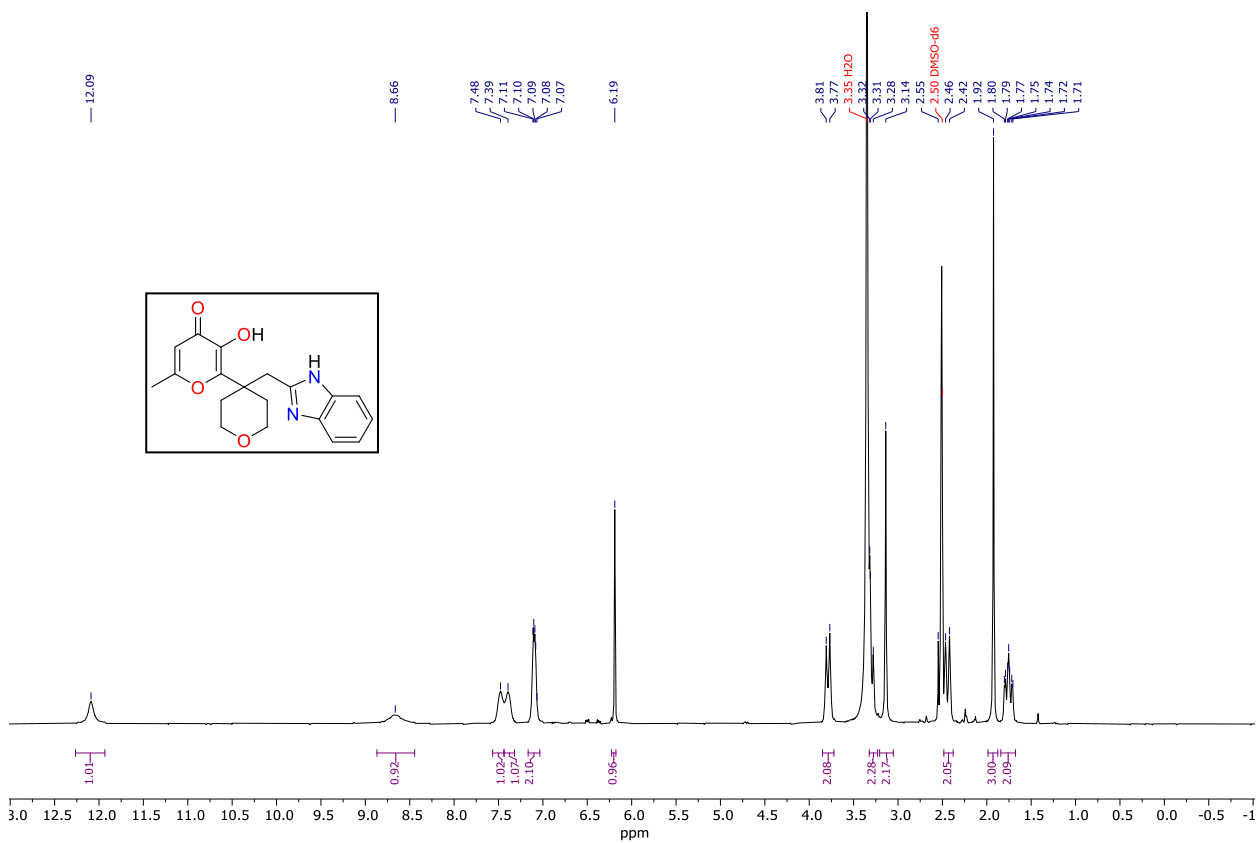

$^{13}\text{C}$   $\{^1\text{H}\}$  NMR spectrum (126 MHz) of **3c** in  $\text{DMSO-}d_6$

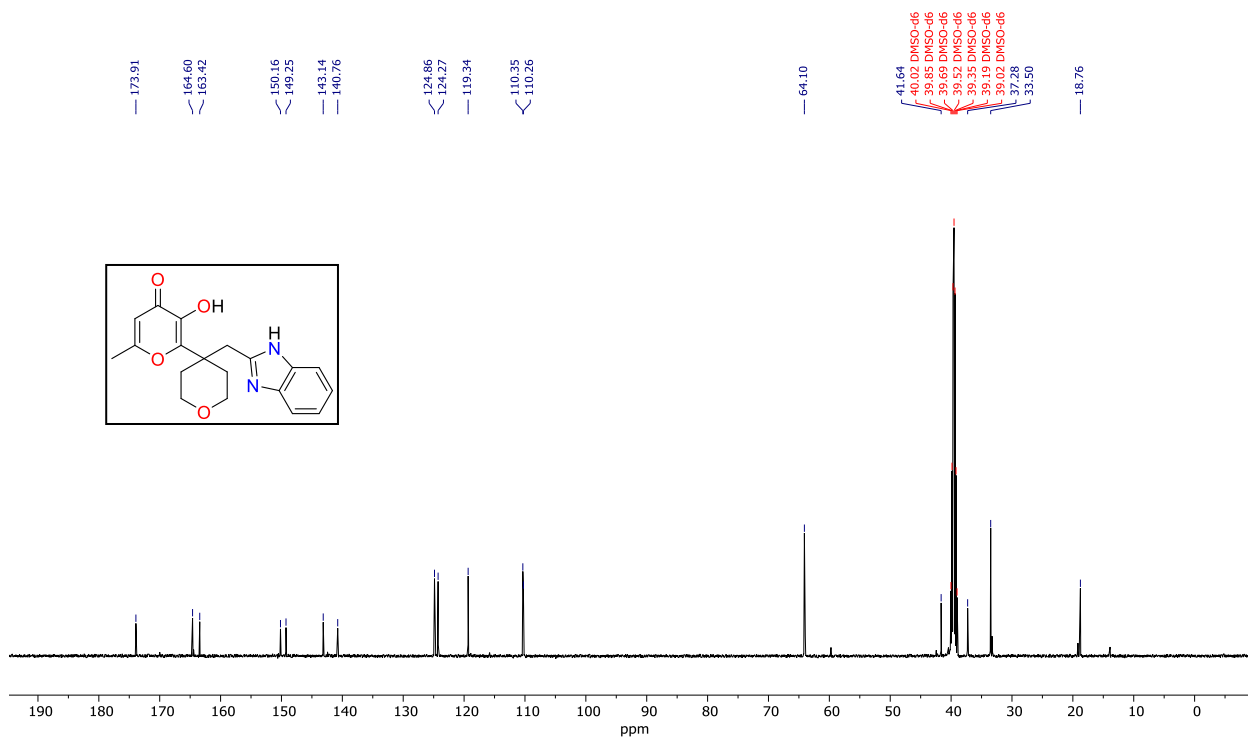

$^1\text{H}$  NMR spectrum (300 MHz) of **3d** in  $\text{DMSO-}d_6$

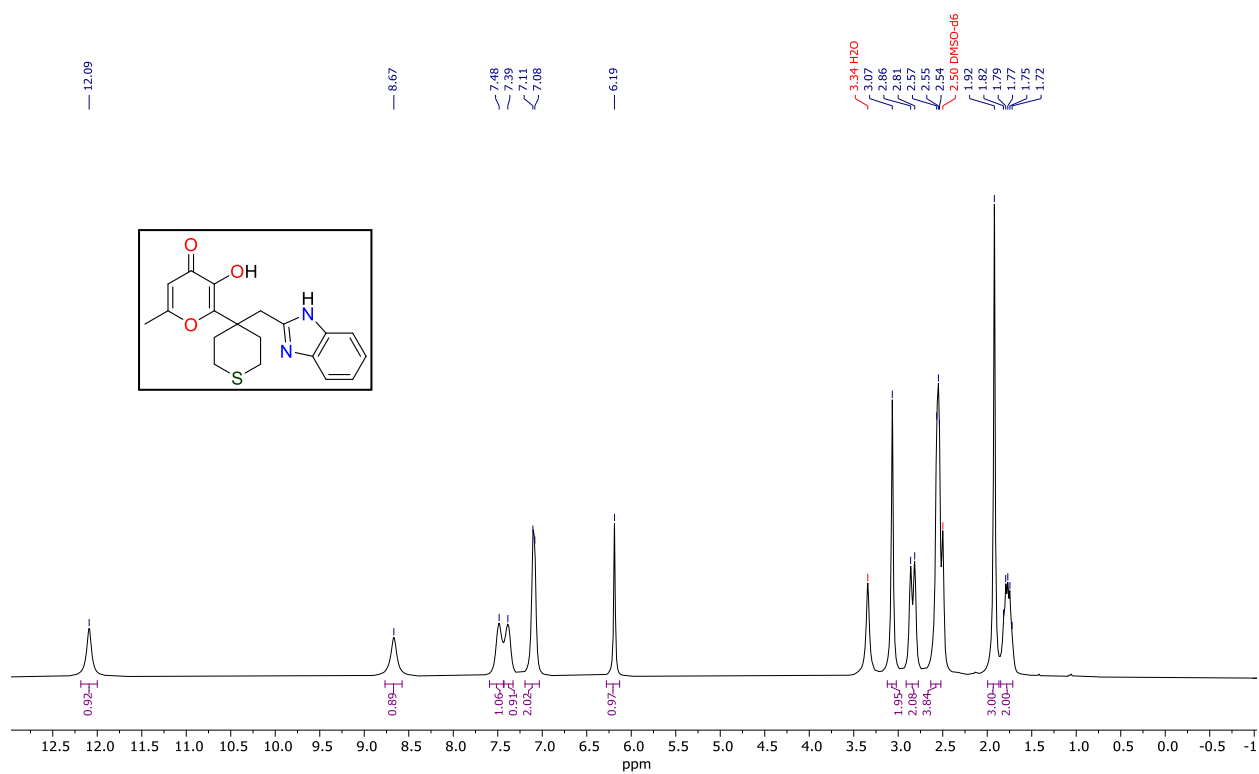

$^{13}\text{C}$  { $^1\text{H}$ } NMR spectrum (126 MHz) of **3d** in  $\text{DMSO-}d_6$

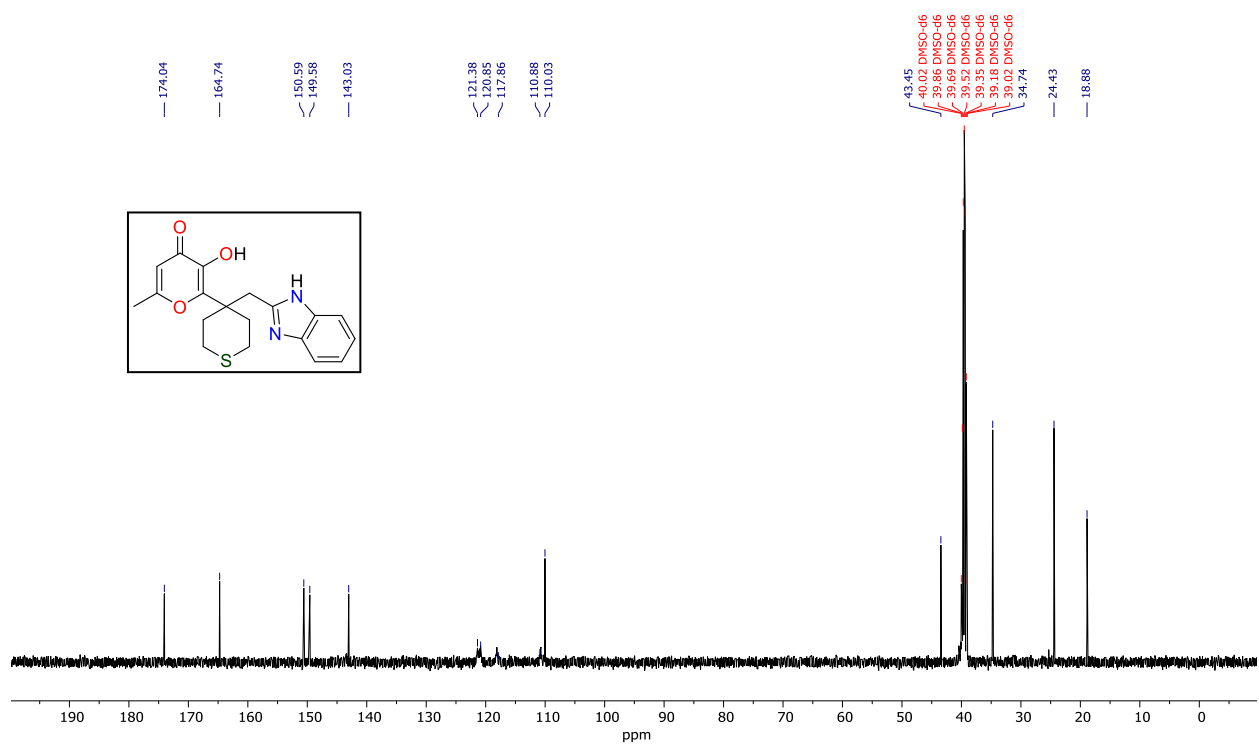

$^1\text{H}$  NMR spectrum (300 MHz) of **3e** in  $\text{DMSO-}d_6$

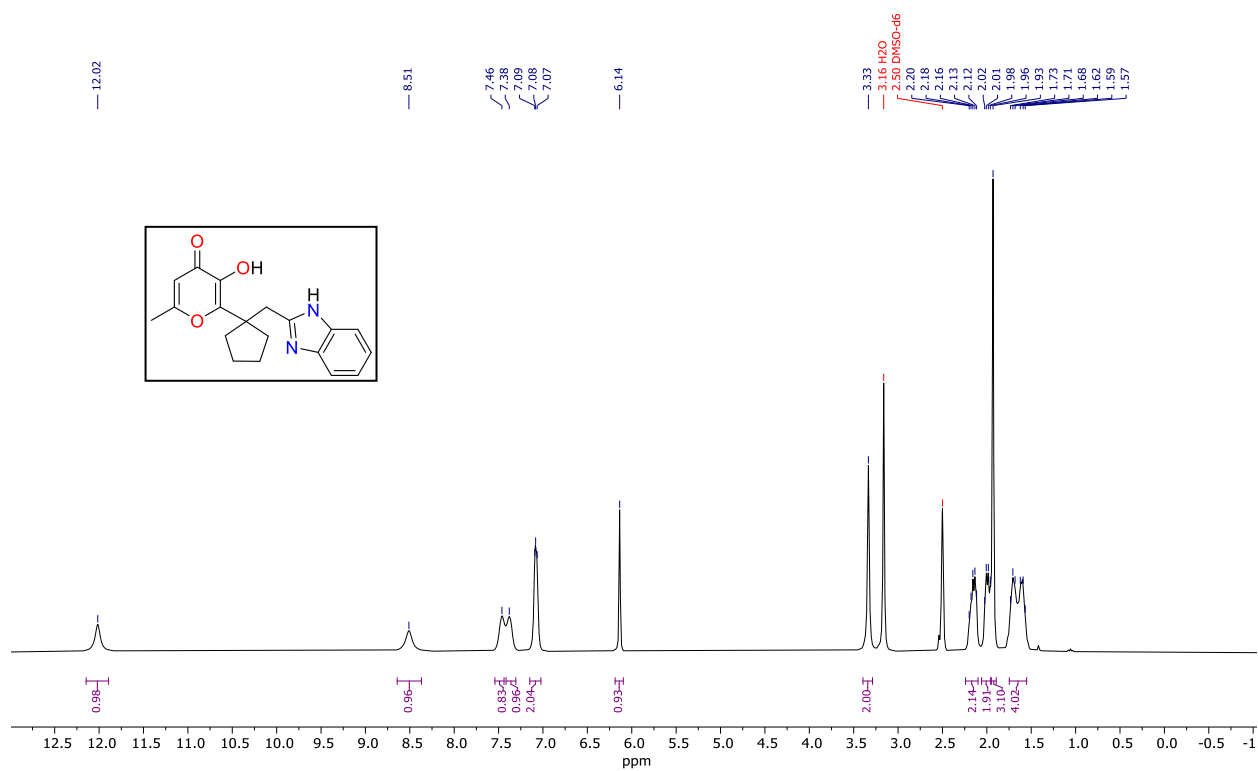

$^{13}\text{C}$  { $^1\text{H}$ } NMR spectrum (126 MHz) of **3e** in  $\text{DMSO-}d_6$

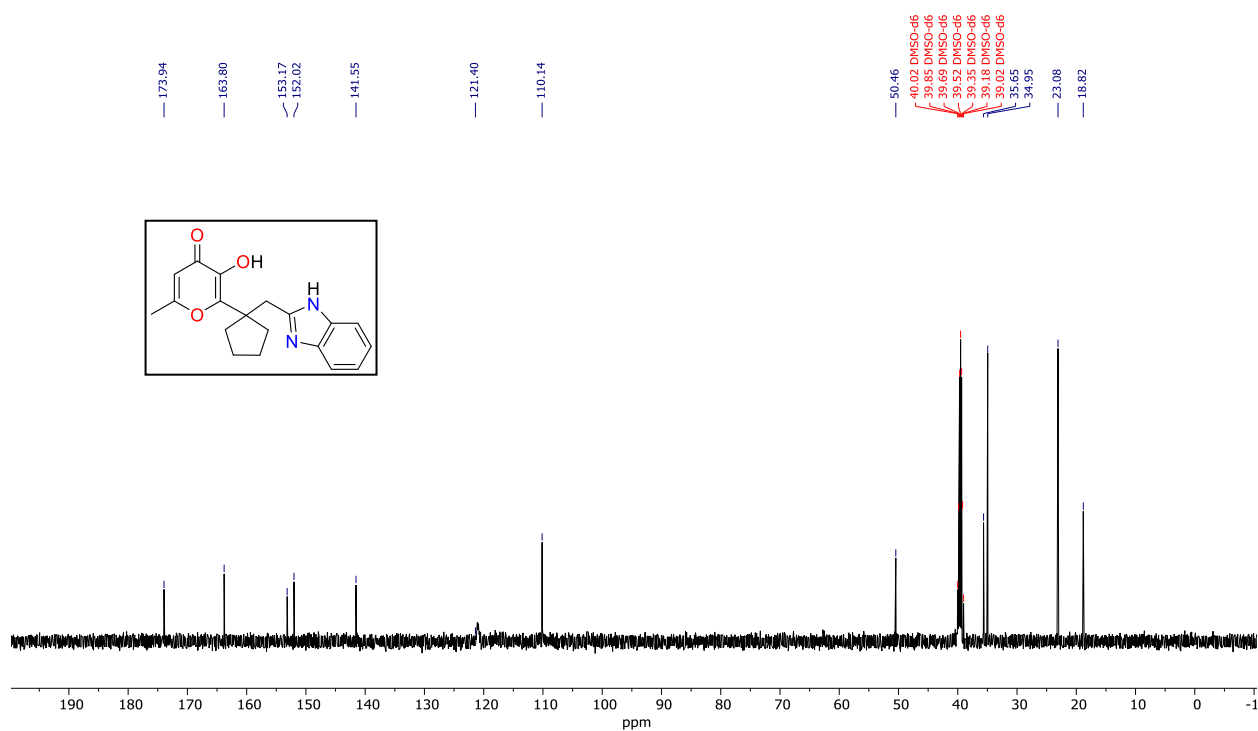

## 4.2. Mixture of photoproducts **4** and **5**

$^1\text{H}$  NMR spectrum (400 MHz) of mixture of **4a** and **5a** in  $\text{DMSO-}d_6$

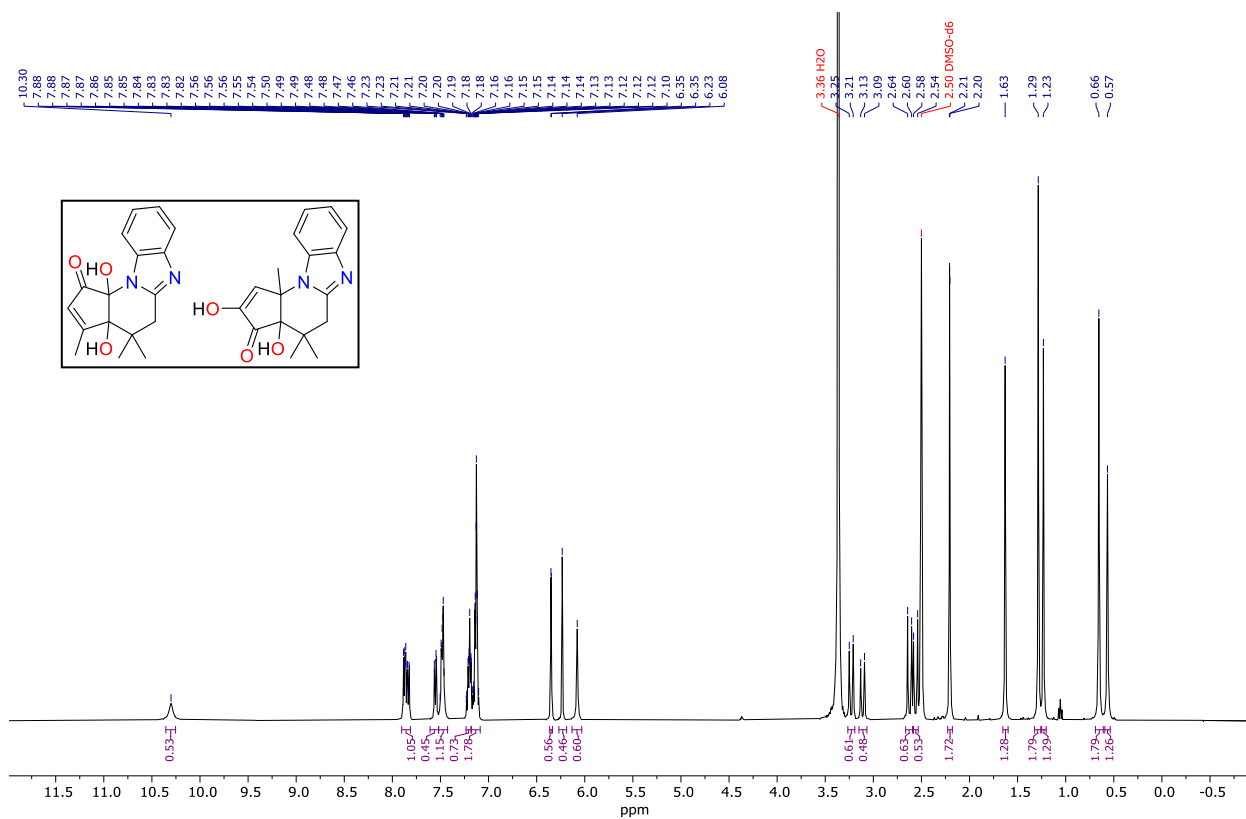

$^{13}\text{C}$  { $^1\text{H}$ } NMR spectrum (101 MHz) of mixture of **4a** and **5a** in  $\text{DMSO-}d_6$

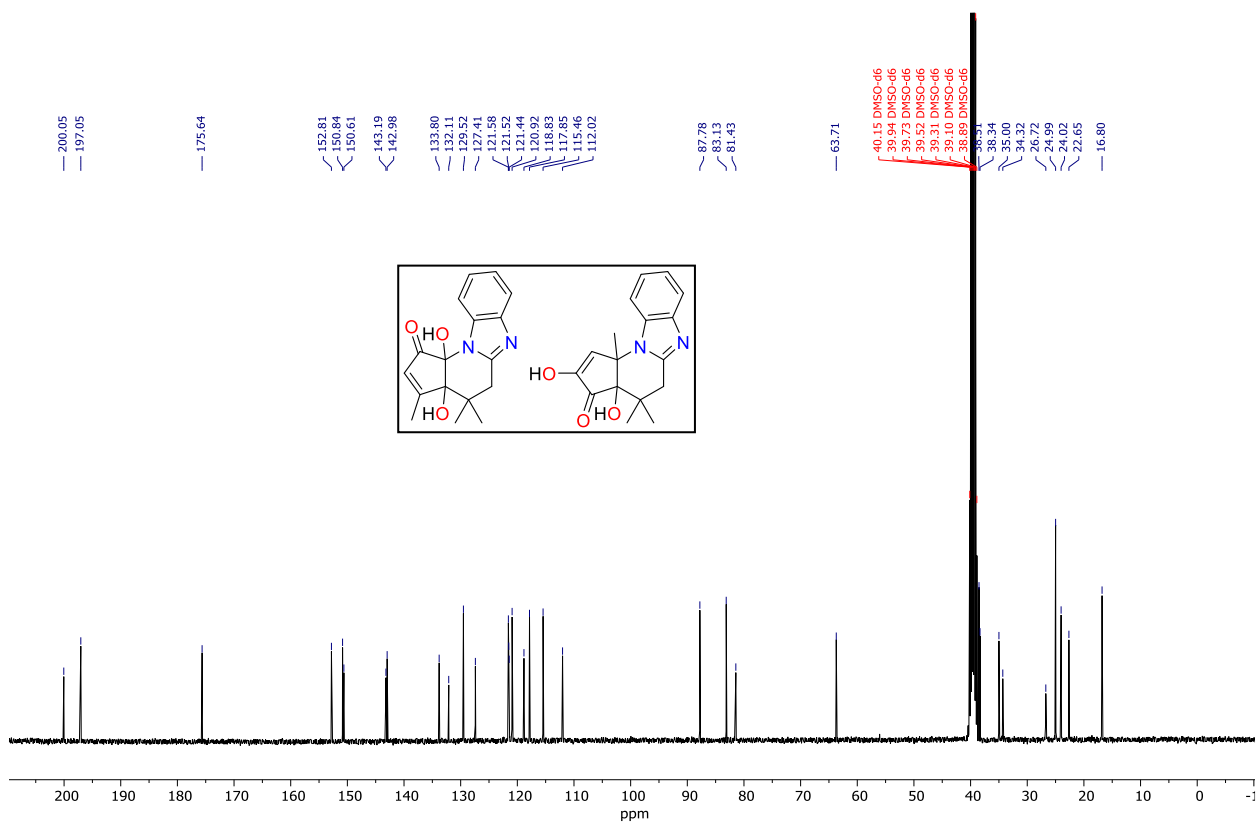

$^1\text{H}$  NMR spectrum (300 MHz) of mixture of **4b** and **5b** in  $\text{DMSO-}d_6$

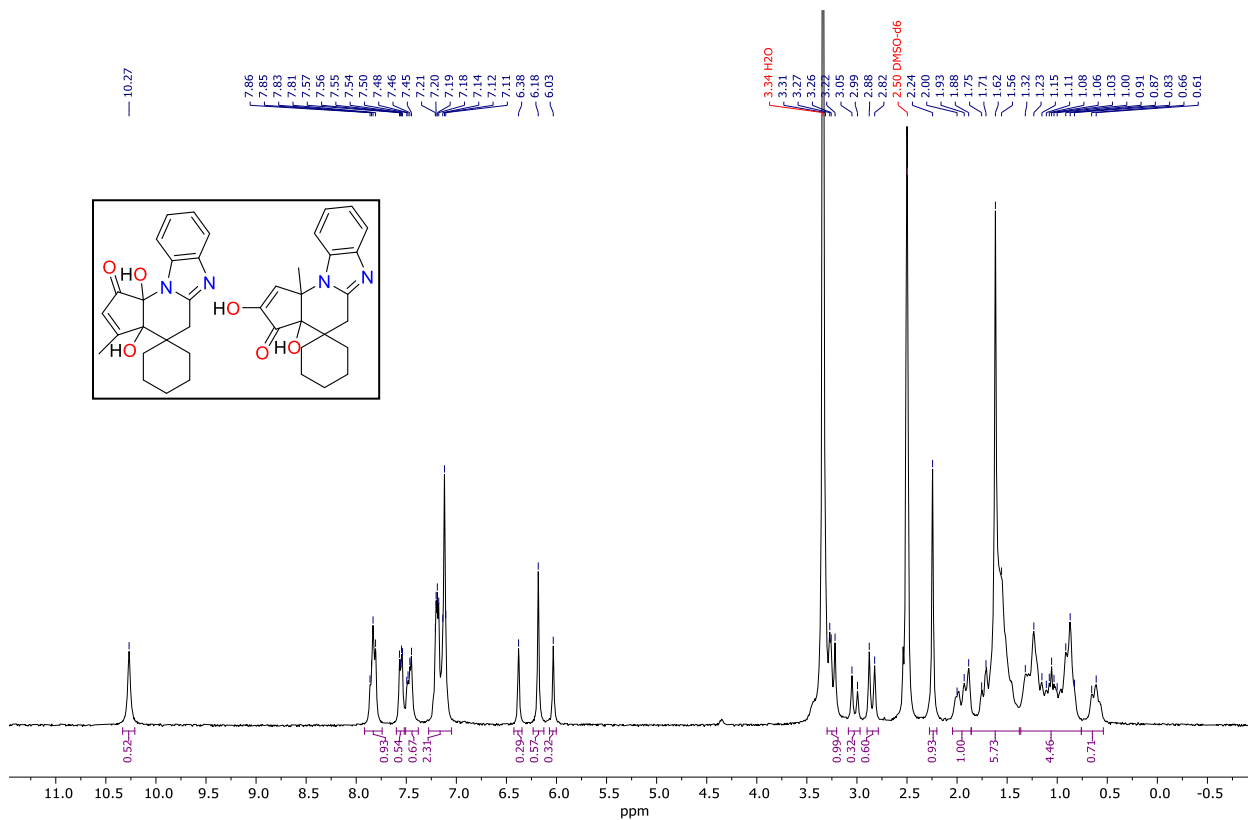

$^{13}\text{C}$  { $^1\text{H}$ } NMR spectrum (126 MHz) of mixture of **4b** and **5b** in  $\text{DMSO-}d_6$

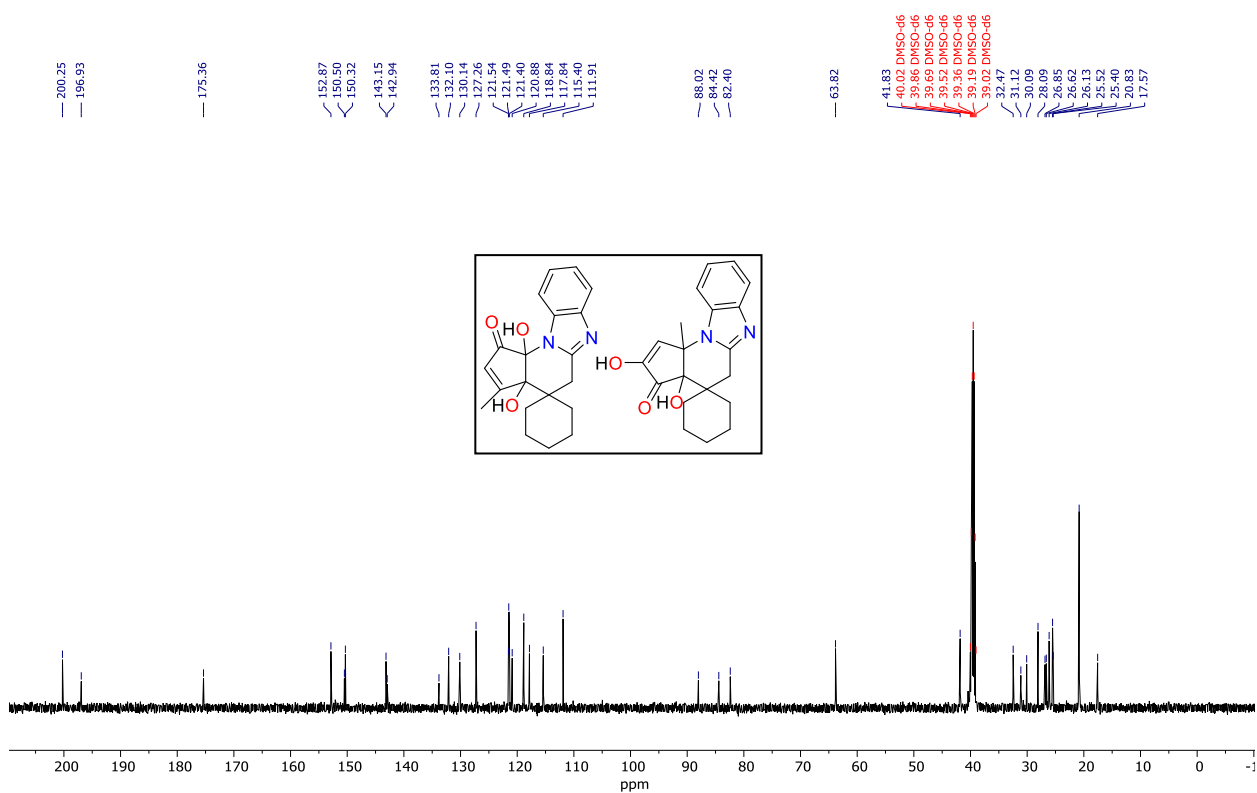

$^1\text{H}$  NMR spectrum (300 MHz) of mixture of **4c** and **5c** in  $\text{DMSO-}d_6$

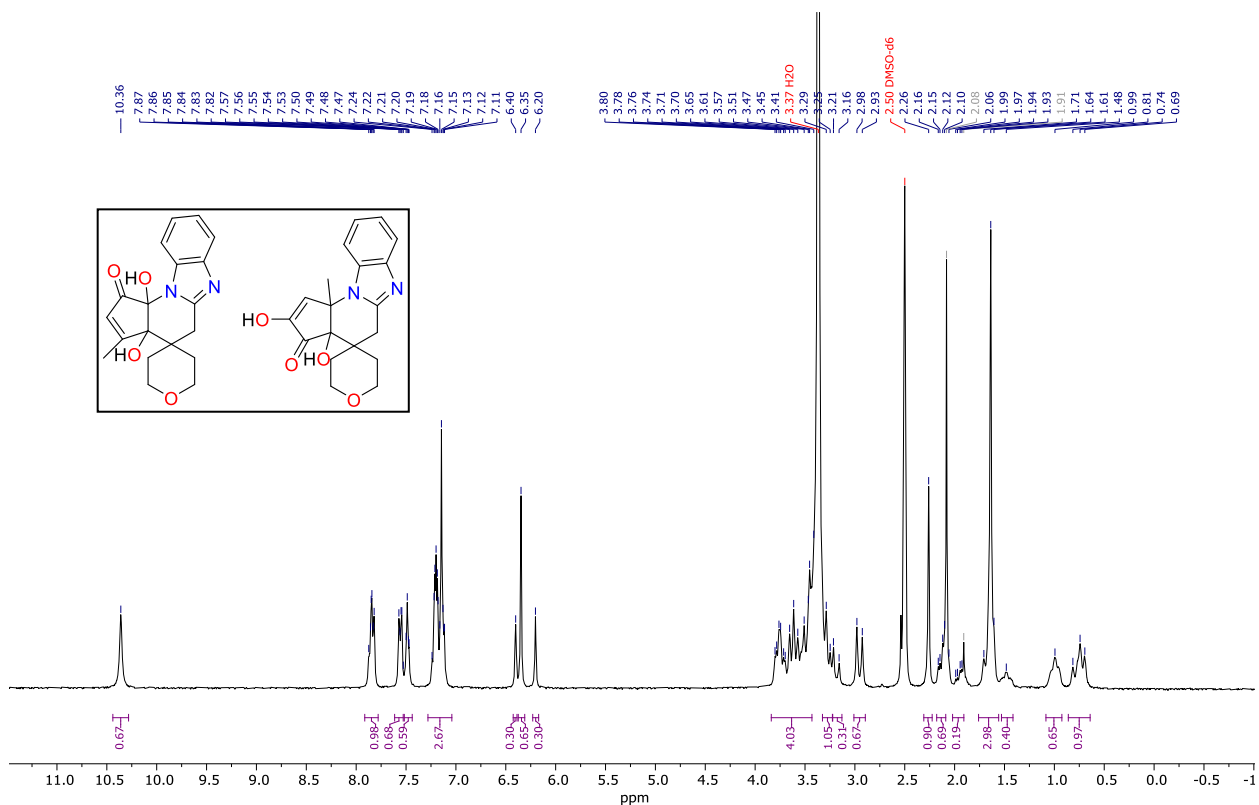

$^{13}\text{C}$   $\{^1\text{H}\}$  NMR spectrum (126 MHz) of mixture of **4c** and **5c** in  $\text{DMSO-}d_6$

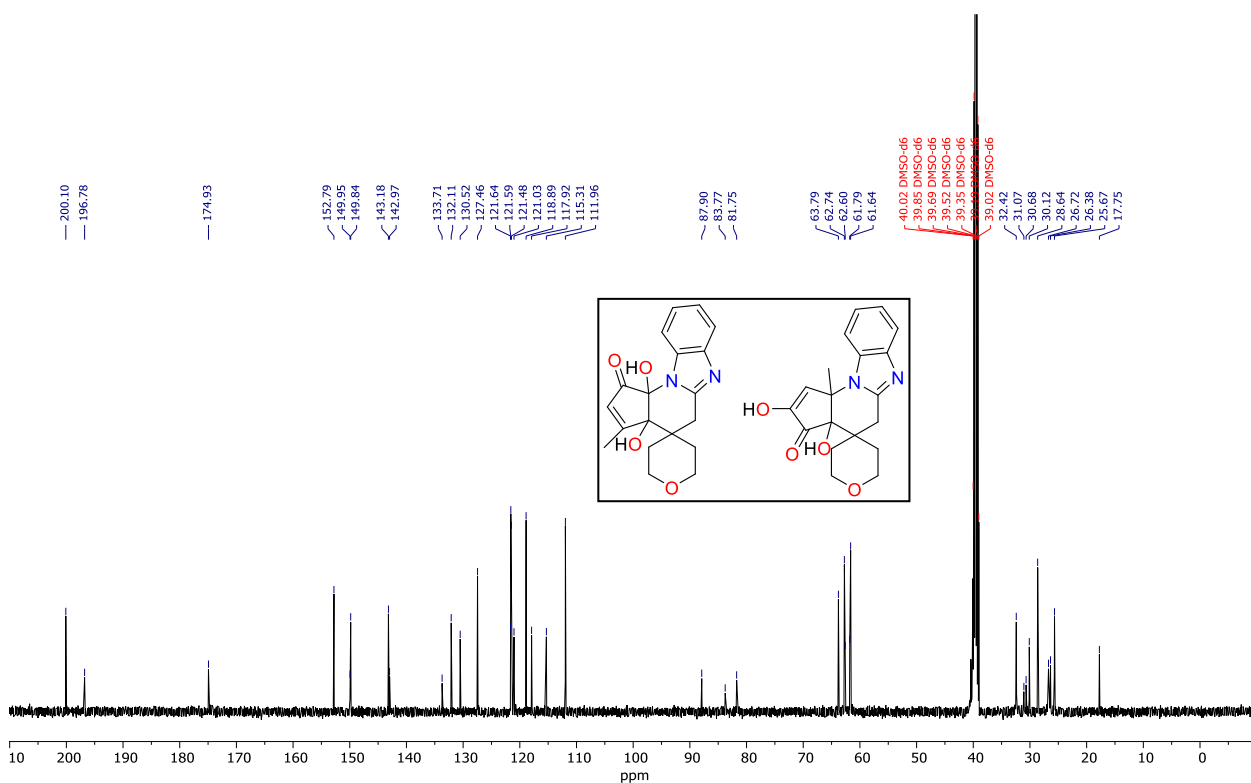

$^1\text{H}$  NMR spectrum (300 MHz) of mixture of **4d** and **5d** in  $\text{DMSO-}d_6$

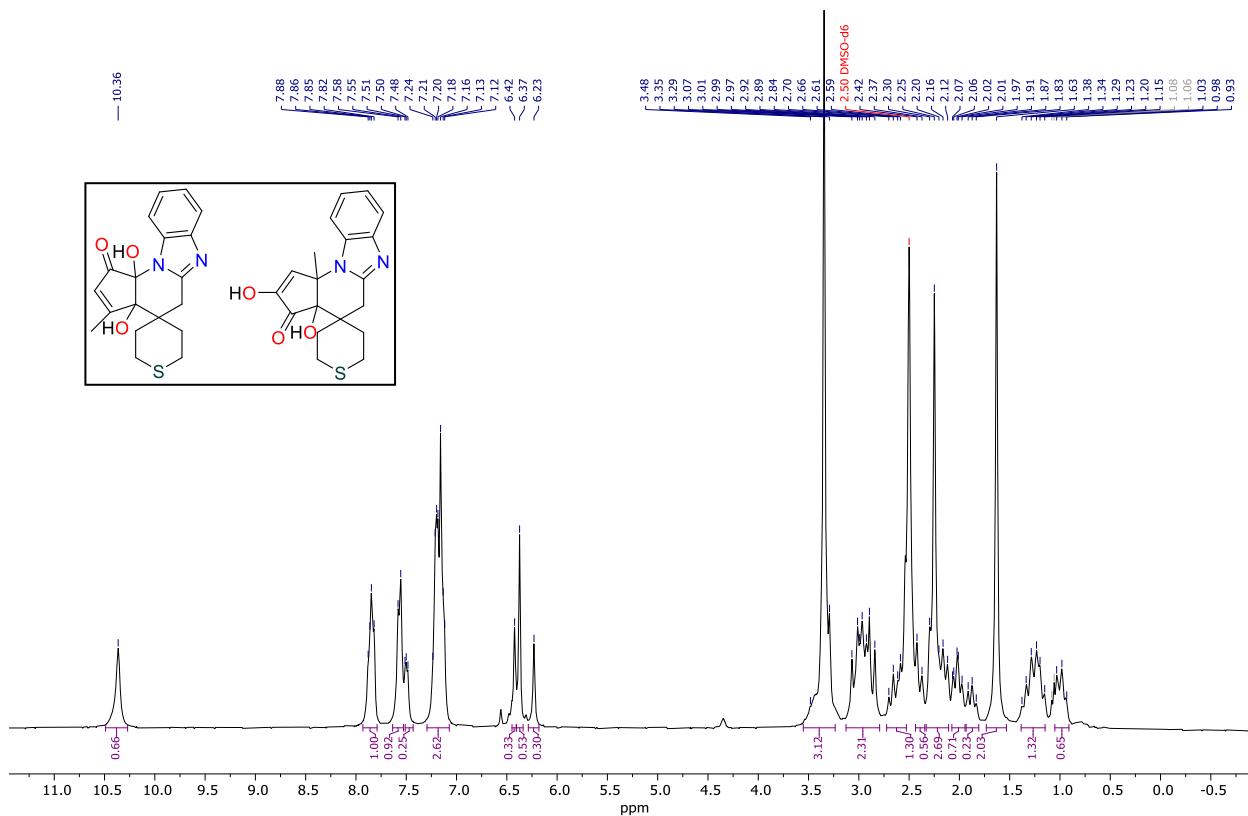

$^{13}\text{C}$  { $^1\text{H}$ } NMR spectrum (126 MHz) of mixture of **4d** and **5d** in  $\text{DMSO-}d_6$

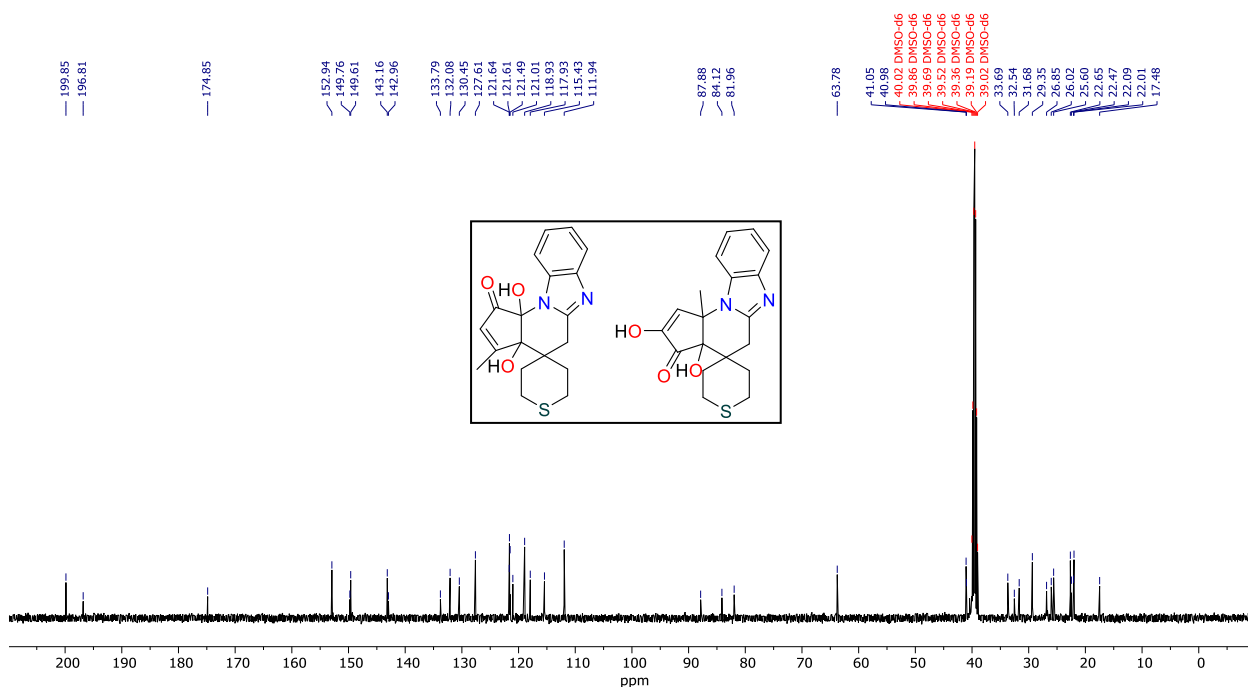



$^1\text{H}$  NMR spectrum (300 MHz) of mixture of **4e** and **5e** in  $\text{DMSO-}d_6$

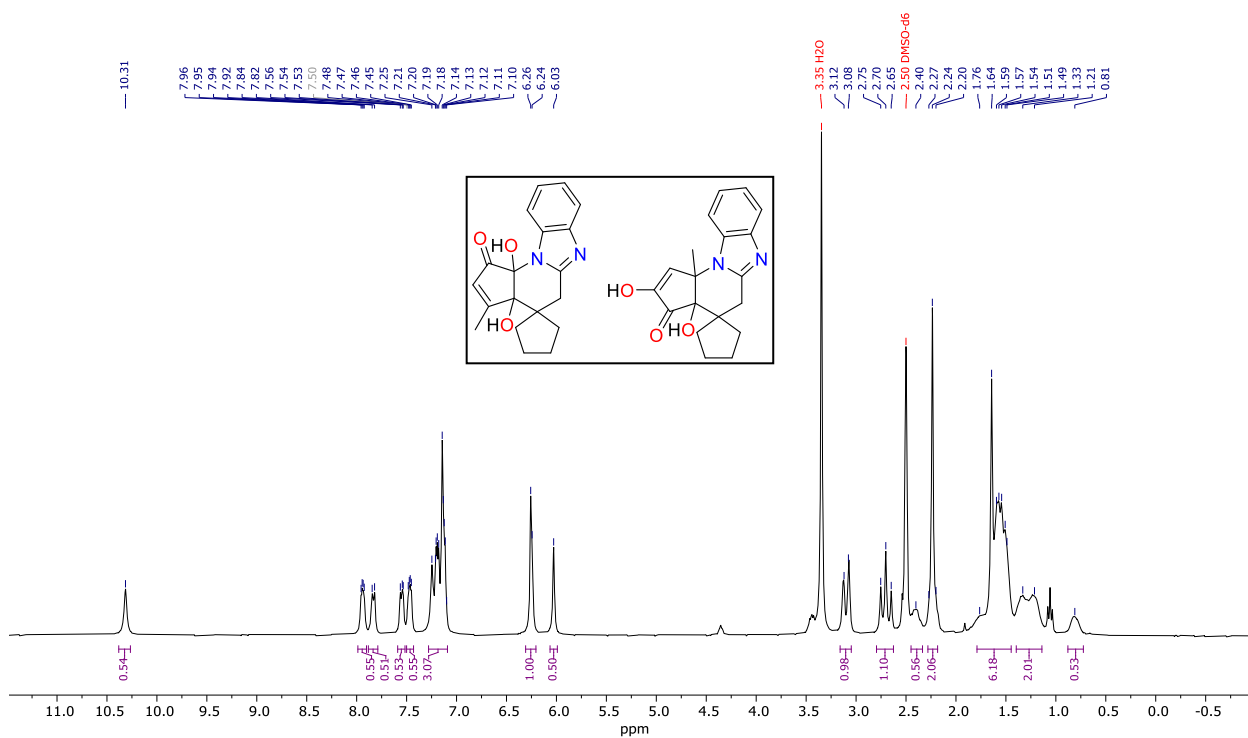

$^{13}\text{C}$   $\{^1\text{H}\}$  NMR spectrum (75 MHz) of mixture of **4e** and **5e** in  $\text{DMSO-}d_6$

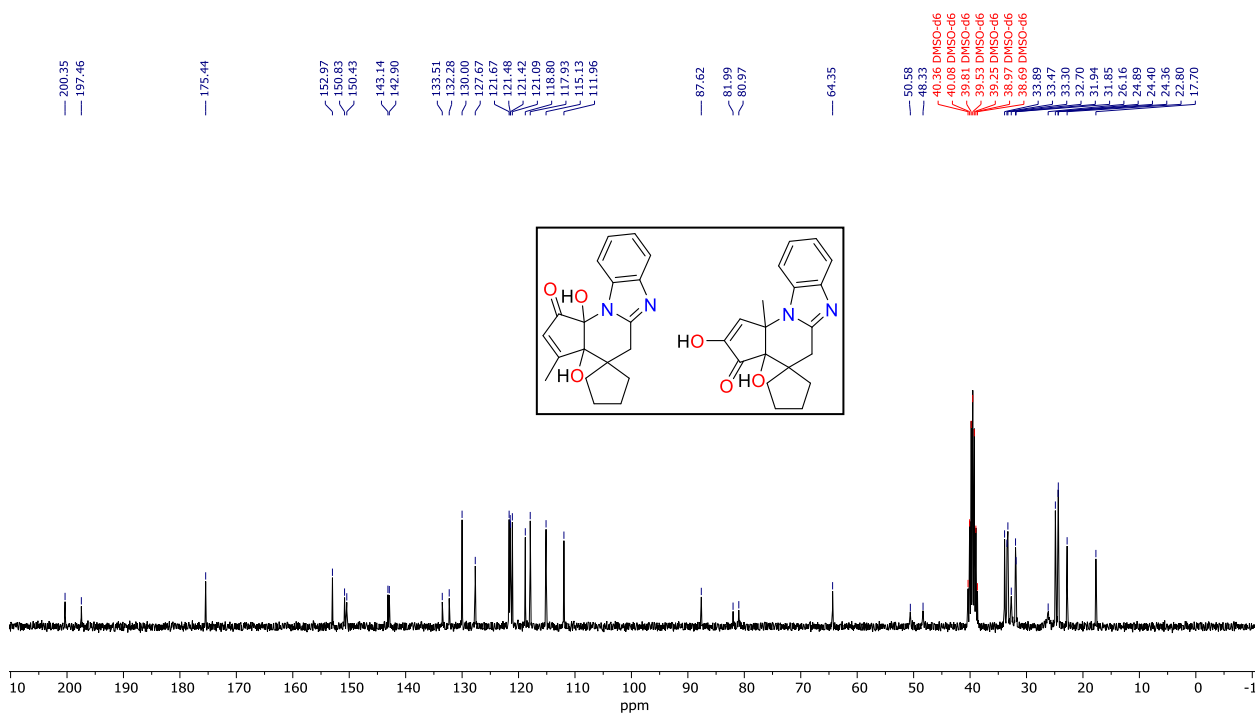

### 4.3. Derivatization products 10-13

$^1\text{H}$  NMR spectrum (300 MHz) of **10a** in  $\text{DMSO-}d_6$

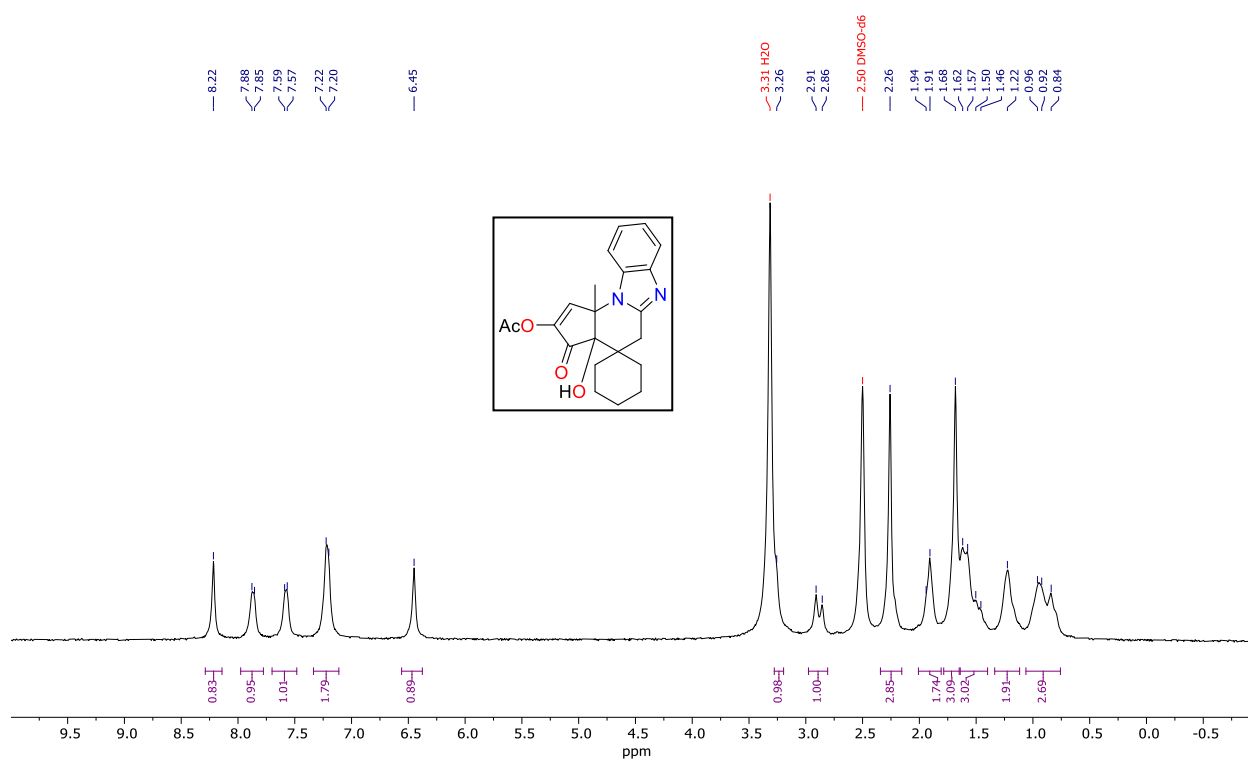

$^{13}\text{C}$   $\{^1\text{H}\}$  NMR spectrum (75 MHz) of **10a** in  $\text{DMSO-}d_6$

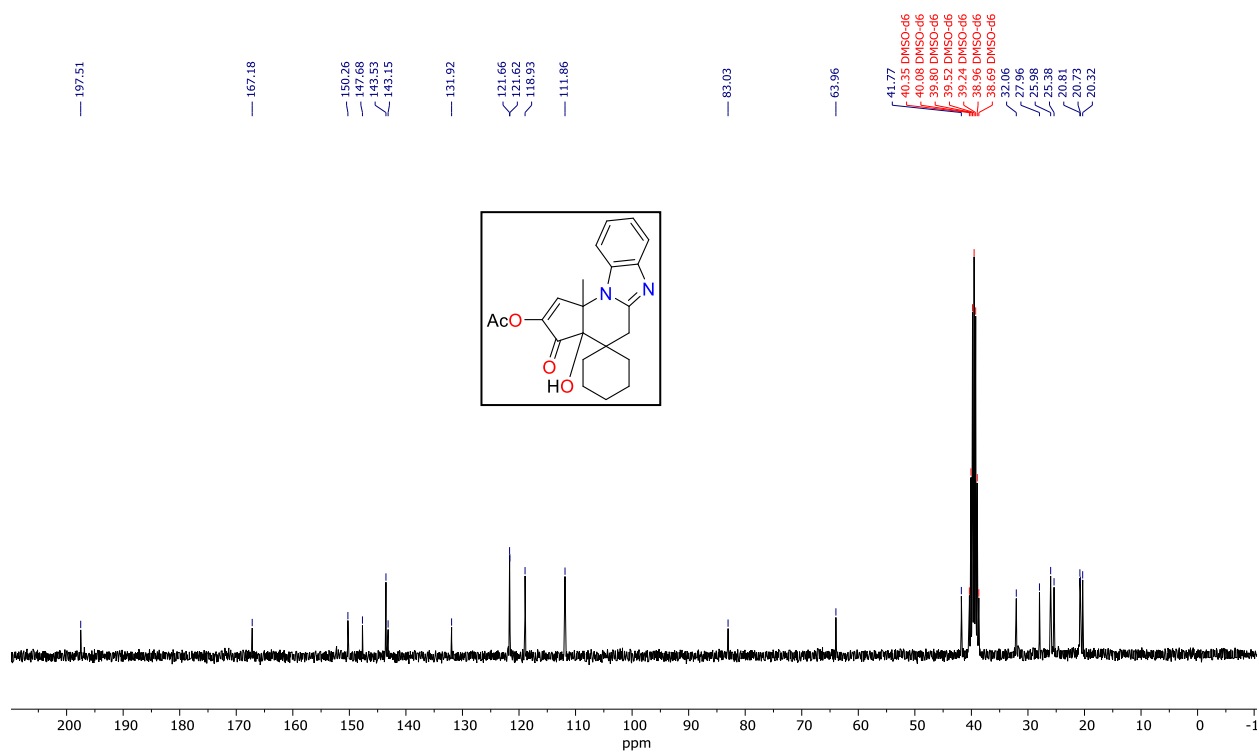

$^1\text{H}$  NMR spectrum (300 MHz) of **10b** in  $\text{DMSO-}d_6$

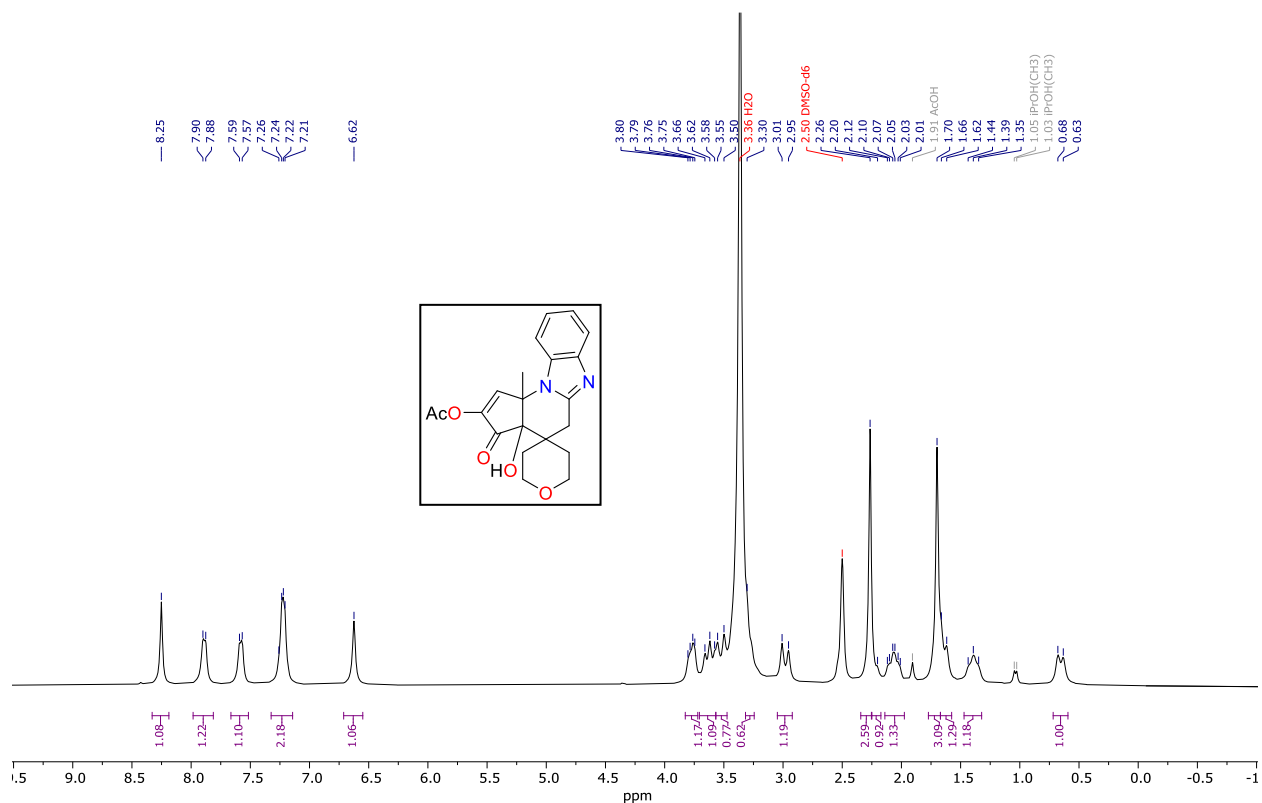

$^{13}\text{C}$   $\{^1\text{H}\}$  NMR spectrum (151 MHz) of **10b** in  $\text{DMSO-}d_6$

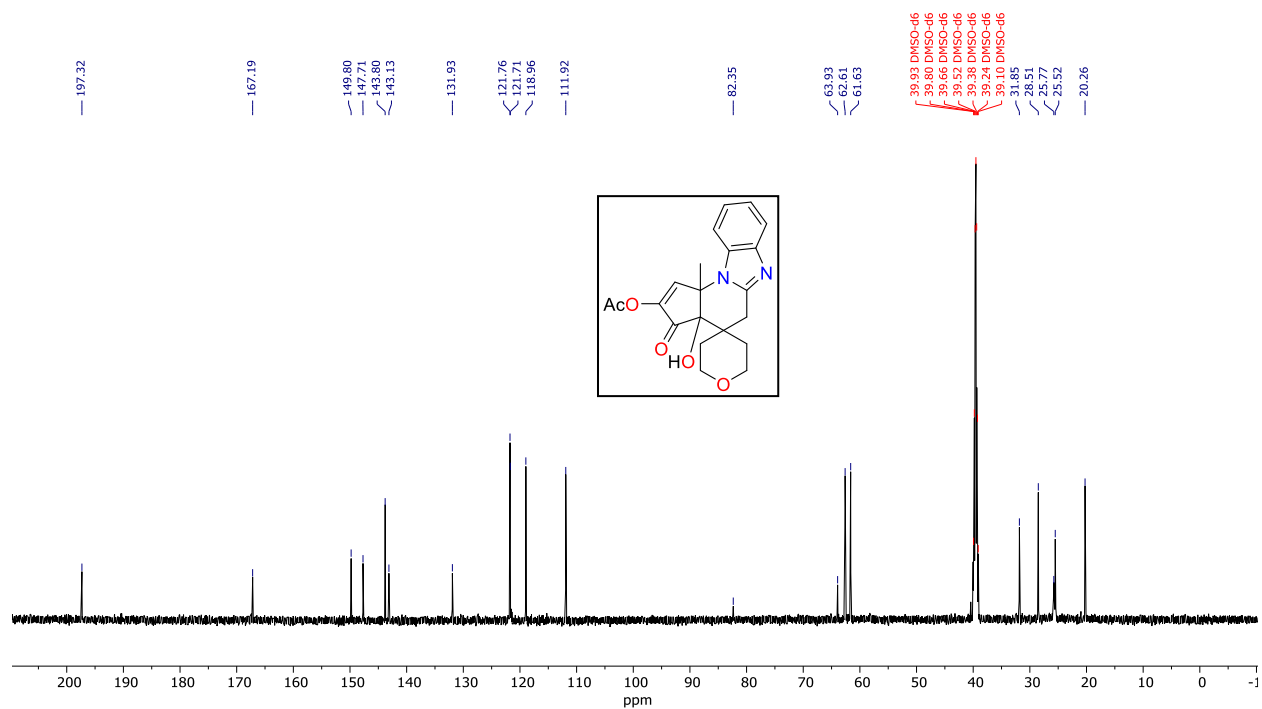

$^1\text{H}$  NMR spectrum (300 MHz) of **11a** in  $\text{DMSO-}d_6$

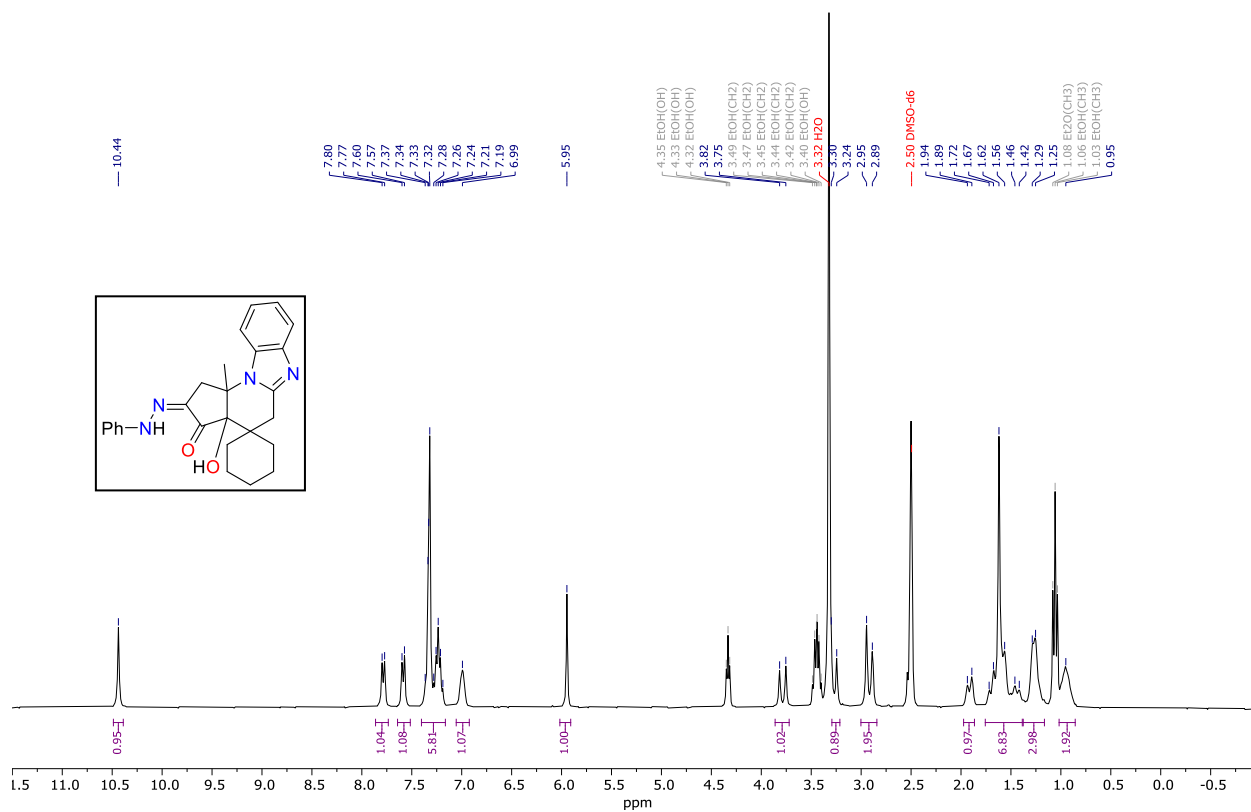

$^{13}\text{C}$  { $^1\text{H}$ } NMR spectrum (75 MHz) of **11a** in  $\text{DMSO-}d_6$

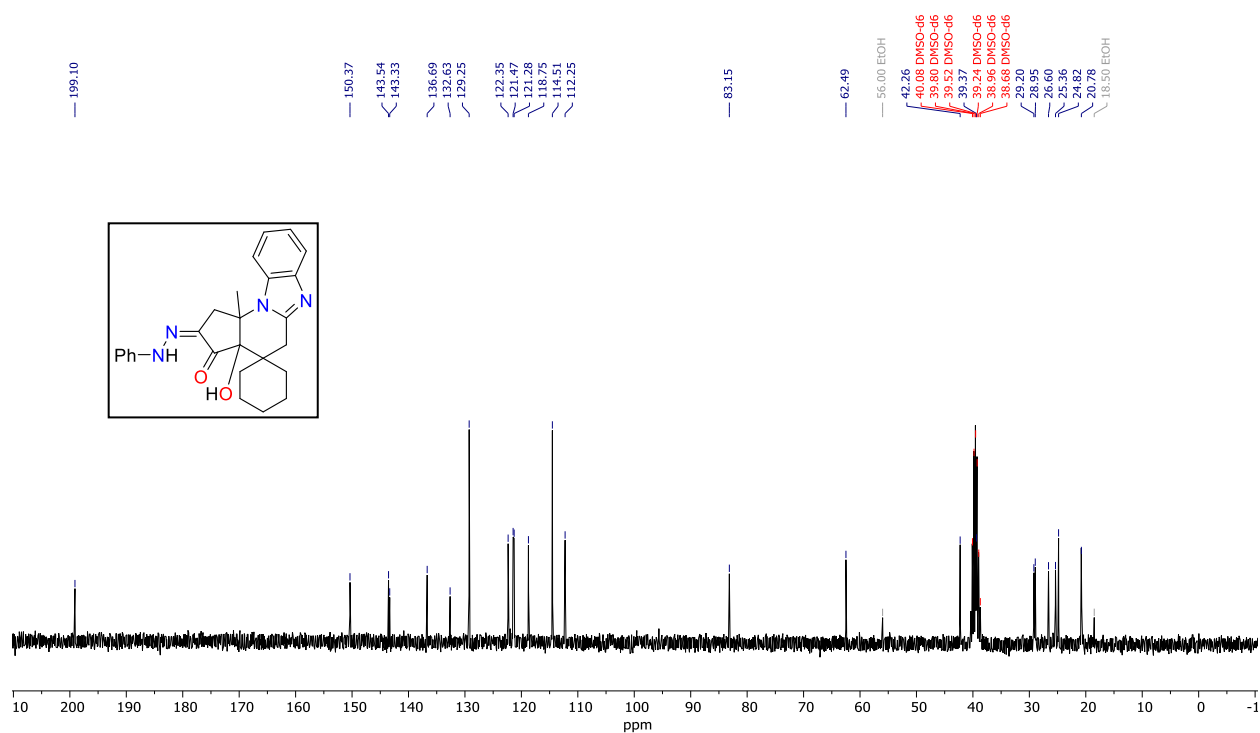

$^1\text{H}$  NMR spectrum (300 MHz) of **11b** in  $\text{DMSO-}d_6$

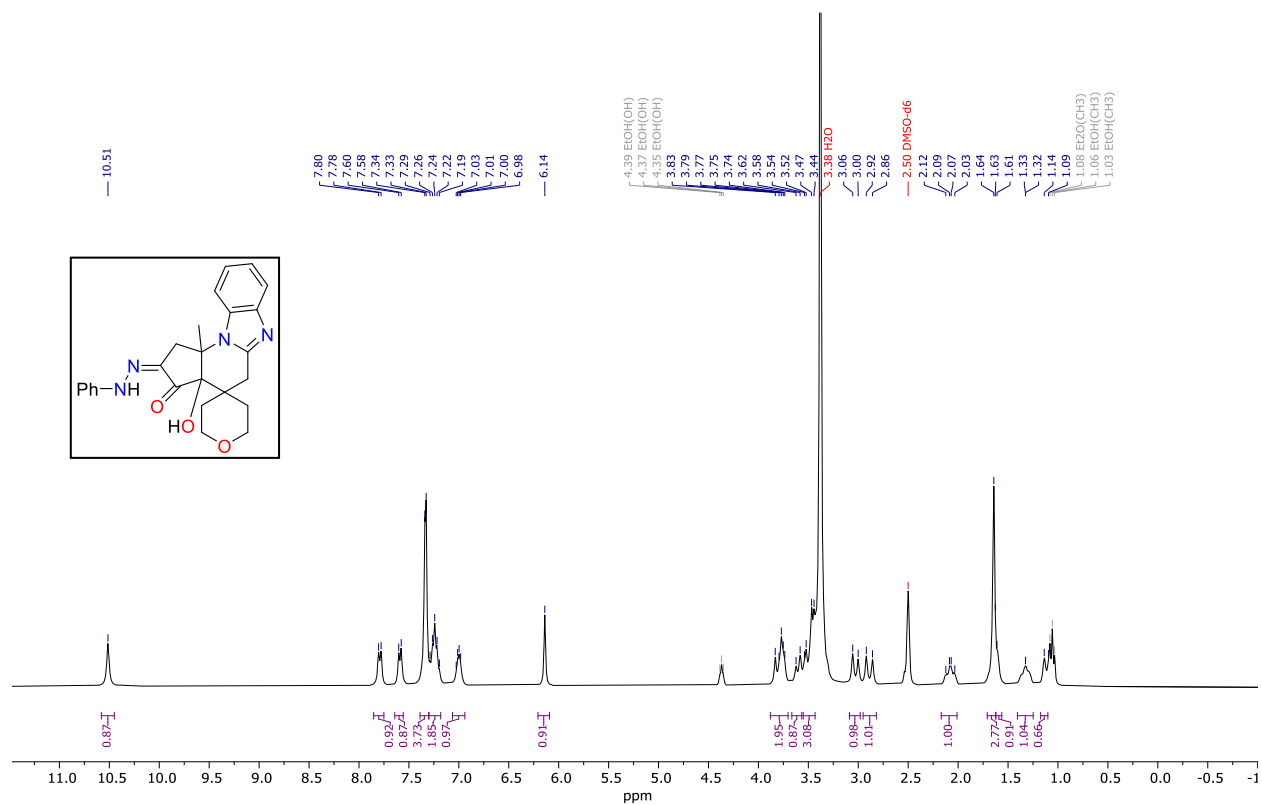

$^{13}\text{C}$   $\{^1\text{H}\}$  NMR spectrum (151 MHz) of **11b** in  $\text{DMSO-}d_6$

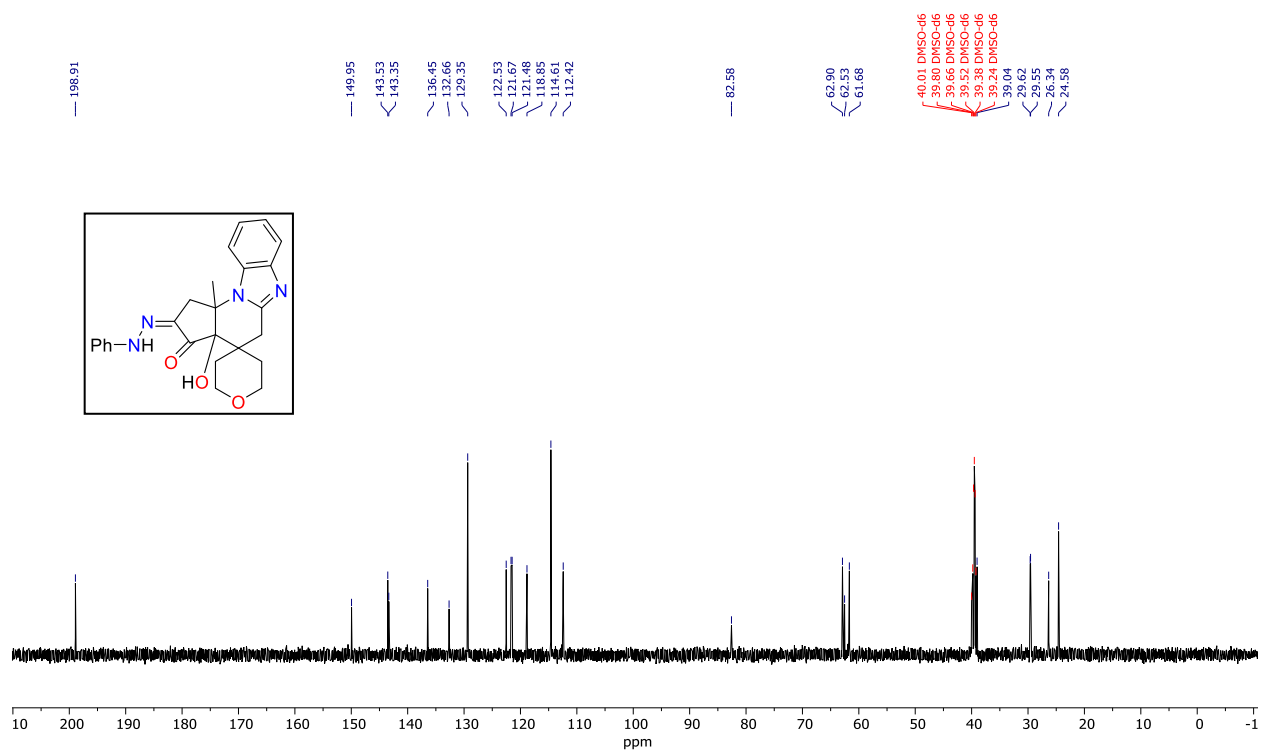

$^1\text{H}$  NMR spectrum (300 MHz) of **12a** in  $\text{DMSO-}d_6$

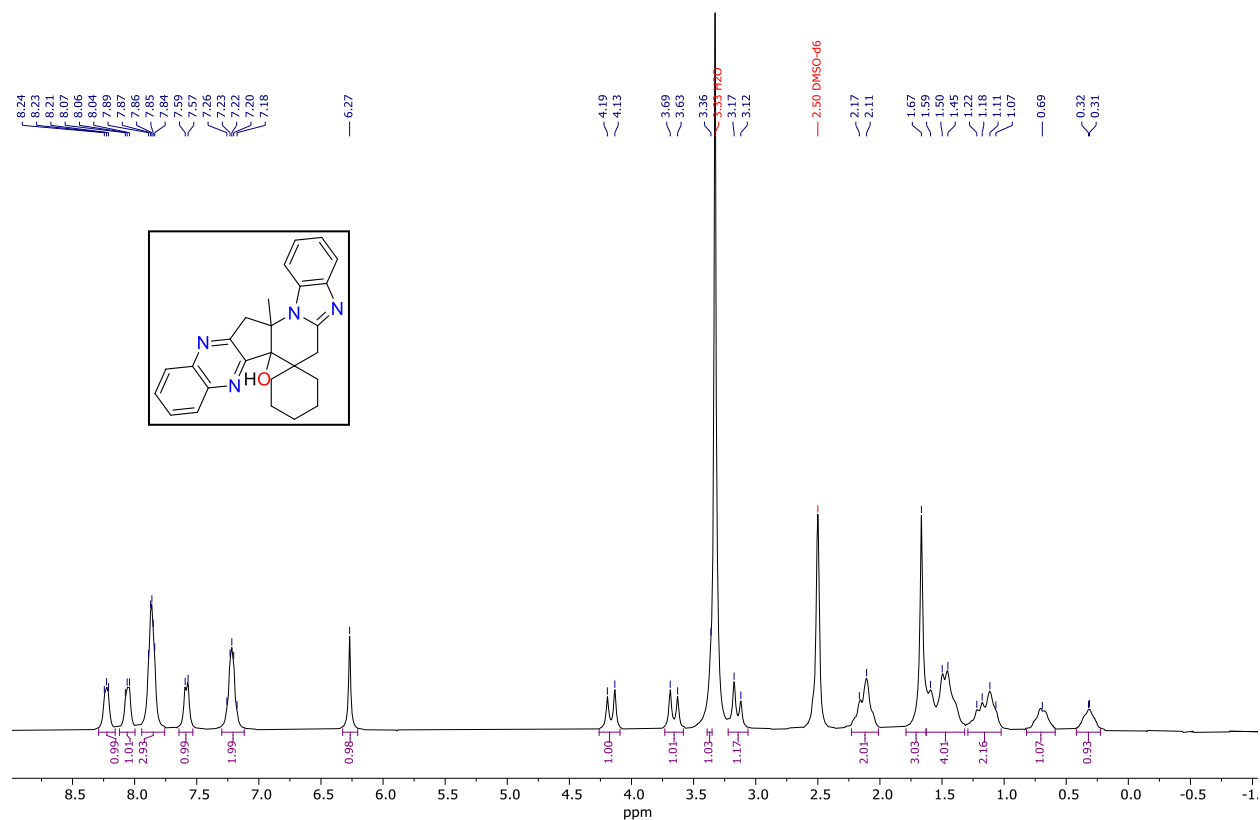

$^{13}\text{C}$   $\{^1\text{H}\}$  NMR spectrum (151 MHz) of **12a** in  $\text{DMSO-}d_6$

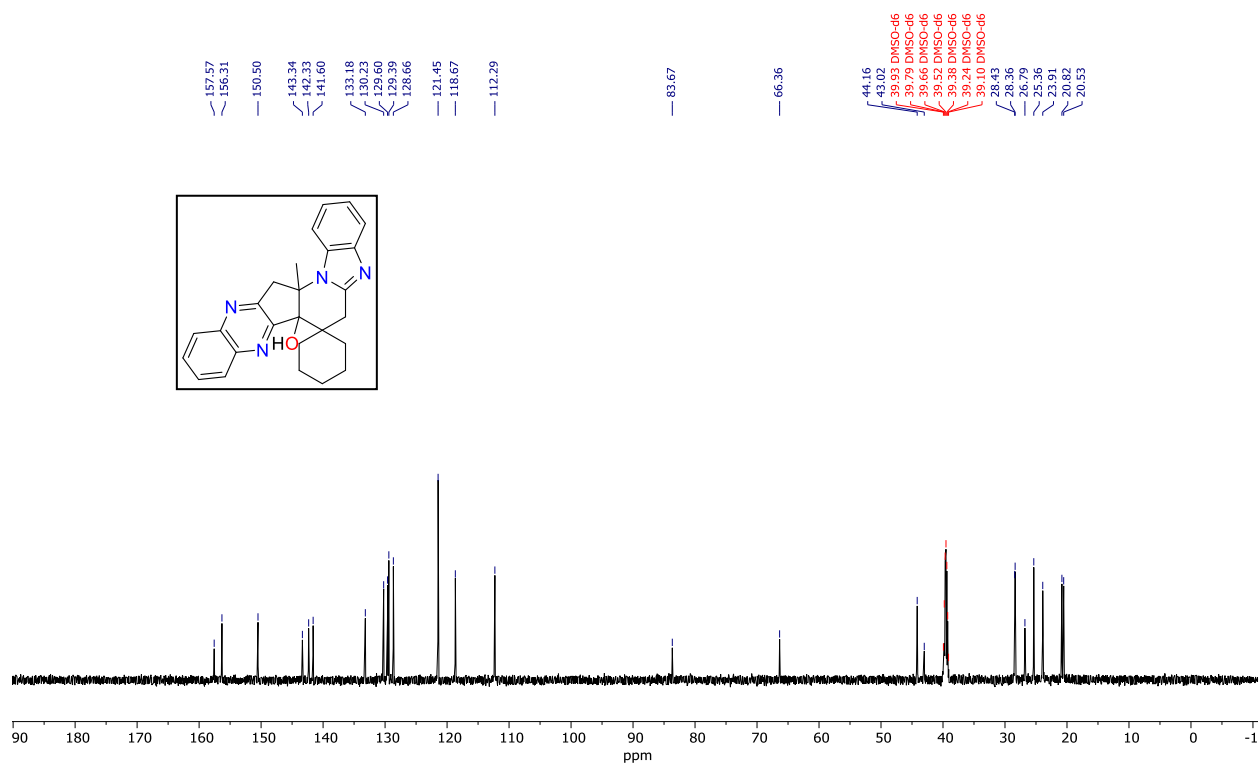

$^1\text{H}$  NMR spectrum (300 MHz) of **12b** in  $\text{DMSO-}d_6$

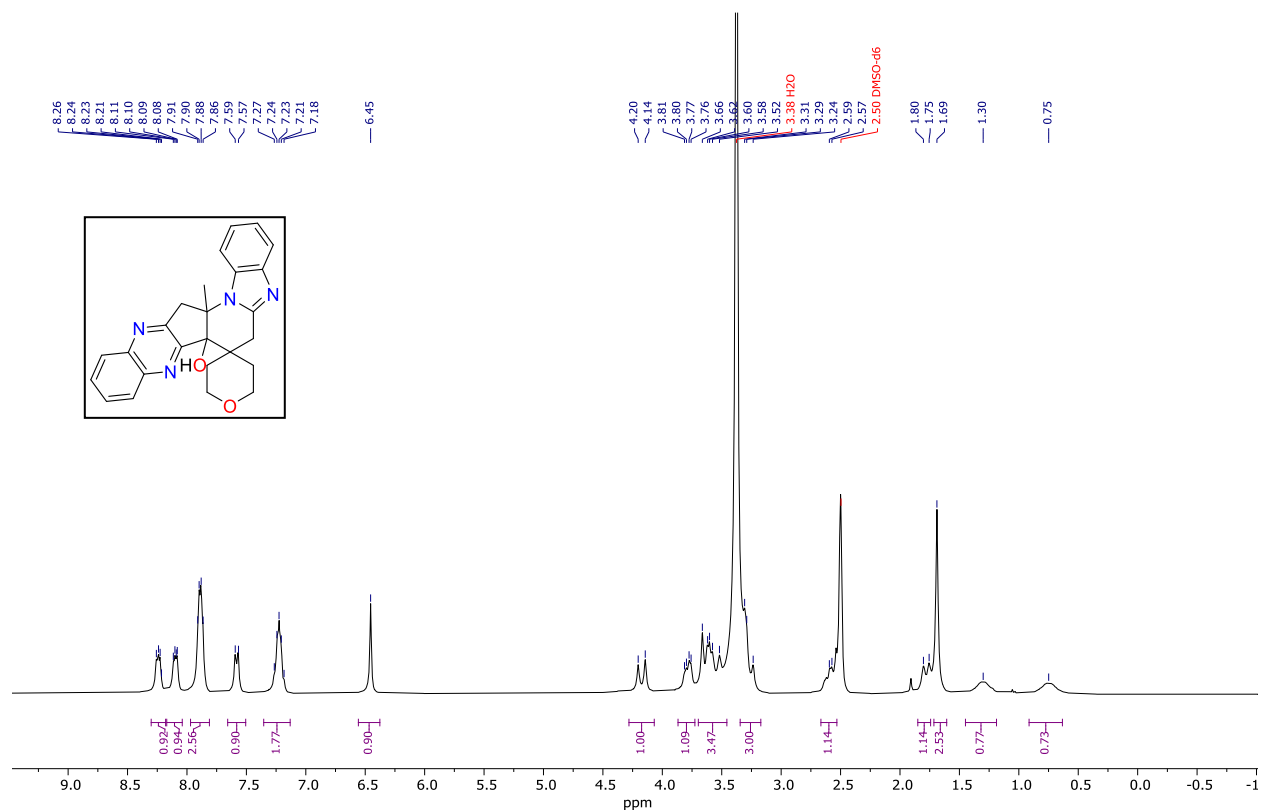

$^{13}\text{C}$  { $^1\text{H}$ } NMR spectrum (151 MHz) of **12b** in  $\text{DMSO-}d_6$

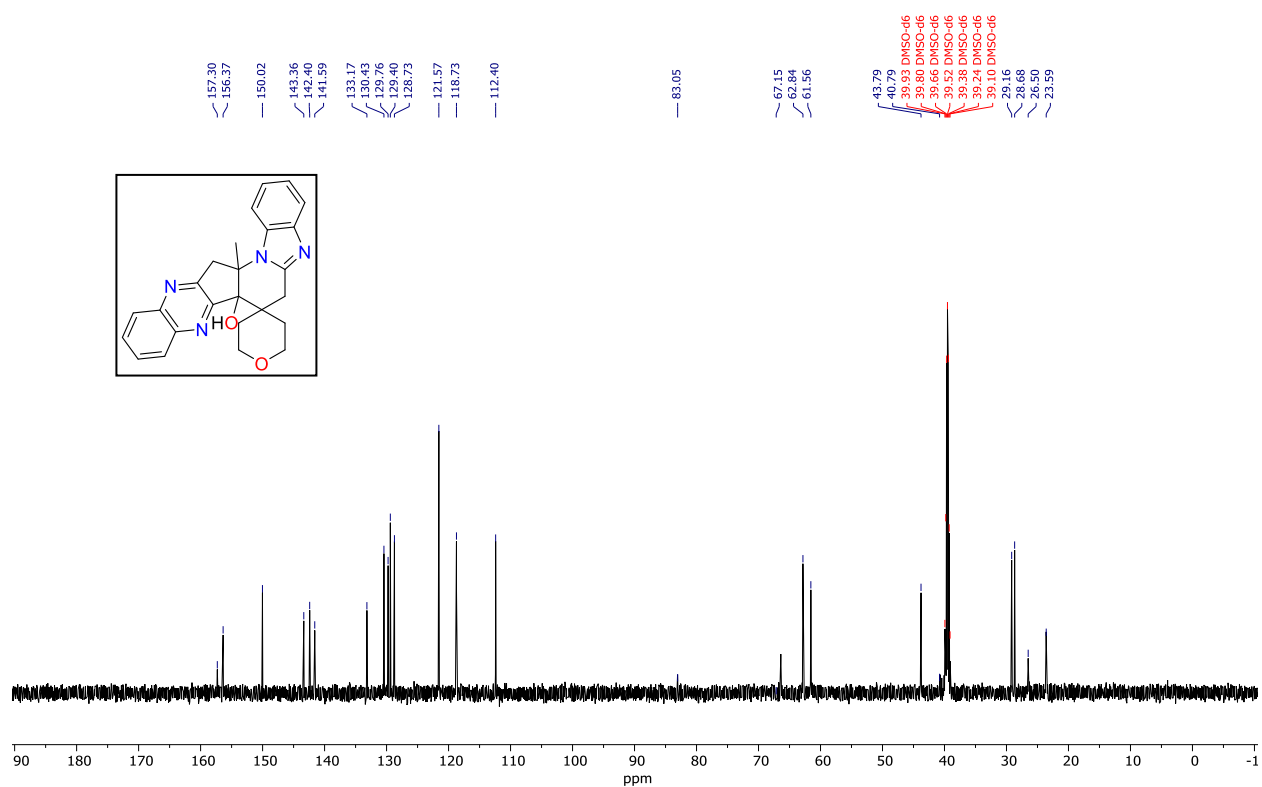

$^1\text{H}$  NMR spectrum (300 MHz) of **13a** in  $\text{DMSO-}d_6$

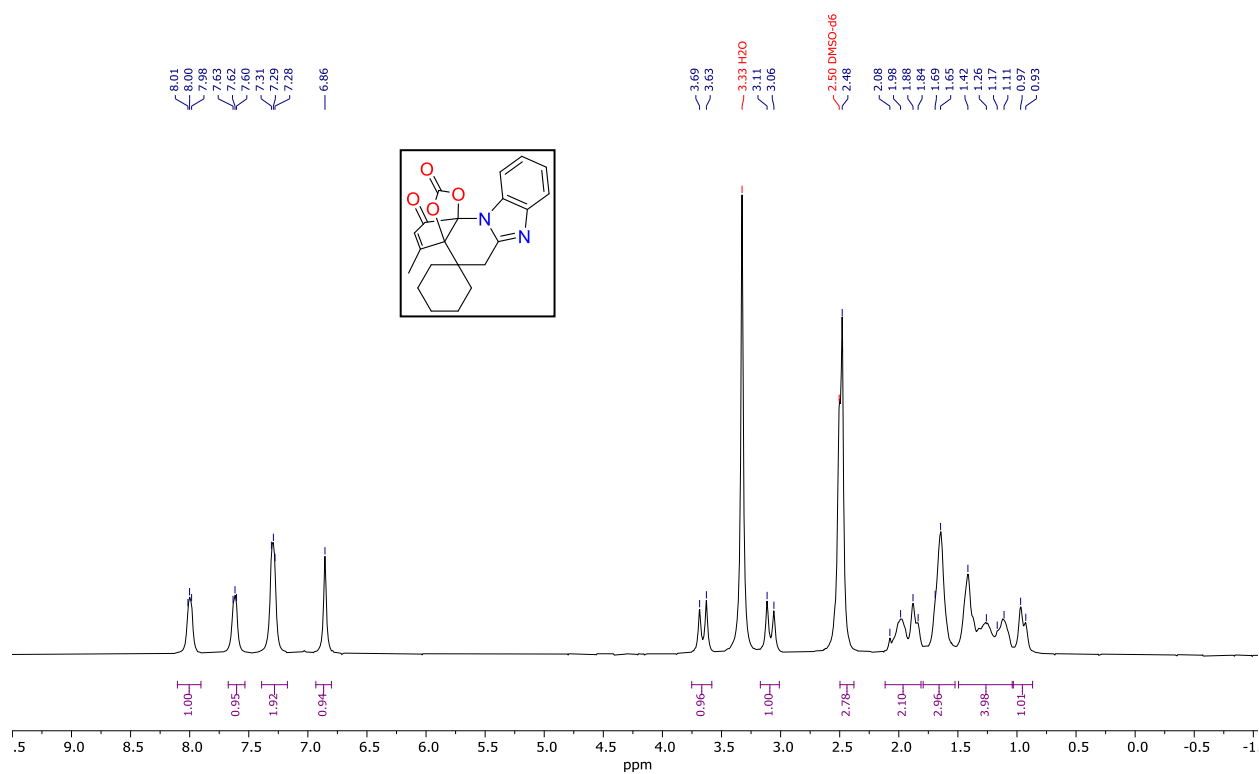

$^{13}\text{C}$   $\{^1\text{H}\}$  NMR spectrum (151 MHz) of **13a** in  $\text{DMSO-}d_6$

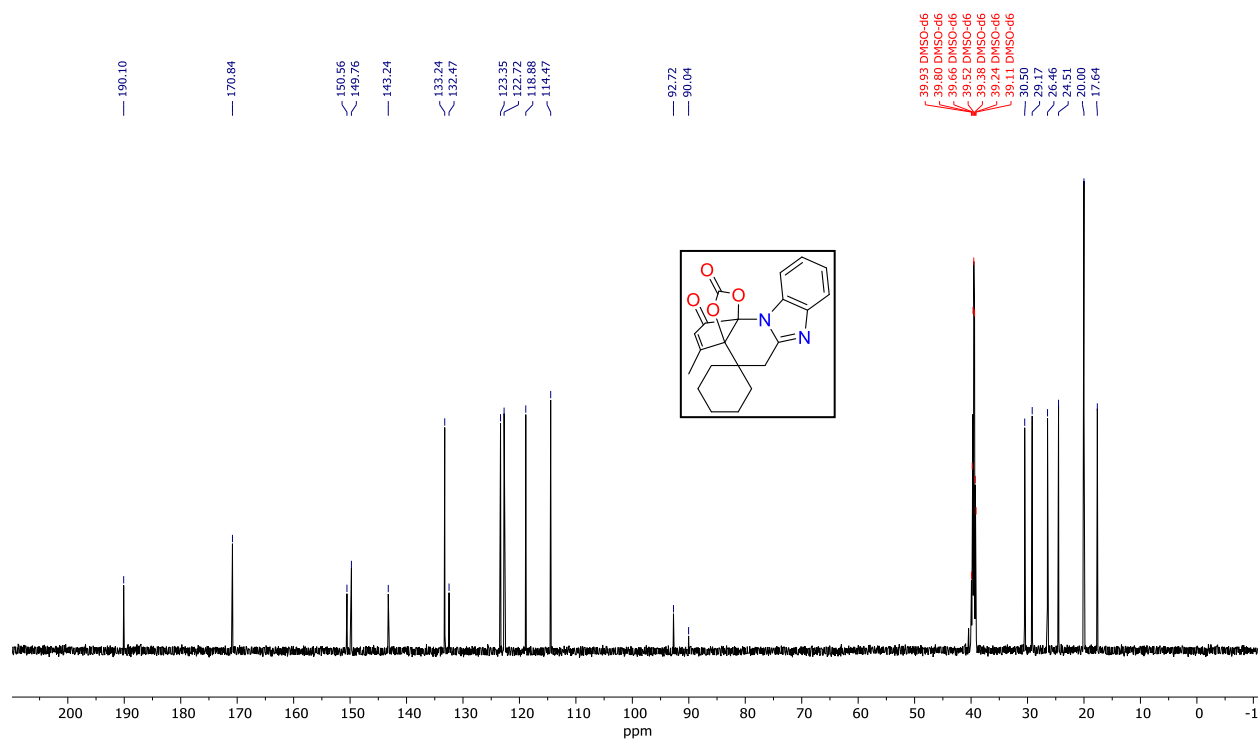



$^1\text{H}$  NMR spectrum (300 MHz) of **13b** in  $\text{DMSO-}d_6$

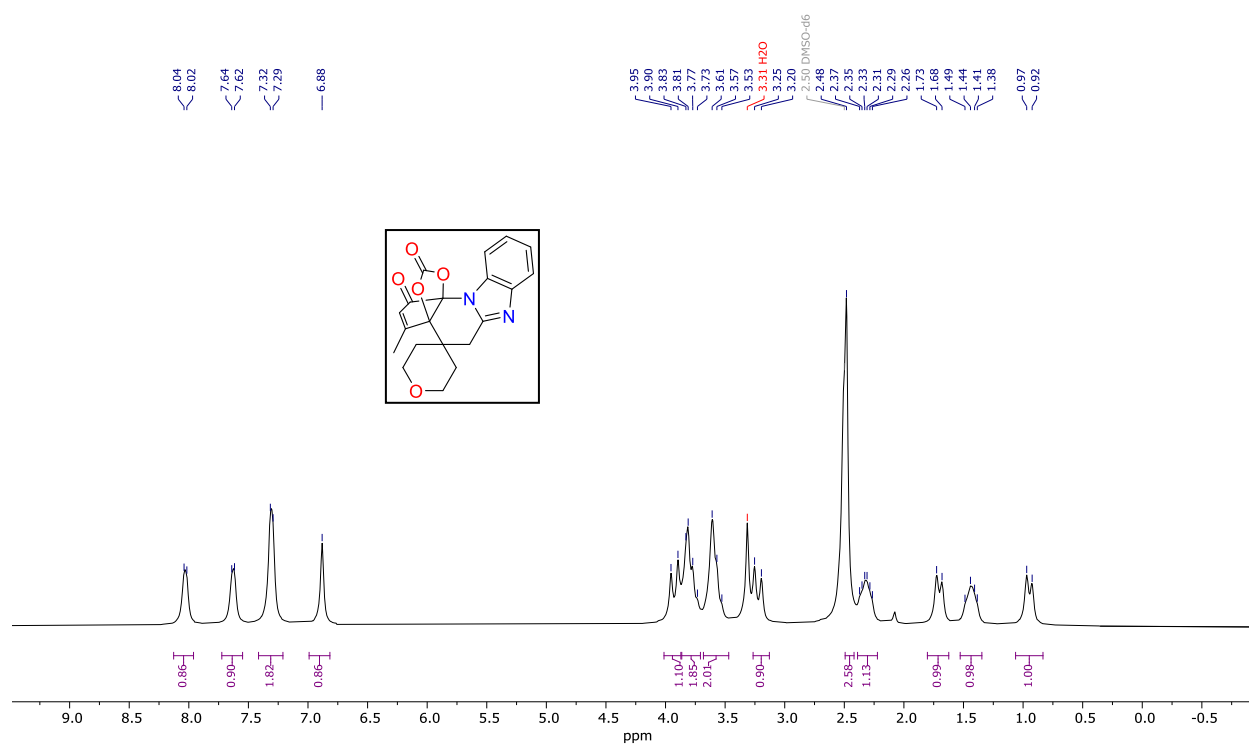

$^{13}\text{C}$   $\{^1\text{H}\}$  NMR spectrum (151 MHz) of **13b** in  $\text{DMSO-}d_6$

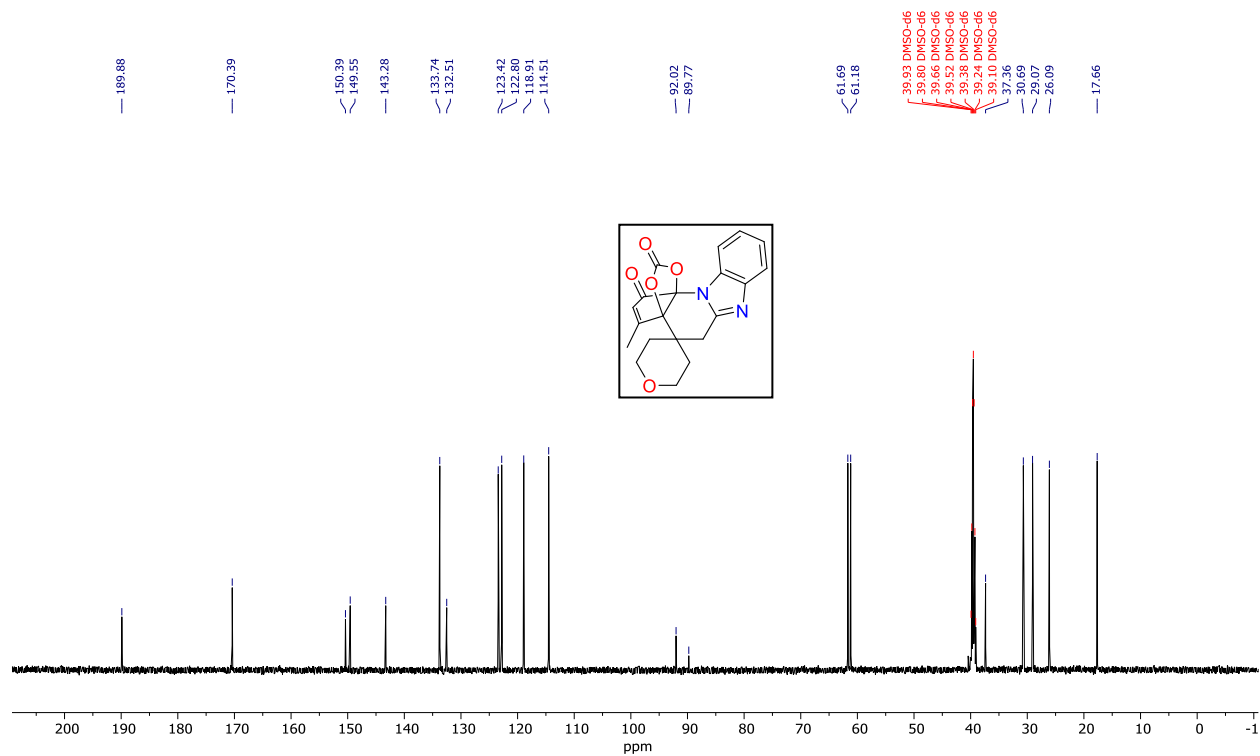

## 5. Copies of HRMS for all compounds

### HRMS for compound **3a**

| Acquisition Parameter |            |                      |          |                  |           |
|-----------------------|------------|----------------------|----------|------------------|-----------|
| Source Type           | ESI        | Ion Polarity         | Positive | Set Nebulizer    | 0.4 Bar   |
| Focus                 | Not active |                      |          | Set Dry Heater   | 180 °C    |
| Scan Begin            | 50 m/z     | Set Capillary        | 4500 V   | Set Dry Gas      | 4.0 l/min |
| Scan End              | 3000 m/z   | Set End Plate Offset | -500 V   | Set Divert Valve | Waste     |

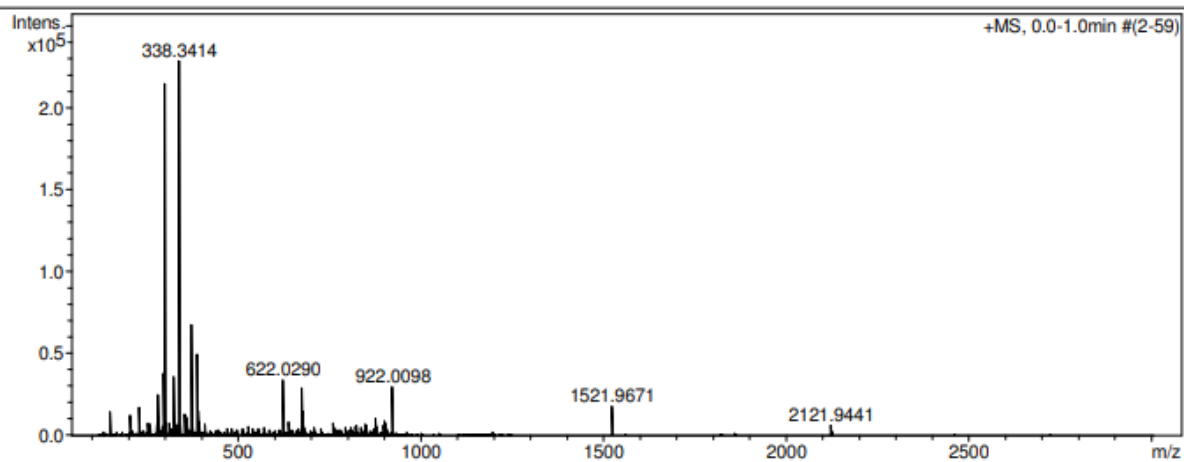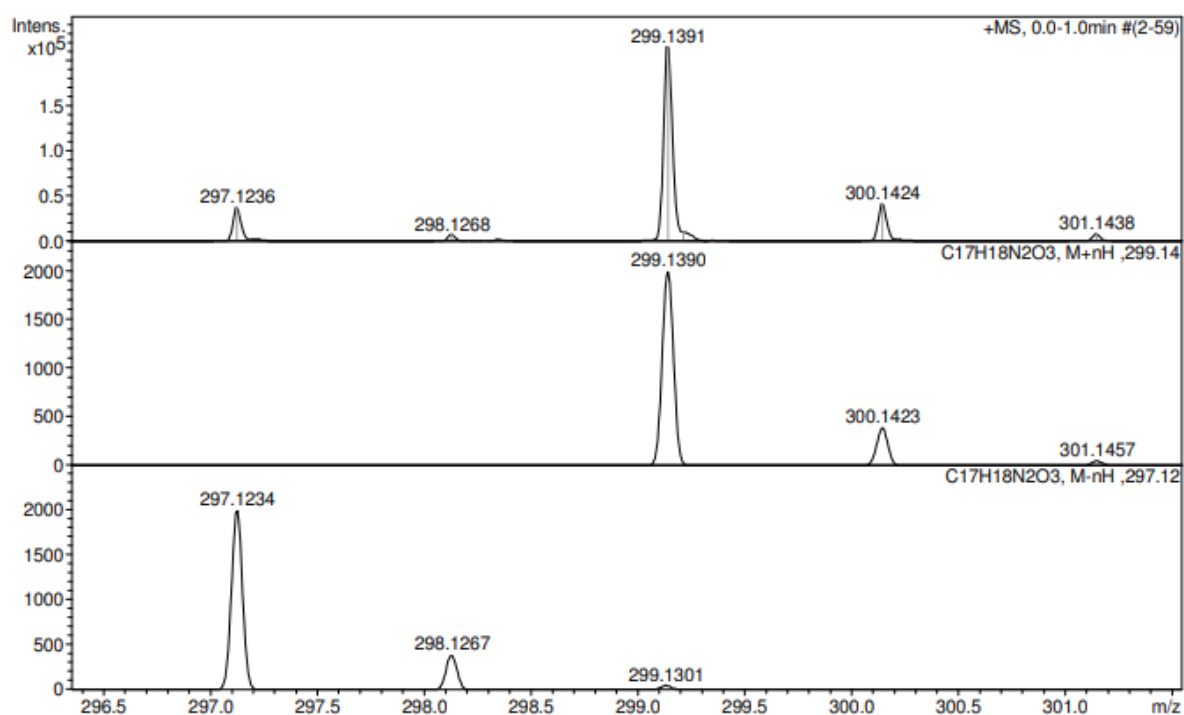

# HRMS for compound **3b**

## Acquisition Parameter

|             |            |                      |          |                  |           |
|-------------|------------|----------------------|----------|------------------|-----------|
| Source Type | ESI        | Ion Polarity         | Positive | Set Nebulizer    | 0.4 Bar   |
| Focus       | Not active |                      |          | Set Dry Heater   | 180 °C    |
| Scan Begin  | 50 m/z     | Set Capillary        | 4500 V   | Set Dry Gas      | 4.0 l/min |
| Scan End    | 3000 m/z   | Set End Plate Offset | -500 V   | Set Divert Valve | Waste     |

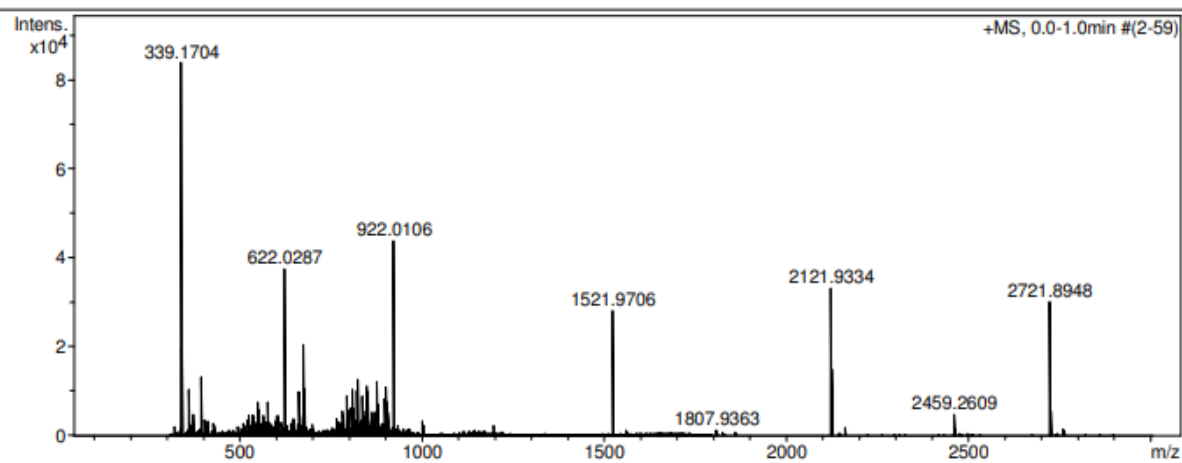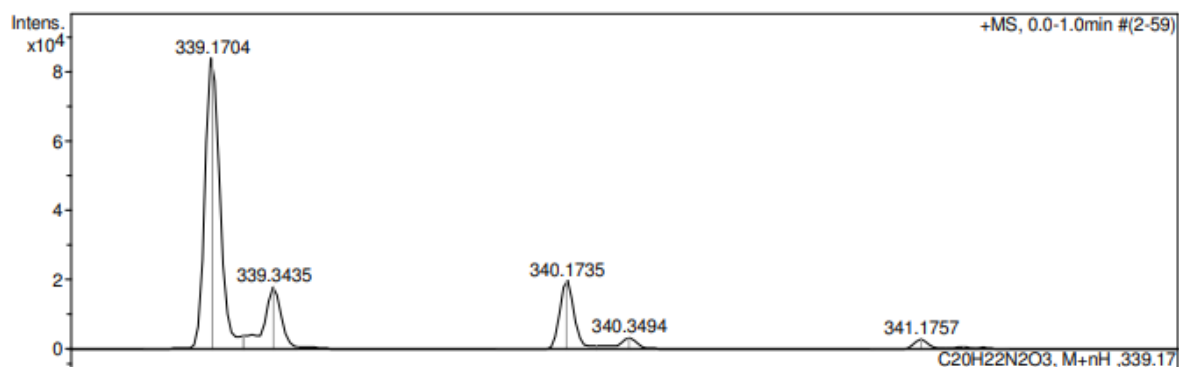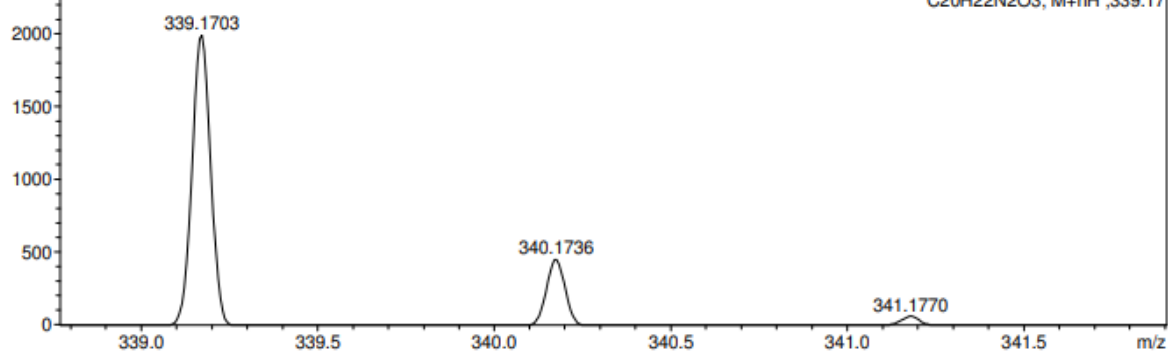

# HRMS for compound 3c

## Acquisition Parameter

|             |            |                      |          |                  |           |
|-------------|------------|----------------------|----------|------------------|-----------|
| Source Type | ESI        | Ion Polarity         | Positive | Set Nebulizer    | 0.4 Bar   |
| Focus       | Not active |                      |          | Set Dry Heater   | 180 °C    |
| Scan Begin  | 50 m/z     | Set Capillary        | 4500 V   | Set Dry Gas      | 4.0 l/min |
| Scan End    | 3000 m/z   | Set End Plate Offset | -500 V   | Set Divert Valve | Waste     |

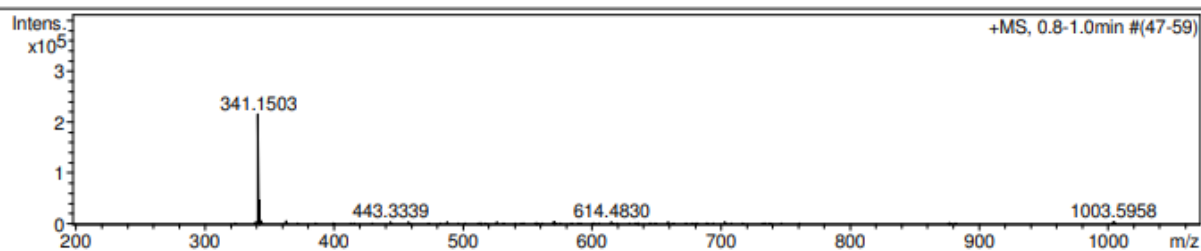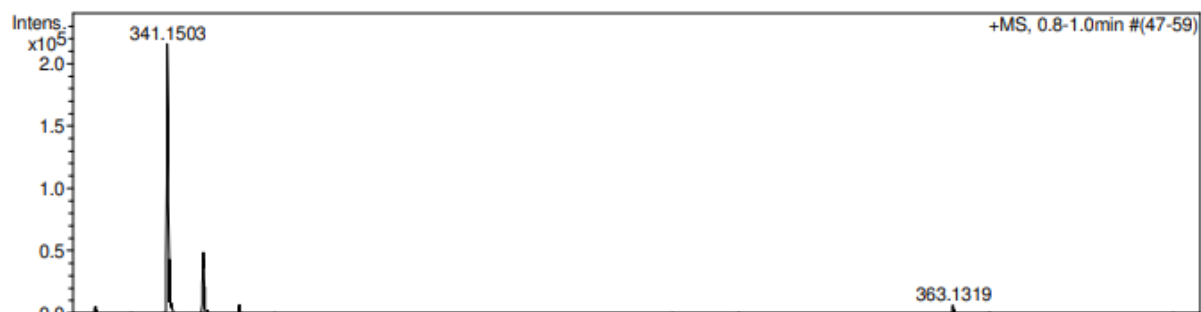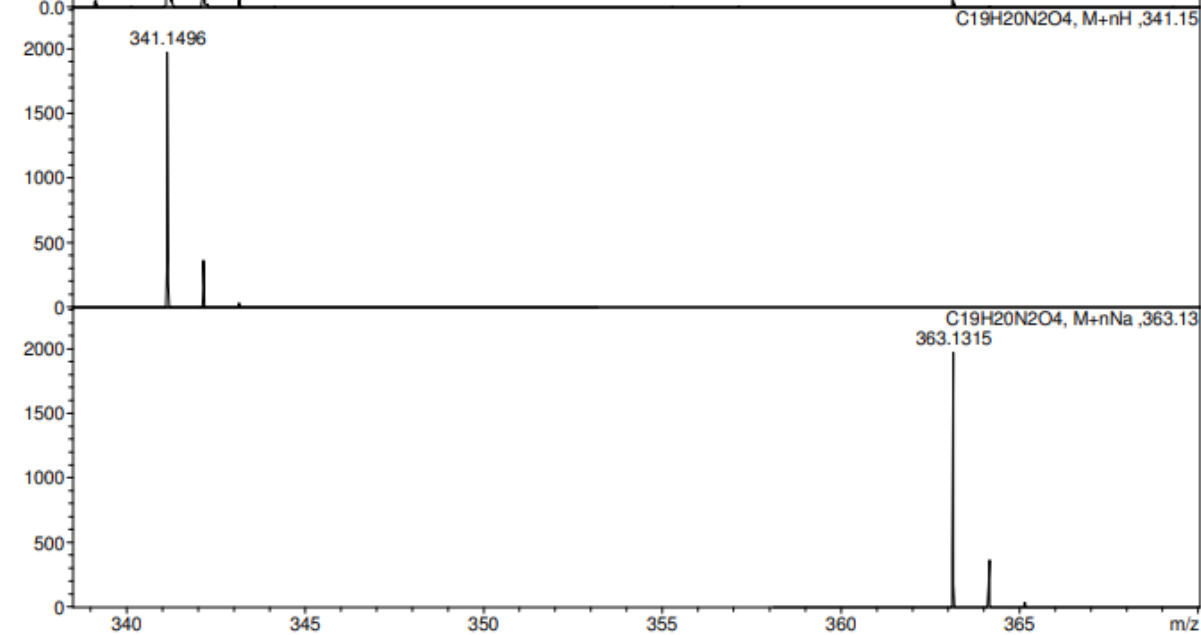

# HRMS for compound 3d

## Acquisition Parameter

|             |            |                      |          |                  |           |
|-------------|------------|----------------------|----------|------------------|-----------|
| Source Type | ESI        | Ion Polarity         | Positive | Set Nebulizer    | 0.4 Bar   |
| Focus       | Not active |                      |          | Set Dry Heater   | 180 °C    |
| Scan Begin  | 50 m/z     | Set Capillary        | 4500 V   | Set Dry Gas      | 4.0 l/min |
| Scan End    | 2500 m/z   | Set End Plate Offset | -500 V   | Set Divert Valve | Waste     |

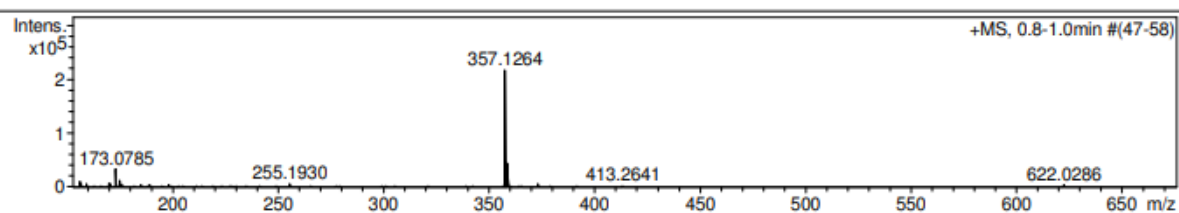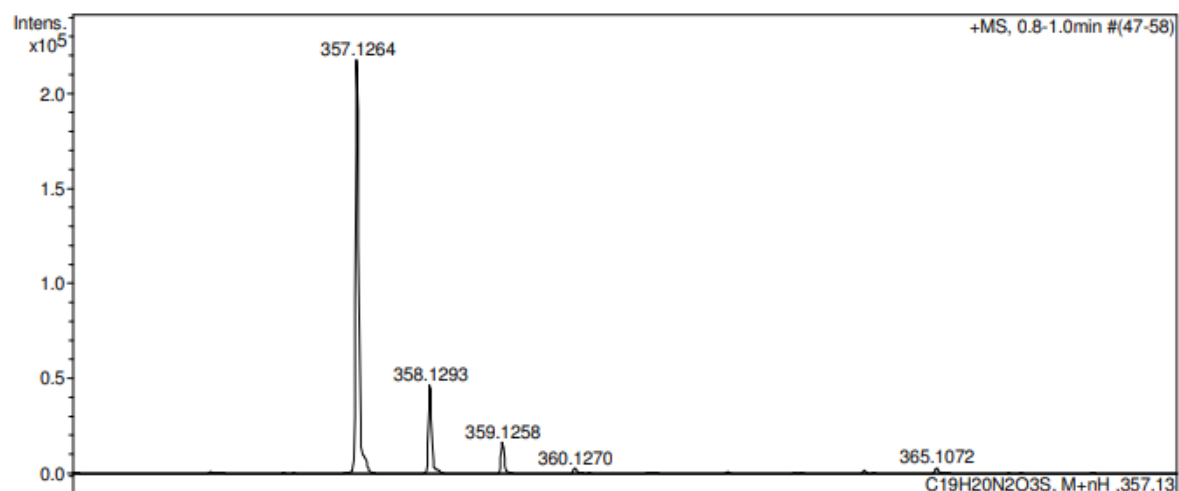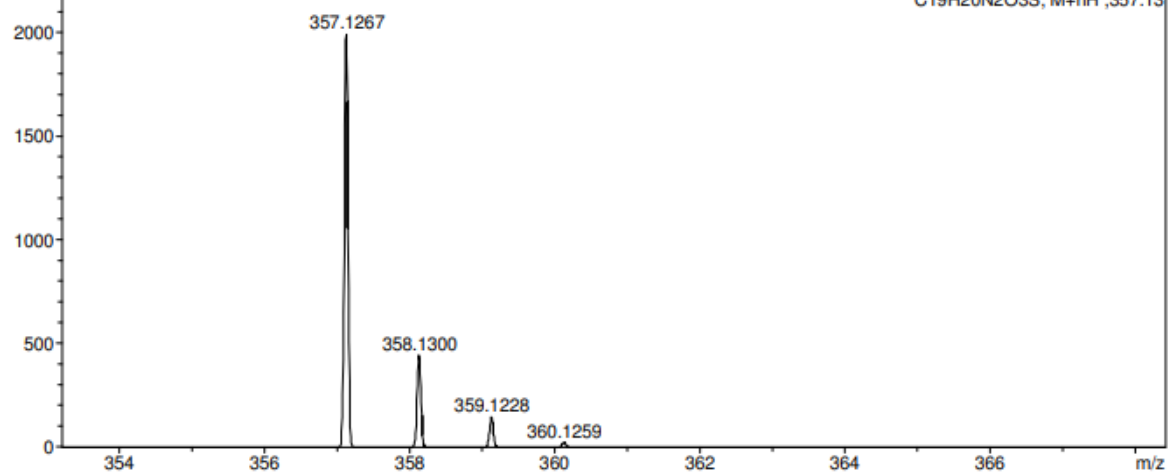

# HRMS for compound 3e

## Acquisition Parameter

|             |            |                      |          |                  |           |
|-------------|------------|----------------------|----------|------------------|-----------|
| Source Type | ESI        | Ion Polarity         | Positive | Set Nebulizer    | 0.4 Bar   |
| Focus       | Not active |                      |          | Set Dry Heater   | 180 °C    |
| Scan Begin  | 50 m/z     | Set Capillary        | 4500 V   | Set Dry Gas      | 4.0 l/min |
| Scan End    | 3000 m/z   | Set End Plate Offset | -500 V   | Set Divert Valve | Waste     |

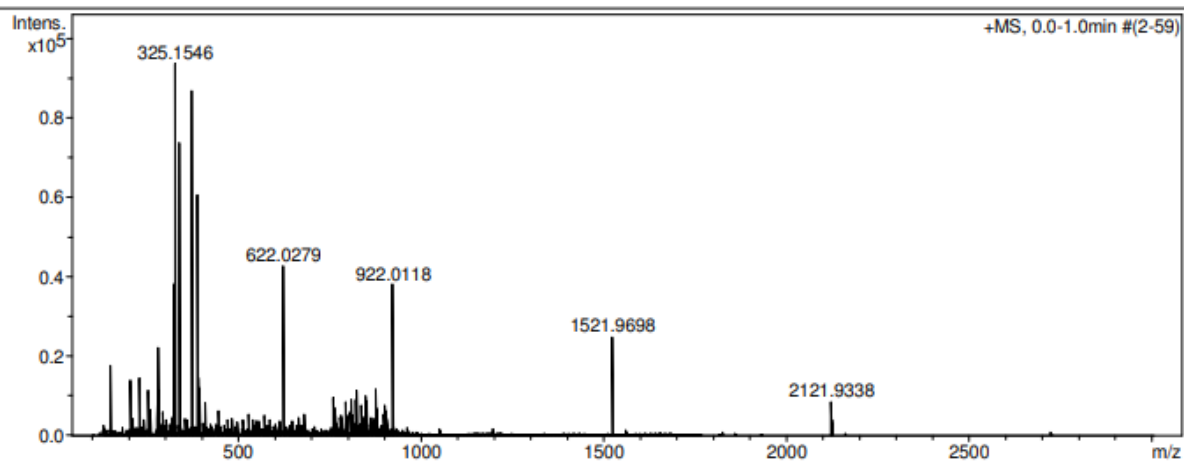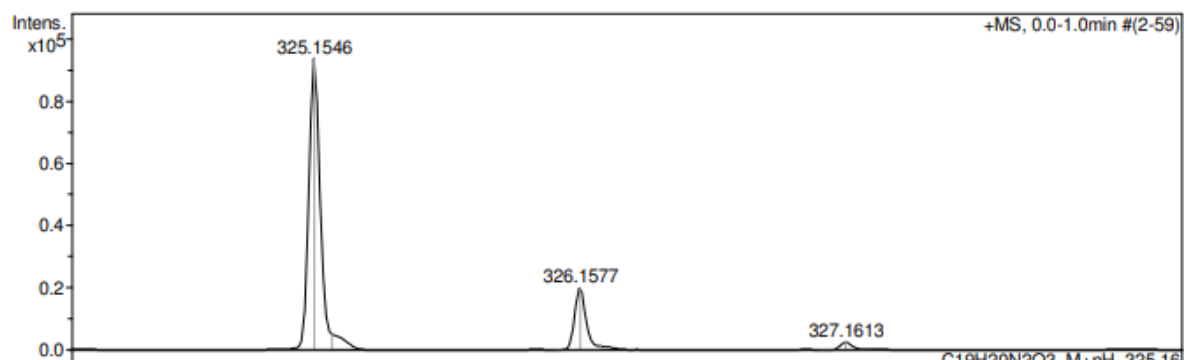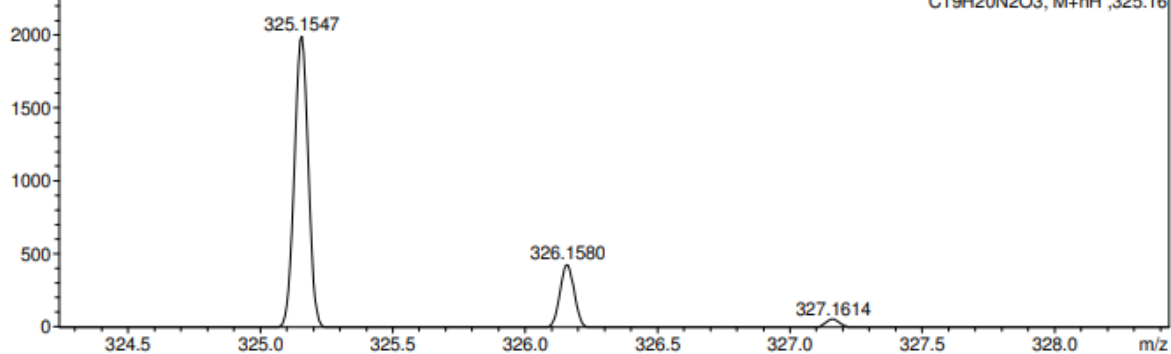

# HRMS for mixture of isomers **4a** and **5a**

## Acquisition Parameter

|             |            |                      |          |                  |           |
|-------------|------------|----------------------|----------|------------------|-----------|
| Source Type | ESI        | Ion Polarity         | Positive | Set Nebulizer    | 0.4 Bar   |
| Focus       | Not active |                      |          | Set Dry Heater   | 180 °C    |
| Scan Begin  | 50 m/z     | Set Capillary        | 4500 V   | Set Dry Gas      | 4.0 l/min |
| Scan End    | 2500 m/z   | Set End Plate Offset | -500 V   | Set Divert Valve | Waste     |

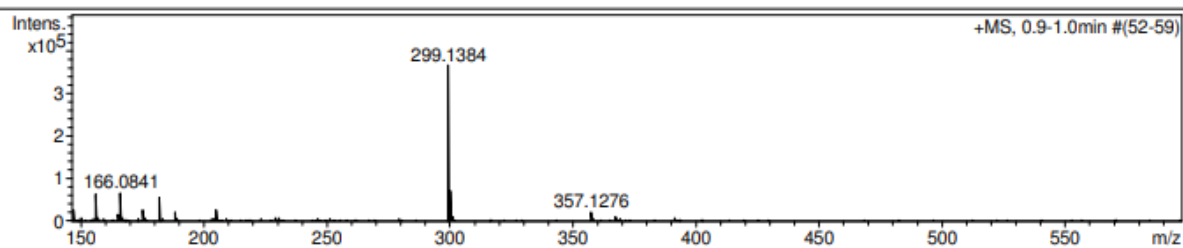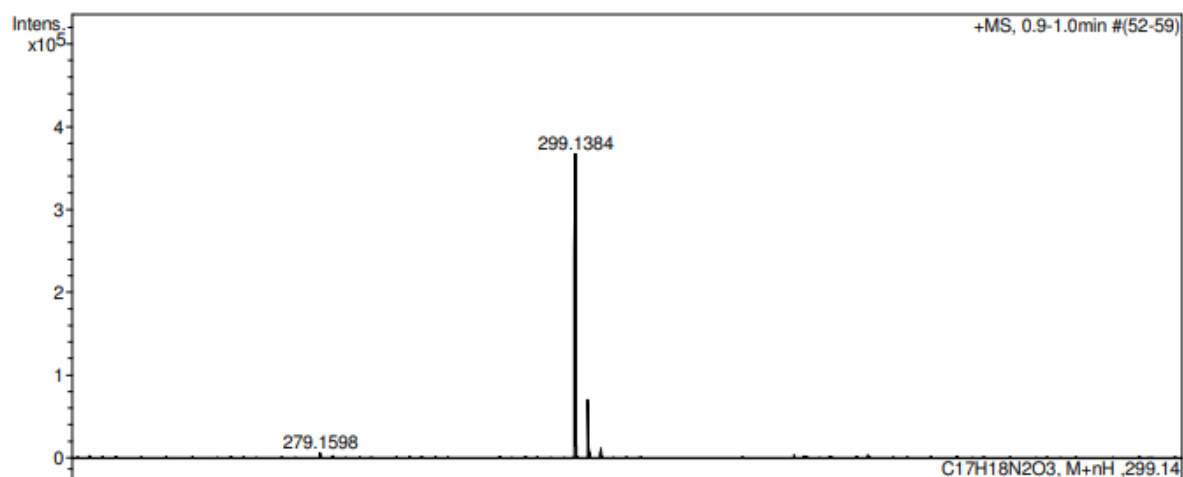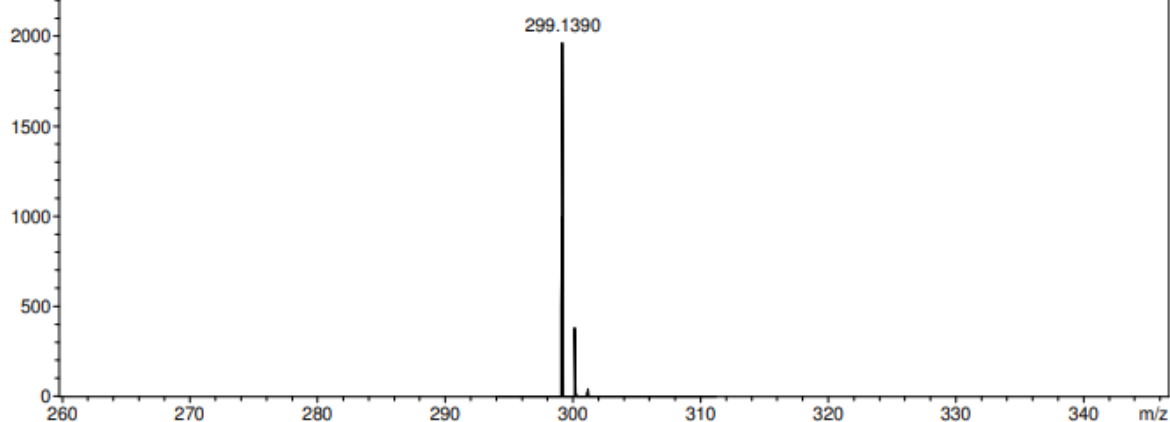

# HRMS for mixture of isomers **4b** and **5b**

## Acquisition Parameter

|             |            |                      |          |                  |           |
|-------------|------------|----------------------|----------|------------------|-----------|
| Source Type | ESI        | Ion Polarity         | Positive | Set Nebulizer    | 0.4 Bar   |
| Focus       | Not active |                      |          | Set Dry Heater   | 180 °C    |
| Scan Begin  | 50 m/z     | Set Capillary        | 4500 V   | Set Dry Gas      | 4.0 l/min |
| Scan End    | 2500 m/z   | Set End Plate Offset | -500 V   | Set Divert Valve | Waste     |

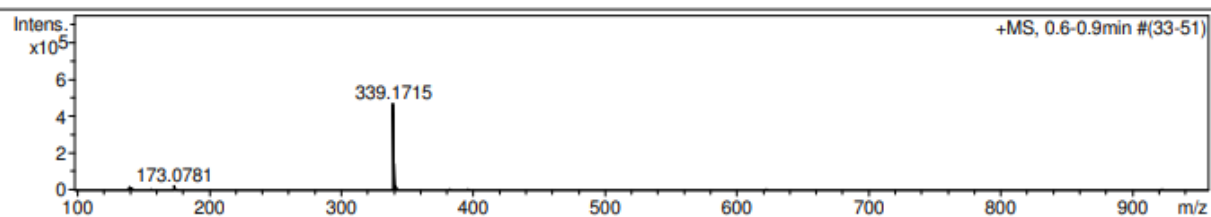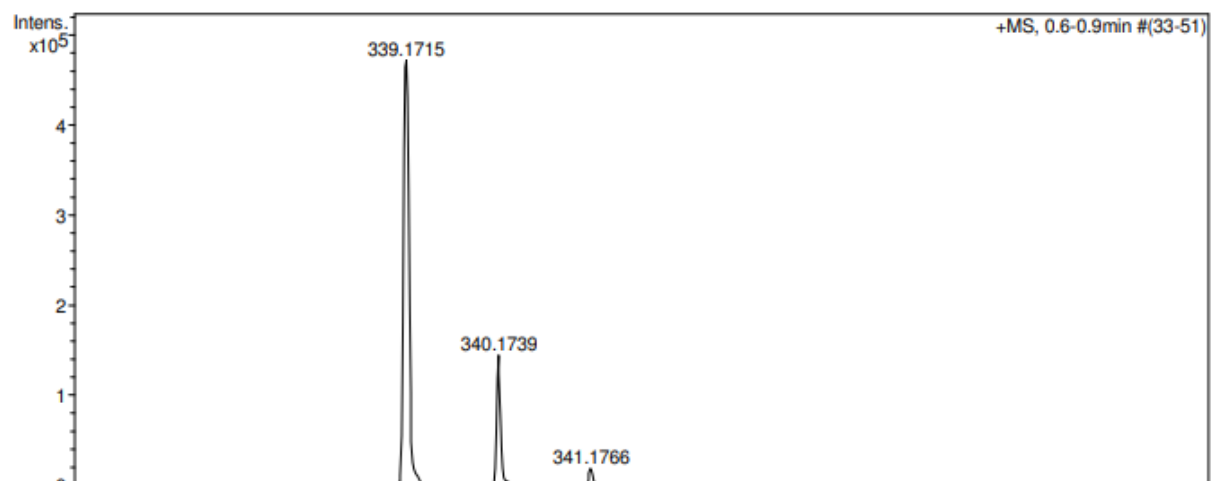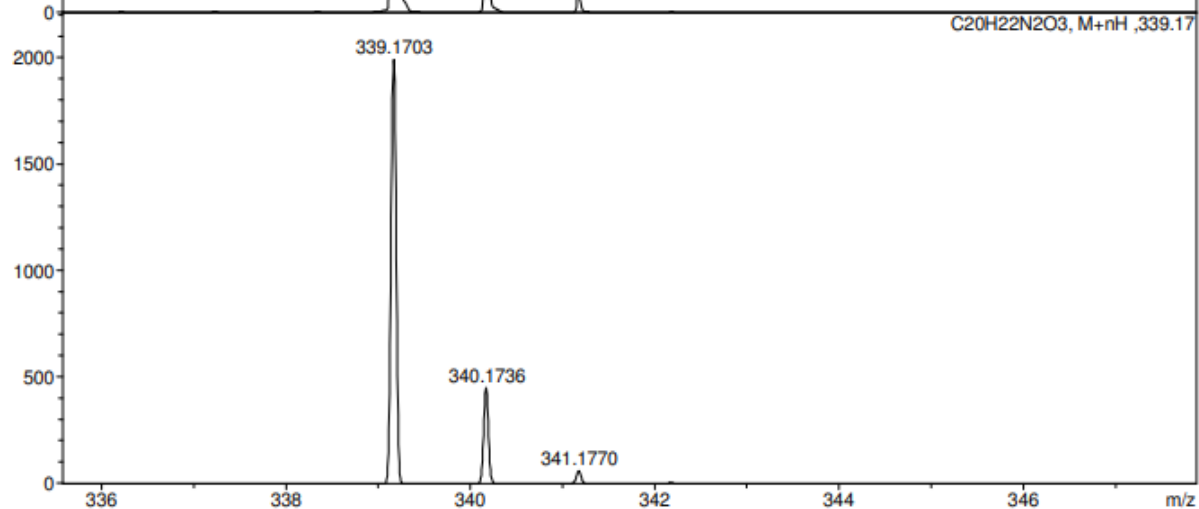



HRMS for mixture of isomers **4c** and **5c**

**Acquisition Parameter**

|             |            |                      |          |                  |           |
|-------------|------------|----------------------|----------|------------------|-----------|
| Source Type | ESI        | Ion Polarity         | Positive | Set Nebulizer    | 0.4 Bar   |
| Focus       | Not active |                      |          | Set Dry Heater   | 180 °C    |
| Scan Begin  | 50 m/z     | Set Capillary        | 4500 V   | Set Dry Gas      | 4.0 l/min |
| Scan End    | 3000 m/z   | Set End Plate Offset | -500 V   | Set Divert Valve | Waste     |

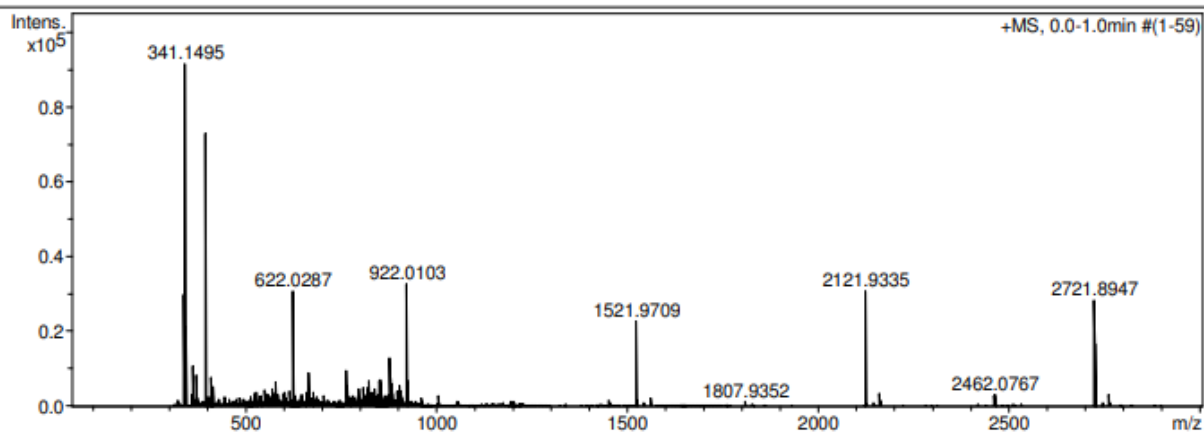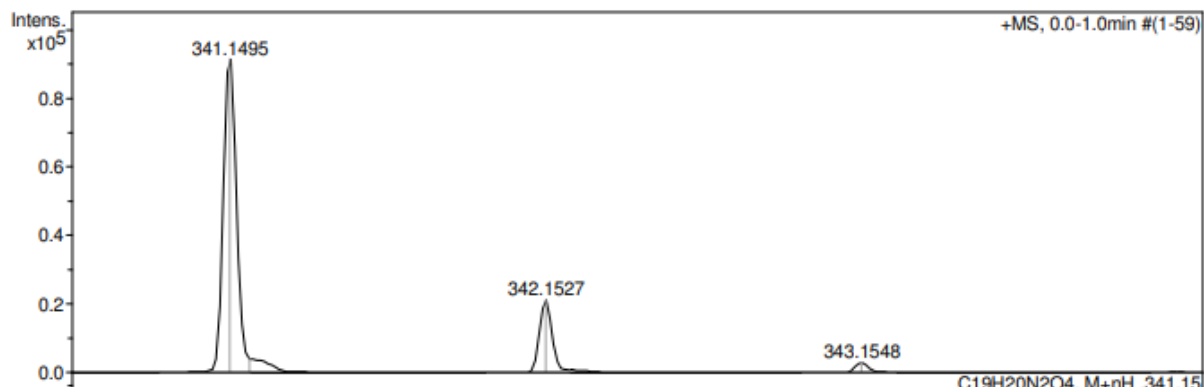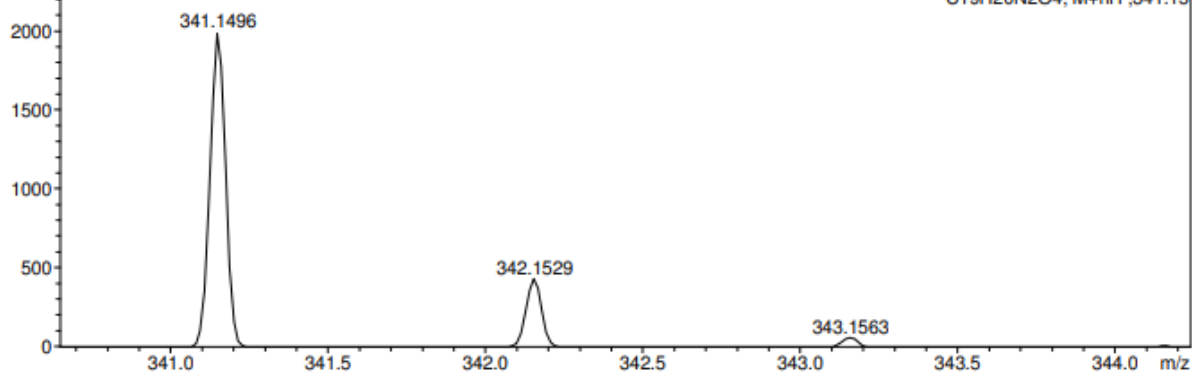

HRMS for mixture of isomers **4d** and **5d**

**Acquisition Parameter**

|             |            |                      |          |                  |           |
|-------------|------------|----------------------|----------|------------------|-----------|
| Source Type | ESI        | Ion Polarity         | Positive | Set Nebulizer    | 0.4 Bar   |
| Focus       | Not active |                      |          | Set Dry Heater   | 180 °C    |
| Scan Begin  | 50 m/z     | Set Capillary        | 4500 V   | Set Dry Gas      | 4.0 l/min |
| Scan End    | 3000 m/z   | Set End Plate Offset | -500 V   | Set Divert Valve | Waste     |

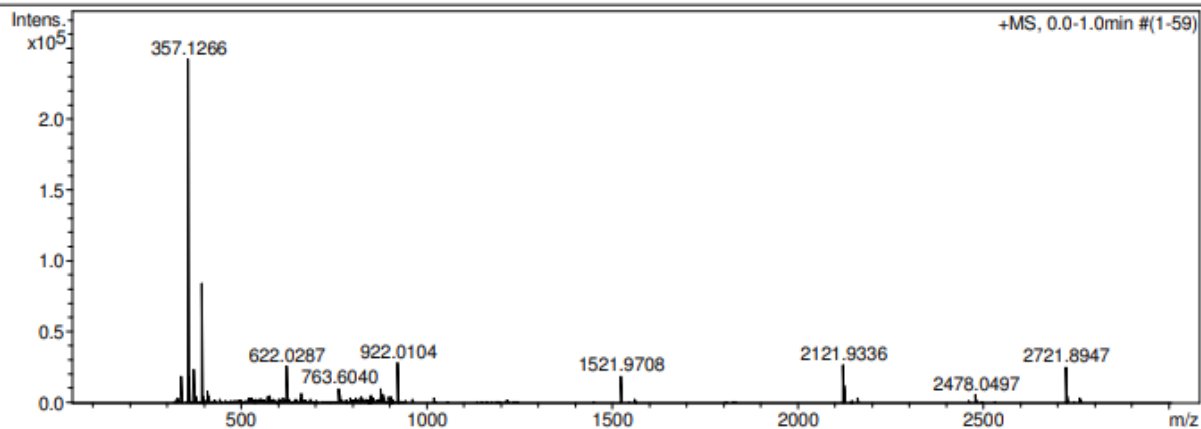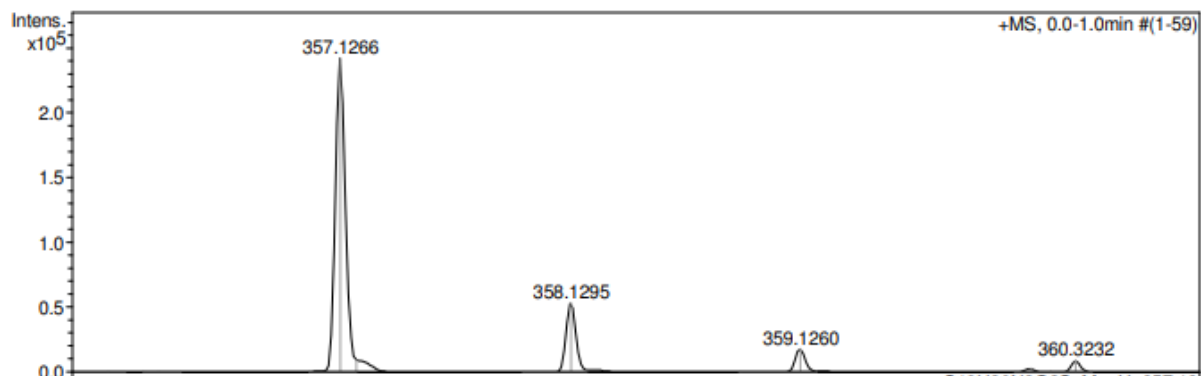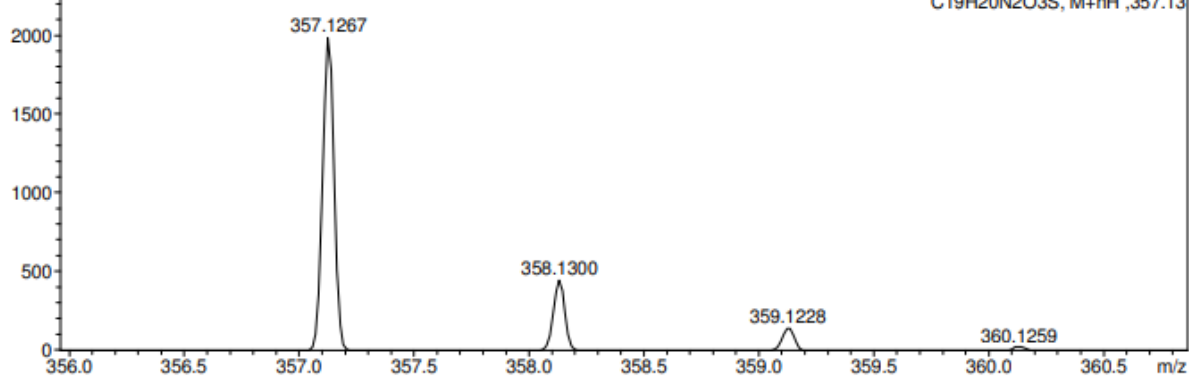

# HRMS for mixture of isomers **4e** and **5e**

## Acquisition Parameter

|             |            |                      |          |                  |           |
|-------------|------------|----------------------|----------|------------------|-----------|
| Source Type | ESI        | Ion Polarity         | Positive | Set Nebulizer    | 0.4 Bar   |
| Focus       | Not active |                      |          | Set Dry Heater   | 180 °C    |
| Scan Begin  | 50 m/z     | Set Capillary        | 4500 V   | Set Dry Gas      | 4.0 l/min |
| Scan End    | 2500 m/z   | Set End Plate Offset | -500 V   | Set Divert Valve | Waste     |

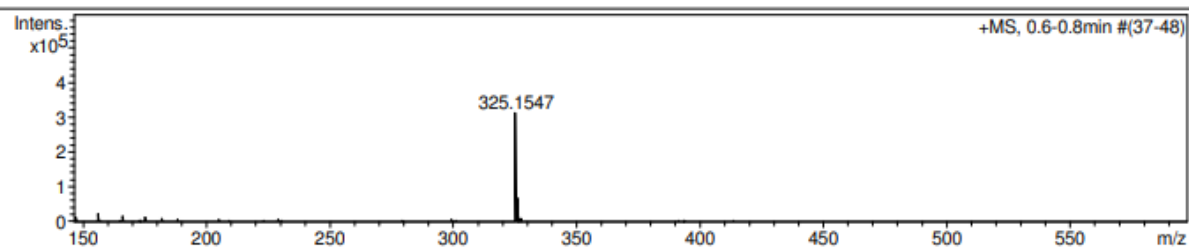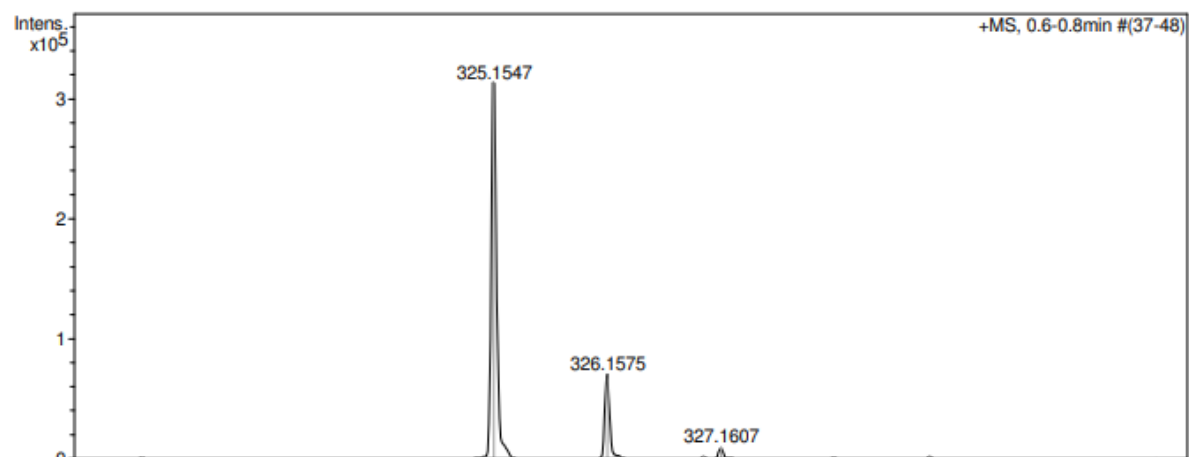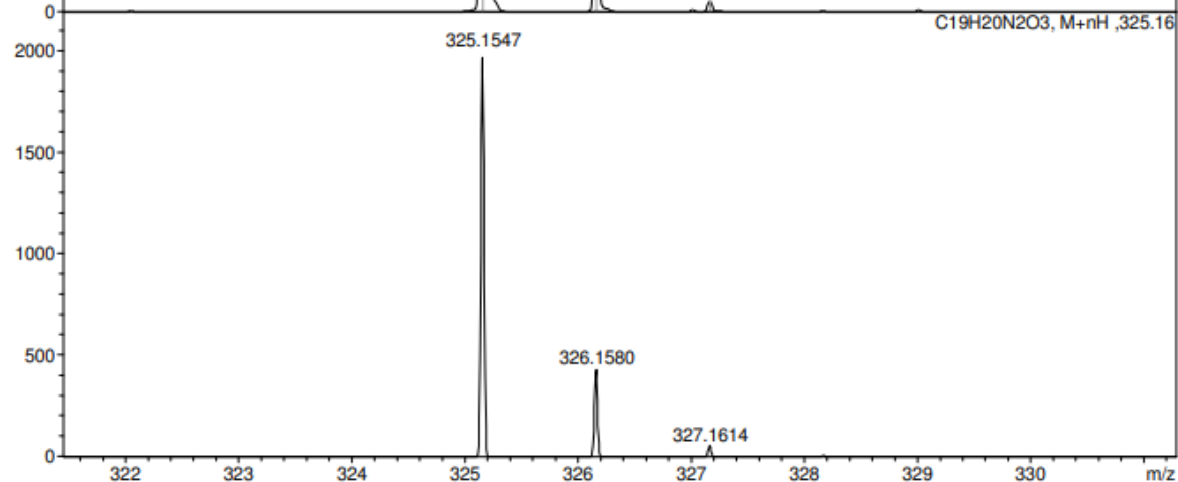

# HRMS for compound 10a

## Acquisition Parameter

|             |            |                      |          |                  |           |
|-------------|------------|----------------------|----------|------------------|-----------|
| Source Type | ESI        | Ion Polarity         | Positive | Set Nebulizer    | 0.4 Bar   |
| Focus       | Not active |                      |          | Set Dry Heater   | 180 °C    |
| Scan Begin  | 50 m/z     | Set Capillary        | 4500 V   | Set Dry Gas      | 4.0 l/min |
| Scan End    | 2500 m/z   | Set End Plate Offset | -500 V   | Set Divert Valve | Waste     |

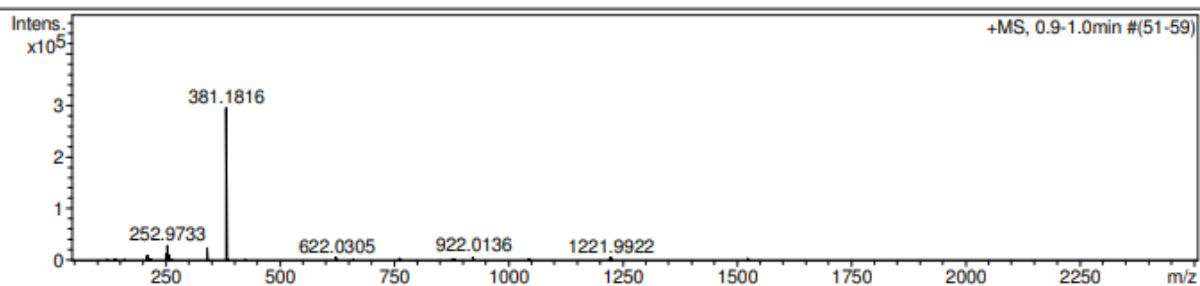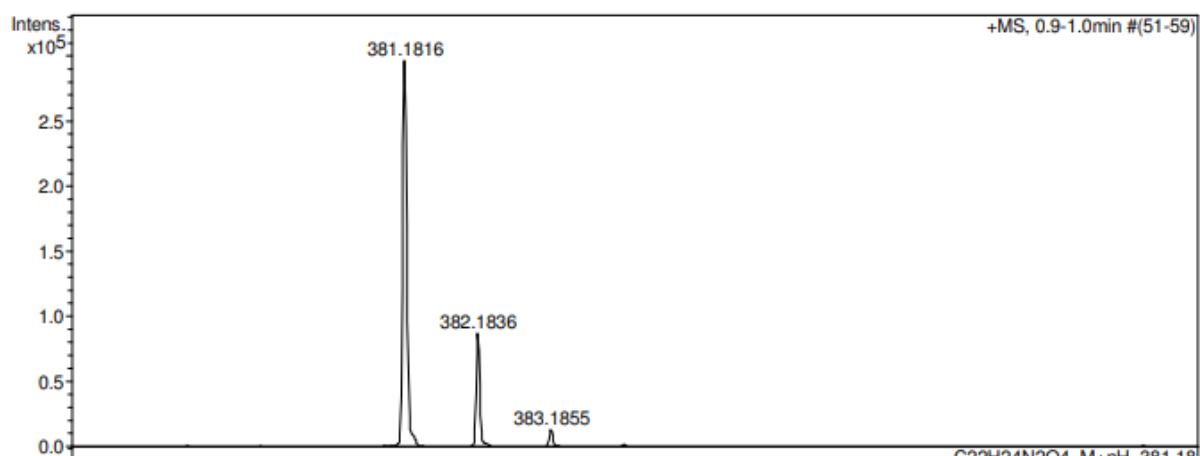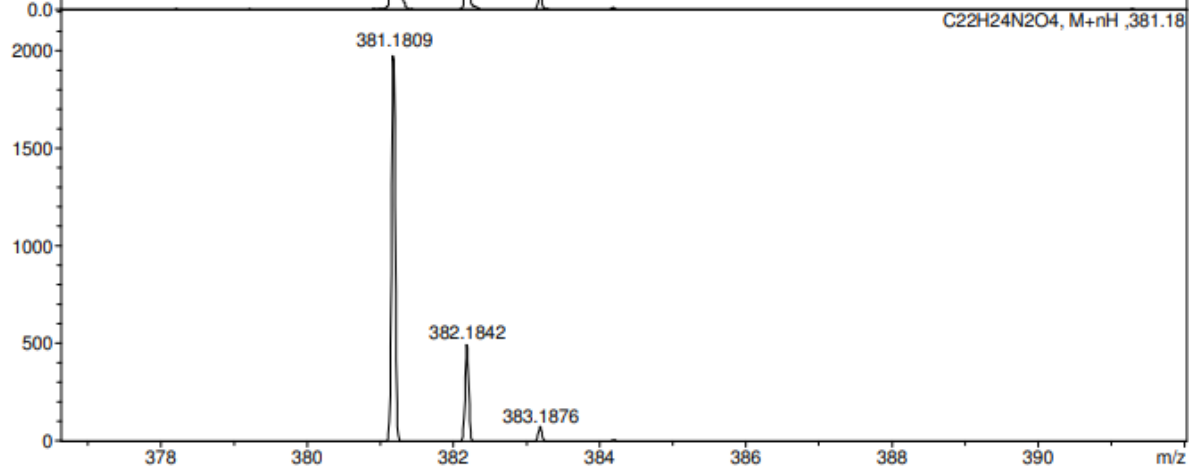

# HRMS for compound 10b

## Acquisition Parameter

|             |            |                      |          |                  |           |
|-------------|------------|----------------------|----------|------------------|-----------|
| Source Type | ESI        | Ion Polarity         | Positive | Set Nebulizer    | 0.4 Bar   |
| Focus       | Not active |                      |          | Set Dry Heater   | 180 °C    |
| Scan Begin  | 50 m/z     | Set Capillary        | 4500 V   | Set Dry Gas      | 4.0 l/min |
| Scan End    | 2500 m/z   | Set End Plate Offset | -500 V   | Set Divert Valve | Waste     |

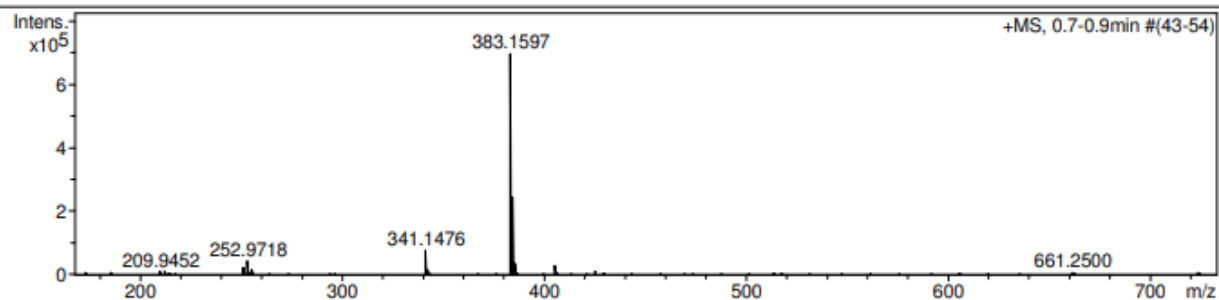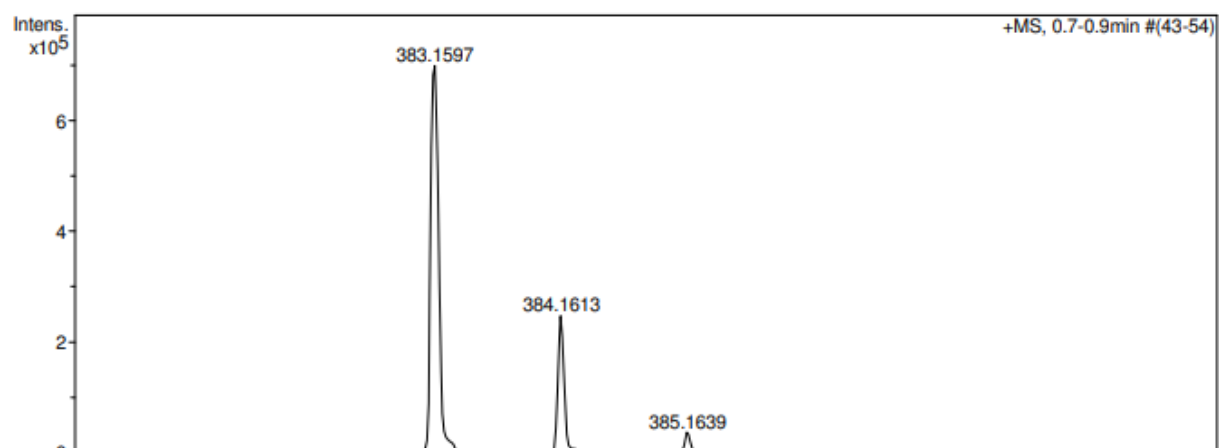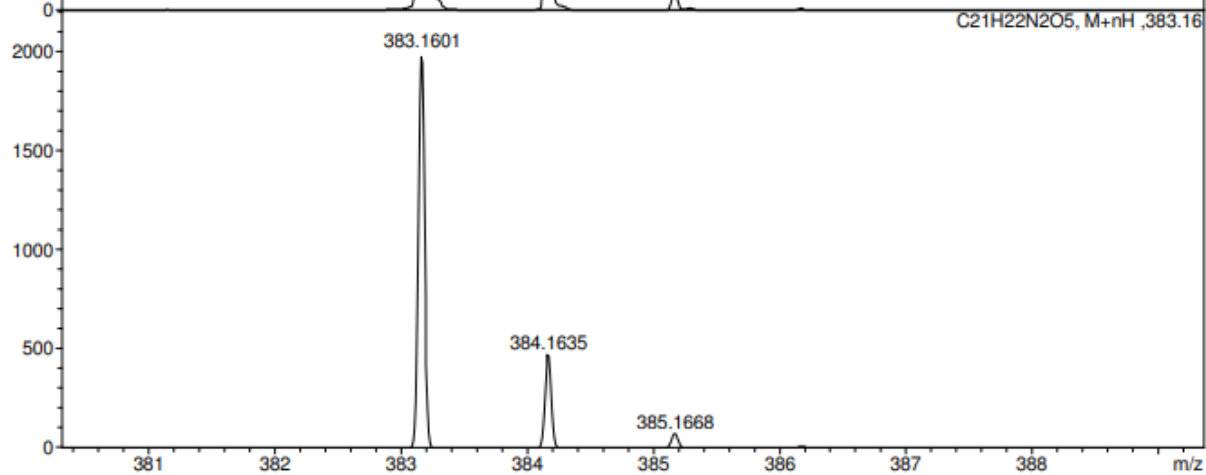

# HRMS for compound 11a

## Acquisition Parameter

|             |            |                      |          |                  |           |
|-------------|------------|----------------------|----------|------------------|-----------|
| Source Type | ESI        | Ion Polarity         | Positive | Set Nebulizer    | 0.4 Bar   |
| Focus       | Not active |                      |          | Set Dry Heater   | 180 °C    |
| Scan Begin  | 50 m/z     | Set Capillary        | 4500 V   | Set Dry Gas      | 4.0 l/min |
| Scan End    | 2500 m/z   | Set End Plate Offset | -500 V   | Set Divert Valve | Waste     |

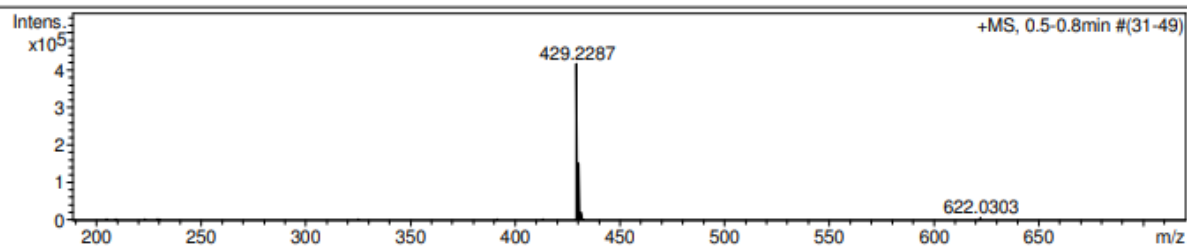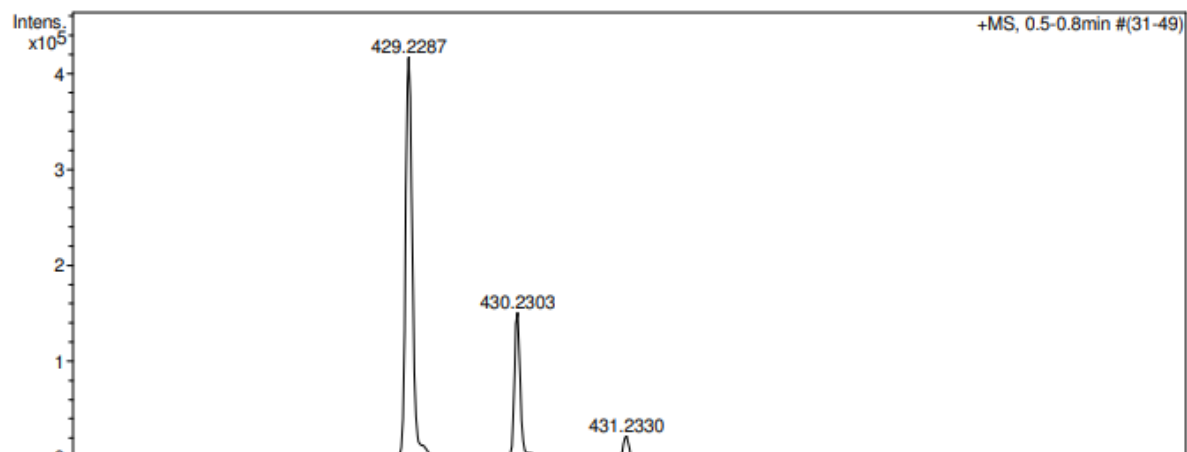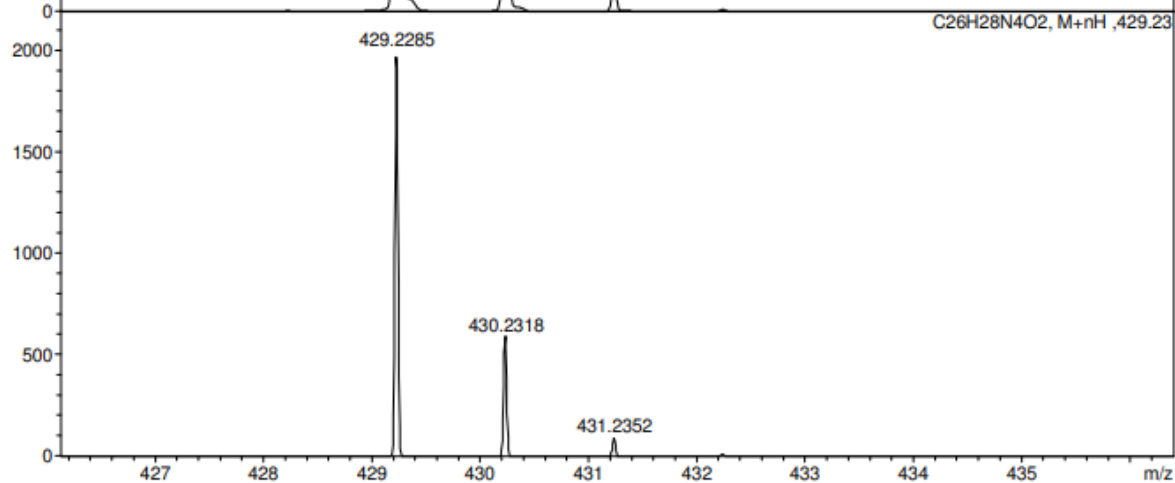

# HRMS for compound 11b

## Acquisition Parameter

|             |            |                      |          |                  |           |
|-------------|------------|----------------------|----------|------------------|-----------|
| Source Type | ESI        | Ion Polarity         | Positive | Set Nebulizer    | 0.4 Bar   |
| Focus       | Not active |                      |          | Set Dry Heater   | 180 °C    |
| Scan Begin  | 50 m/z     | Set Capillary        | 4500 V   | Set Dry Gas      | 4.0 l/min |
| Scan End    | 2500 m/z   | Set End Plate Offset | -500 V   | Set Divert Valve | Waste     |

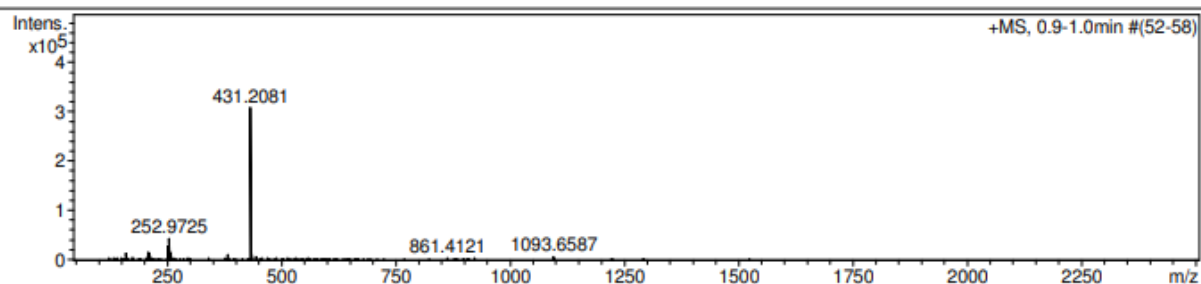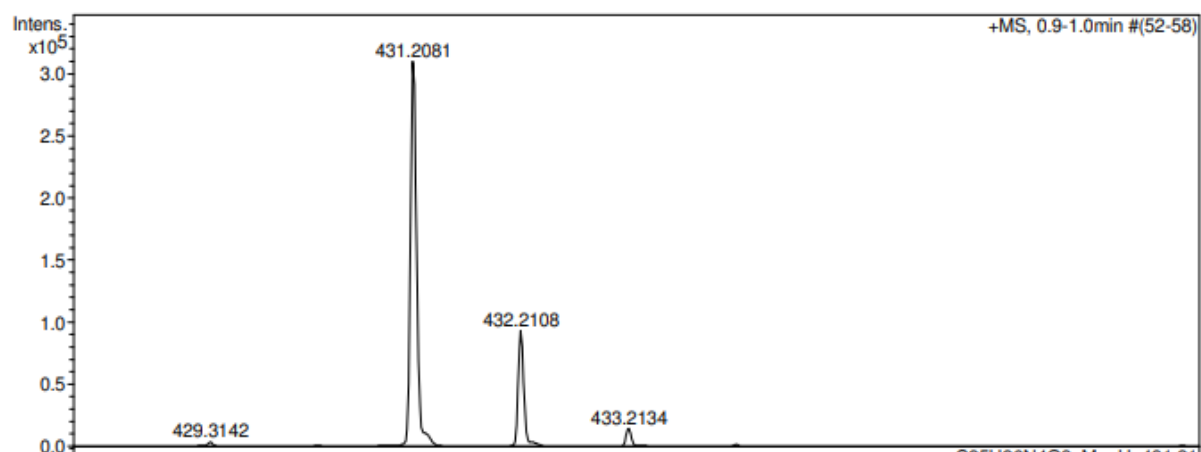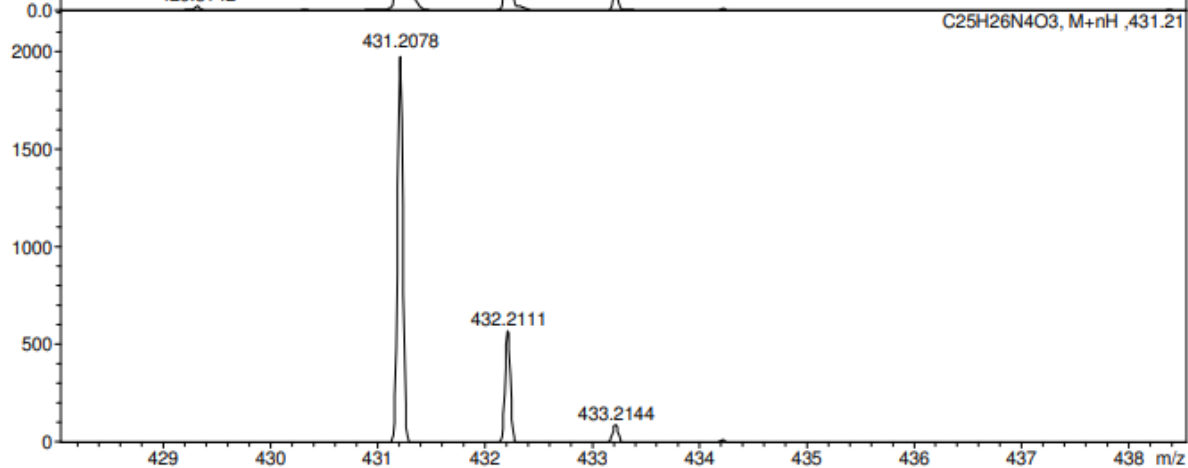

# HRMS for compound 12a

## Acquisition Parameter

|             |            |                      |          |                  |           |
|-------------|------------|----------------------|----------|------------------|-----------|
| Source Type | ESI        | Ion Polarity         | Positive | Set Nebulizer    | 0.4 Bar   |
| Focus       | Not active |                      |          | Set Dry Heater   | 180 °C    |
| Scan Begin  | 50 m/z     | Set Capillary        | 4500 V   | Set Dry Gas      | 4.0 l/min |
| Scan End    | 2500 m/z   | Set End Plate Offset | -500 V   | Set Divert Valve | Waste     |

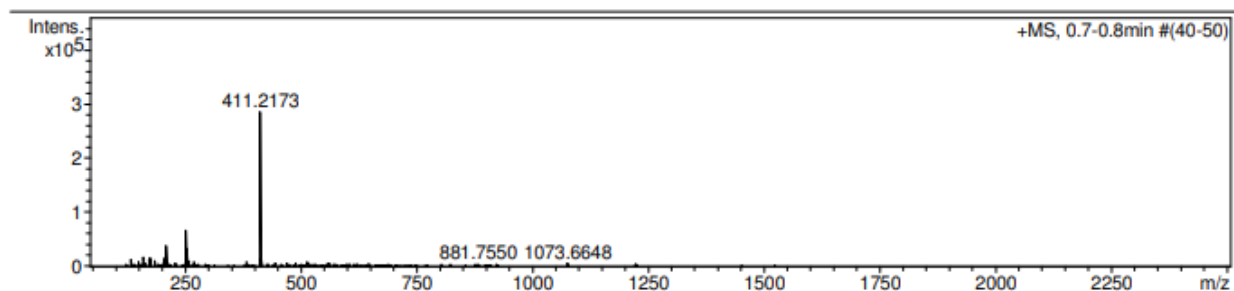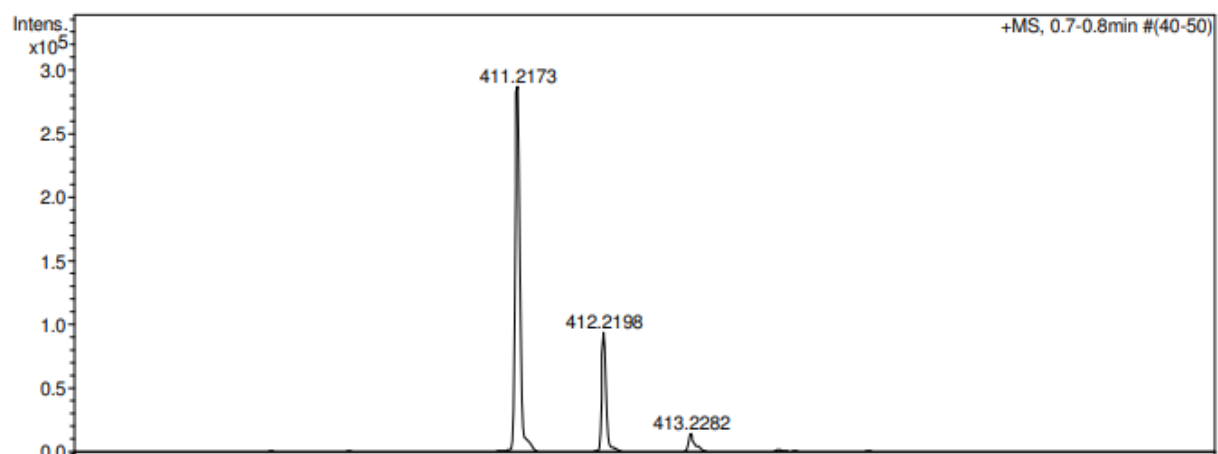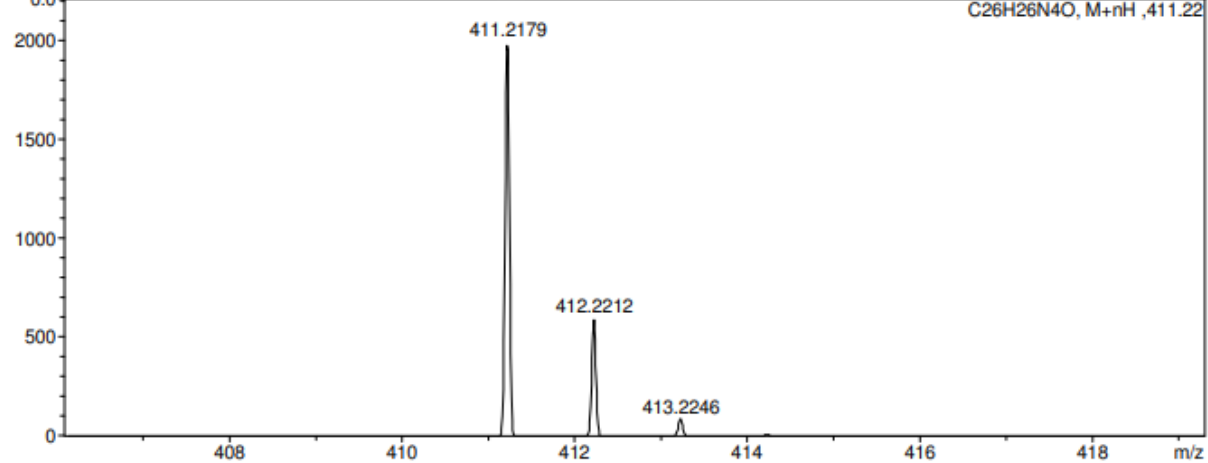



# HRMS for compound 12b

## Acquisition Parameter

|             |            |                      |          |                  |           |
|-------------|------------|----------------------|----------|------------------|-----------|
| Source Type | ESI        | Ion Polarity         | Positive | Set Nebulizer    | 0.4 Bar   |
| Focus       | Not active |                      |          | Set Dry Heater   | 180 °C    |
| Scan Begin  | 50 m/z     | Set Capillary        | 4500 V   | Set Dry Gas      | 4.0 l/min |
| Scan End    | 3000 m/z   | Set End Plate Offset | -500 V   | Set Divert Valve | Waste     |

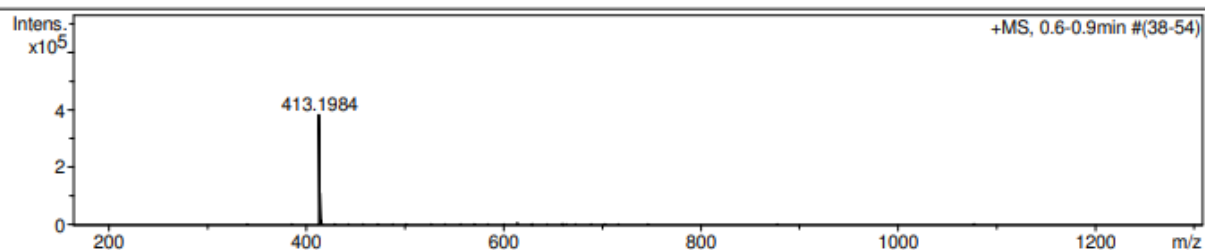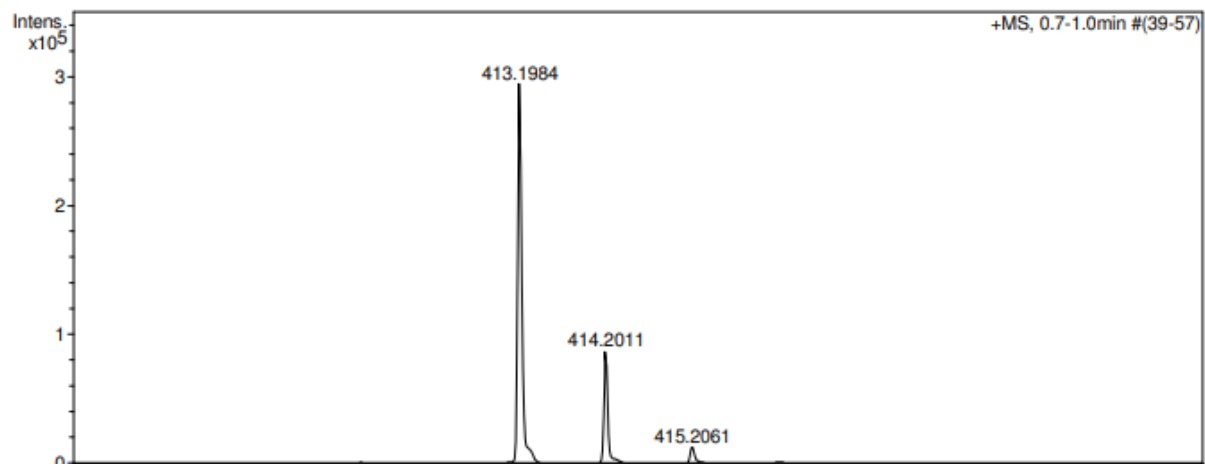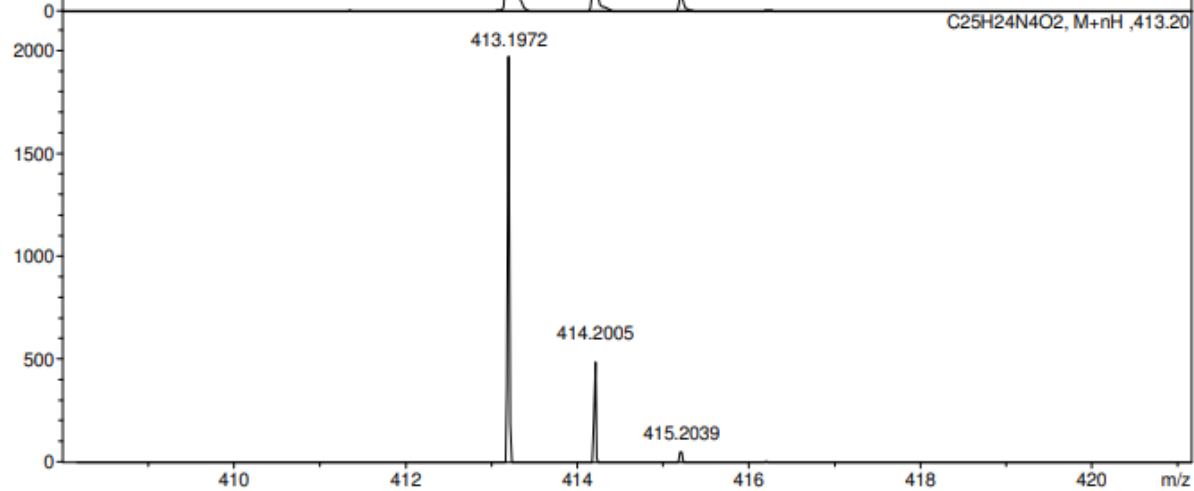

# HRMS for compound **13a**

## Acquisition Parameter

|             |            |                      |          |                  |           |
|-------------|------------|----------------------|----------|------------------|-----------|
| Source Type | ESI        | Ion Polarity         | Positive | Set Nebulizer    | 0.4 Bar   |
| Focus       | Not active |                      |          | Set Dry Heater   | 180 °C    |
| Scan Begin  | 50 m/z     | Set Capillary        | 4500 V   | Set Dry Gas      | 4.0 l/min |
| Scan End    | 3000 m/z   | Set End Plate Offset | -500 V   | Set Divert Valve | Waste     |

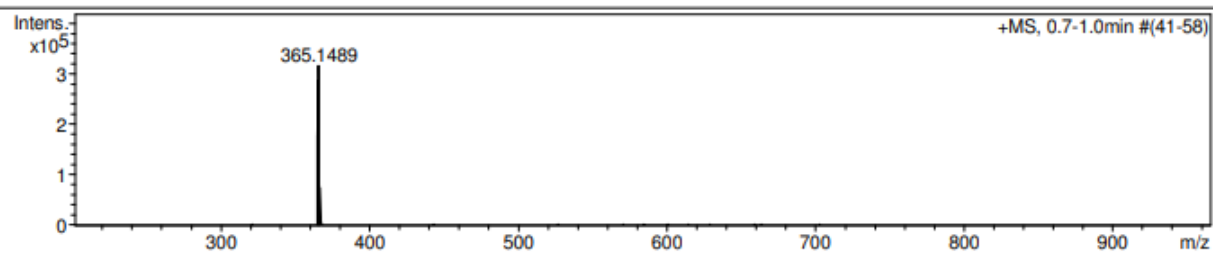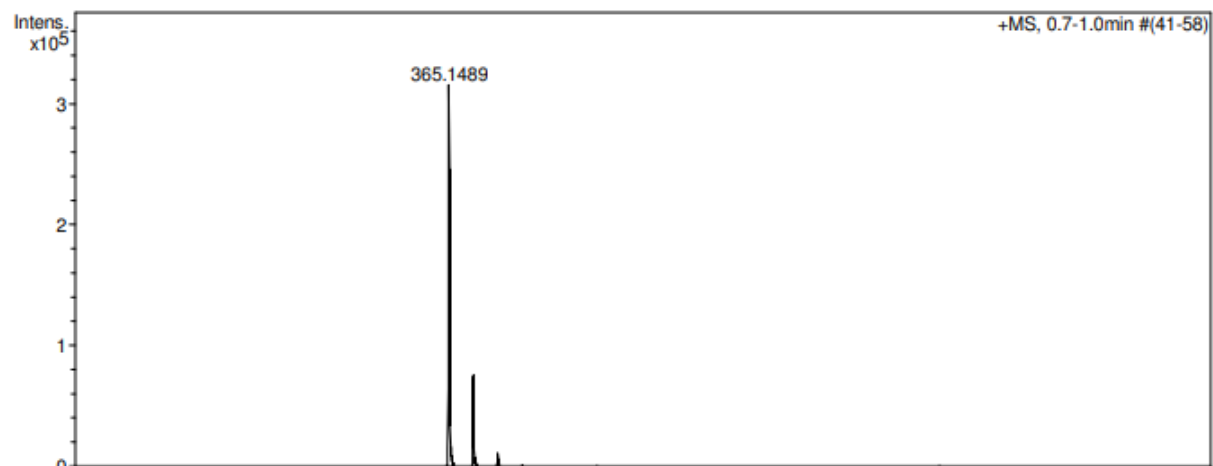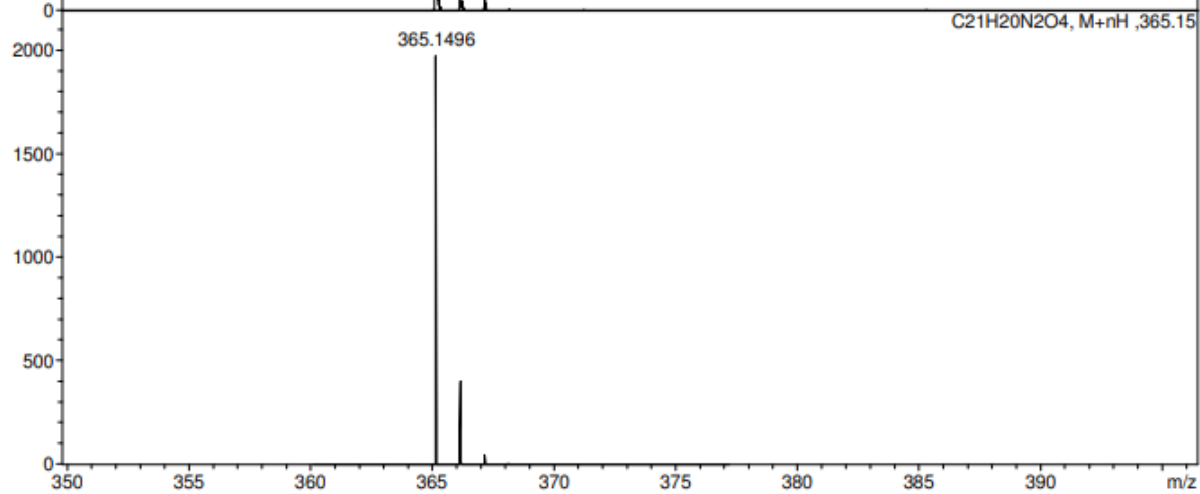

# HRMS for compound 13b

## Acquisition Parameter

|             |            |                      |          |                  |           |
|-------------|------------|----------------------|----------|------------------|-----------|
| Source Type | ESI        | Ion Polarity         | Positive | Set Nebulizer    | 0.4 Bar   |
| Focus       | Not active |                      |          | Set Dry Heater   | 180 °C    |
| Scan Begin  | 50 m/z     | Set Capillary        | 4500 V   | Set Dry Gas      | 4.0 l/min |
| Scan End    | 3000 m/z   | Set End Plate Offset | -500 V   | Set Divert Valve | Waste     |

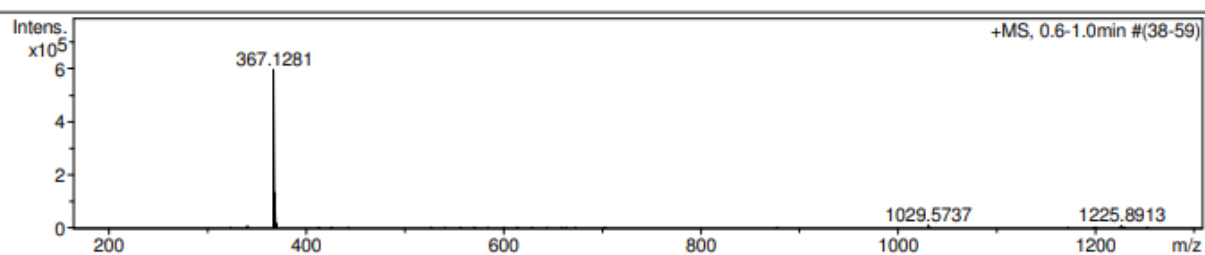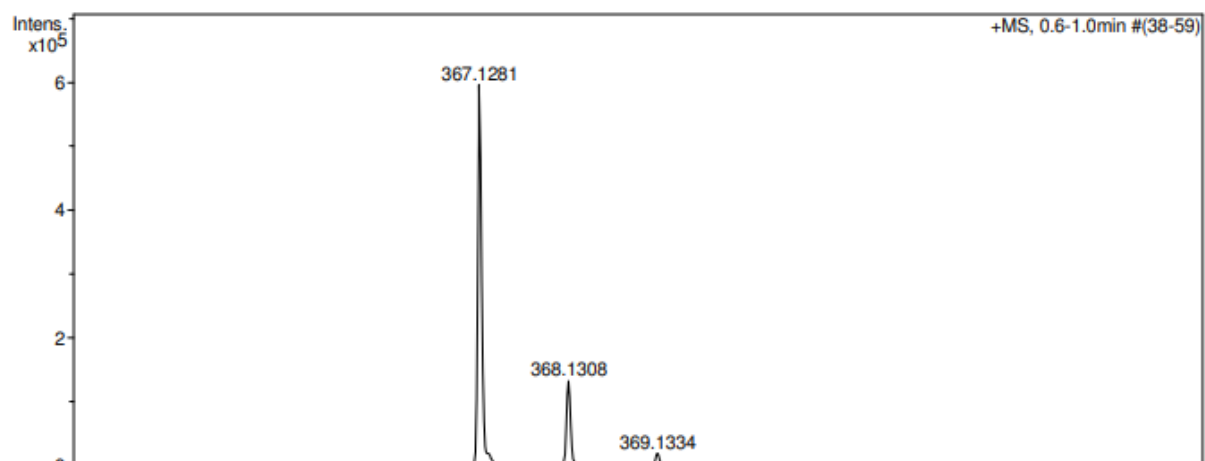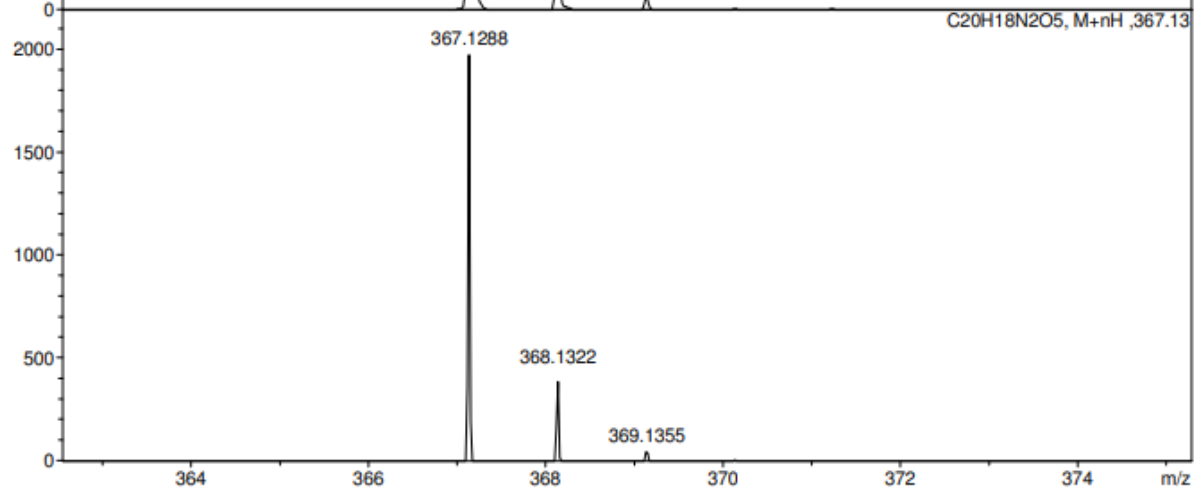

## 6. X-ray crystallographic data and refinement details

### 6.1. Compound **4b** (1)

X-ray diffraction data were collected at 100K on a four-circle Rigaku Synergy S diffractometer equipped with a HyPix600HE area-detector (kappa geometry, shutterless  $\omega$ -scan technique), using monochromatized Cu K $\alpha$ -radiation. The intensity data were integrated and corrected for absorption and decay by the CrysAlisPro program.<sup>1</sup> The structure was solved by direct methods using SHELXT<sup>2</sup> and refined on  $F^2$  using SHELXL-2018<sup>3</sup> in the OLEX2 program.<sup>4</sup> All non-hydrogen atoms were refined with individual anisotropic displacement parameters. Locations of hydroxy H-atoms (H1A, H1B, H2A and H2B) were found from the electron density-difference map; these hydrogen atoms were refined with individual isotropic displacement parameters. All other hydrogen atoms were placed in ideal calculated positions and refined as riding atoms with relative isotropic displacement parameters.

**Table S3.** Crystal data and structure refinement for **4b** (1).

|                                 |                                                                     |                  |
|---------------------------------|---------------------------------------------------------------------|------------------|
| Identification code             | <b>4b</b> (1)                                                       |                  |
| Empirical formula               | C <sub>21.50</sub> H <sub>25</sub> N <sub>2</sub> O <sub>3.50</sub> |                  |
| Formula weight                  | 367.43                                                              |                  |
| Temperature                     | 100.00(10) K                                                        |                  |
| Wavelength                      | 1.54184 Å                                                           |                  |
| Crystal system                  | Monoclinic                                                          |                  |
| Space group                     | P <sub>2</sub> /c                                                   |                  |
| Unit cell dimensions            | a = 22.38682(16) Å                                                  | a = 90°.         |
|                                 | b = 12.13681(9) Å                                                   | b = 93.0248(6)°. |
|                                 | c = 13.54889(7) Å                                                   | g = 90°.         |
| Volume                          | 3676.17(4) Å <sup>3</sup>                                           |                  |
| Z                               | 8                                                                   |                  |
| Density (calculated)            | 1.328 g/cm <sup>3</sup>                                             |                  |
| Absorption coefficient          | 0.731 mm <sup>-1</sup>                                              |                  |
| F(000)                          | 1568                                                                |                  |
| Crystal size                    | 0.21 x 0.13 x 0.08 mm <sup>3</sup>                                  |                  |
| Theta range for data collection | 3.266 to 78.500°.                                                   |                  |
| Index ranges                    | -28<=h<=28, -15<=k<=15, -12<=l<=16                                  |                  |
| Reflections collected           | 103526                                                              |                  |
| Independent reflections         | 7887 [R(int) = 0.0528]                                              |                  |
| Observed reflections            | 7522                                                                |                  |
| Completeness to theta = 67.684° | 99.9 %                                                              |                  |
| Absorption correction           | Semi-empirical from equivalents                                     |                  |
| Max. and min. transmission      | 1.00000 and 0.86655                                                 |                  |
| Refinement method               | Full-matrix least-squares on F <sup>2</sup>                         |                  |

|                                   |                                    |
|-----------------------------------|------------------------------------|
| Data / restraints / parameters    | 7887 / 0 / 504                     |
| Goodness-of-fit on F <sup>2</sup> | 1.187                              |
| Final R indices [I>2sigma(I)]     | R1 = 0.0718, wR2 = 0.2347          |
| R indices (all data)              | R1 = 0.0749, wR2 = 0.2380          |
| Largest diff. peak and hole       | 0.470 and -0.335 e.Å <sup>-3</sup> |
| CCDC                              | <b>2233462</b>                     |

**Table S4.** Atomic coordinates (x 10<sup>4</sup>) and equivalent isotropic displacement parameters (Å<sup>2</sup>x 10<sup>3</sup>) for **4b** (1). U(eq) is defined as one third of the trace of the orthogonalized U<sup>ij</sup> tensor.

|        | x       | y       | z       | U(eq) |
|--------|---------|---------|---------|-------|
| O(1A)  | 5160(1) | 7124(2) | 1535(2) | 21(1) |
| O(2A)  | 4054(1) | 7104(2) | 2010(2) | 22(1) |
| O(3A)  | 5755(1) | 9445(2) | 1908(2) | 28(1) |
| N(1A)  | 5339(1) | 7630(2) | 3157(2) | 17(1) |
| N(2A)  | 5432(1) | 7199(2) | 4760(2) | 18(1) |
| C(1A)  | 5058(1) | 7468(2) | 4017(2) | 17(1) |
| C(2A)  | 5997(1) | 7157(2) | 4366(2) | 18(1) |
| C(3A)  | 6552(1) | 6888(3) | 4822(2) | 23(1) |
| C(4A)  | 7043(1) | 6882(3) | 4245(3) | 26(1) |
| C(5A)  | 6983(2) | 7122(3) | 3230(3) | 28(1) |
| C(6A)  | 6439(1) | 7389(3) | 2763(2) | 25(1) |
| C(7A)  | 5947(1) | 7417(2) | 3358(2) | 19(1) |
| C(8A)  | 5045(1) | 7954(2) | 2223(2) | 17(1) |
| C(9A)  | 4349(1) | 8101(2) | 2274(2) | 18(1) |
| C(10A) | 4230(1) | 8979(2) | 1477(2) | 21(1) |
| C(11A) | 4729(1) | 9533(3) | 1275(2) | 22(1) |
| C(12A) | 5249(1) | 9083(2) | 1819(2) | 20(1) |
| C(13A) | 3627(2) | 9142(3) | 979(2)  | 28(1) |
| C(14A) | 4149(1) | 8445(2) | 3324(2) | 17(1) |
| C(15A) | 4398(1) | 7549(2) | 4033(2) | 18(1) |
| C(16A) | 3460(1) | 8464(3) | 3346(2) | 22(1) |
| C(17A) | 3241(1) | 8856(3) | 4345(2) | 26(1) |
| C(18A) | 3500(2) | 9981(3) | 4629(3) | 28(1) |
| C(19A) | 4184(1) | 9968(3) | 4628(2) | 24(1) |
| C(20A) | 4394(1) | 9590(2) | 3624(2) | 19(1) |

|        |          |          |         |       |
|--------|----------|----------|---------|-------|
| O(1B)  | 93(1)    | 7121(2)  | 8307(2) | 23(1) |
| O(2B)  | -1024(1) | 7126(2)  | 7644(2) | 23(1) |
| O(3B)  | 692(1)   | 9464(2)  | 7985(2) | 32(1) |
| N(1B)  | 271(1)   | 7622(2)  | 6713(2) | 18(1) |
| N(2B)  | 353(1)   | 7167(2)  | 5126(2) | 20(1) |
| C(1B)  | -15(1)   | 7451(2)  | 5807(2) | 18(1) |
| C(2B)  | 921(1)   | 7129(3)  | 5614(2) | 21(1) |
| C(3B)  | 1475(1)  | 6874(3)  | 5238(2) | 25(1) |
| C(4B)  | 1971(2)  | 6897(3)  | 5888(3) | 28(1) |
| C(5B)  | 1923(2)  | 7152(3)  | 6889(3) | 30(1) |
| C(6B)  | 1377(1)  | 7408(3)  | 7275(3) | 26(1) |
| C(7B)  | 880(1)   | 7402(2)  | 6608(2) | 20(1) |
| C(8B)  | -20(1)   | 7950(2)  | 7600(2) | 19(1) |
| C(9B)  | -717(1)  | 8116(2)  | 7431(2) | 20(1) |
| C(10B) | -824(1)  | 8990(3)  | 8214(2) | 23(1) |
| C(11B) | -322(2)  | 9533(3)  | 8507(2) | 24(1) |
| C(12B) | 193(1)   | 9083(3)  | 8030(2) | 23(1) |
| C(13B) | -1428(2) | 9178(3)  | 8611(3) | 30(1) |
| C(14B) | -911(1)  | 8474(2)  | 6350(2) | 19(1) |
| C(15B) | -674(1)  | 7561(3)  | 5680(2) | 20(1) |
| C(16B) | -650(1)  | 9606(3)  | 6102(2) | 21(1) |
| C(17B) | -842(1)  | 9989(3)  | 5056(2) | 25(1) |
| C(18B) | -1523(2) | 10040(3) | 4914(3) | 31(1) |
| C(19B) | -1803(1) | 8927(3)  | 5153(3) | 28(1) |
| C(20B) | -1600(1) | 8531(3)  | 6196(2) | 23(1) |
| O(4)   | 2675(2)  | 6127(3)  | 3815(2) | 65(1) |
| C(21)  | 2572(2)  | 5420(3)  | 3204(3) | 28(1) |
| C(22)  | 2127(2)  | 4538(4)  | 3385(4) | 44(1) |
| C(23)  | 2876(2)  | 5381(3)  | 2246(3) | 32(1) |

---

**Table S5.** Bond lengths [Å] and angles [°] for **4b** (1)

|               |          |               |          |
|---------------|----------|---------------|----------|
| O(1A)-H(1A)   | 0.84(5)  | C(16A)-C(17A) | 1.538(4) |
| O(1A)-C(8A)   | 1.405(3) | C(17A)-H(17A) | 0.9900   |
| O(2A)-H(2A)   | 0.85(5)  | C(17A)-H(17B) | 0.9900   |
| O(2A)-C(9A)   | 1.416(3) | C(17A)-C(18A) | 1.524(5) |
| O(3A)-C(12A)  | 1.214(4) | C(18A)-H(18A) | 0.9900   |
| N(1A)-C(1A)   | 1.367(4) | C(18A)-H(18B) | 0.9900   |
| N(1A)-C(7A)   | 1.398(4) | C(18A)-C(19A) | 1.532(4) |
| N(1A)-C(8A)   | 1.451(3) | C(19A)-H(19A) | 0.9900   |
| N(2A)-C(1A)   | 1.316(4) | C(19A)-H(19B) | 0.9900   |
| N(2A)-C(2A)   | 1.401(4) | C(19A)-C(20A) | 1.533(4) |
| C(1A)-C(15A)  | 1.483(4) | C(20A)-H(20A) | 0.9900   |
| C(2A)-C(3A)   | 1.396(4) | C(20A)-H(20B) | 0.9900   |
| C(2A)-C(7A)   | 1.400(4) | O(1B)-H(1B)   | 0.91(5)  |
| C(3A)-H(3A)   | 0.9500   | O(1B)-C(8B)   | 1.402(4) |
| C(3A)-C(4A)   | 1.383(5) | O(2B)-H(2B)   | 0.86(5)  |
| C(4A)-H(4A)   | 0.9500   | O(2B)-C(9B)   | 1.421(4) |
| C(4A)-C(5A)   | 1.405(5) | O(3B)-C(12B)  | 1.213(4) |
| C(5A)-H(5A)   | 0.9500   | N(1B)-C(1B)   | 1.370(4) |
| C(5A)-C(6A)   | 1.382(5) | N(1B)-C(7B)   | 1.402(4) |
| C(6A)-H(6A)   | 0.9500   | N(1B)-C(8B)   | 1.452(4) |
| C(6A)-C(7A)   | 1.399(4) | N(2B)-C(1B)   | 1.314(4) |
| C(8A)-C(9A)   | 1.574(4) | N(2B)-C(2B)   | 1.402(4) |
| C(8A)-C(12A)  | 1.553(4) | C(1B)-C(15B)  | 1.482(4) |
| C(9A)-C(10A)  | 1.530(4) | C(2B)-C(3B)   | 1.400(4) |
| C(9A)-C(14A)  | 1.571(4) | C(2B)-C(7B)   | 1.395(4) |
| C(10A)-C(11A) | 1.343(4) | C(3B)-H(3B)   | 0.9500   |
| C(10A)-C(13A) | 1.491(4) | C(3B)-C(4B)   | 1.381(5) |
| C(11A)-H(11A) | 0.9500   | C(4B)-H(4B)   | 0.9500   |
| C(11A)-C(12A) | 1.452(4) | C(4B)-C(5B)   | 1.400(5) |
| C(13A)-H(13A) | 0.9800   | C(5B)-H(5B)   | 0.9500   |
| C(13A)-H(13B) | 0.9800   | C(5B)-C(6B)   | 1.390(5) |
| C(13A)-H(13C) | 0.9800   | C(6B)-H(6B)   | 0.9500   |
| C(14A)-C(15A) | 1.536(4) | C(6B)-C(7B)   | 1.396(4) |
| C(14A)-C(16A) | 1.544(4) | C(8B)-C(9B)   | 1.579(4) |
| C(14A)-C(20A) | 1.541(4) | C(8B)-C(12B)  | 1.559(4) |
| C(15A)-H(15A) | 0.9900   | C(9B)-C(10B)  | 1.528(4) |
| C(15A)-H(15B) | 0.9900   | C(9B)-C(14B)  | 1.567(4) |
| C(16A)-H(16A) | 0.9900   | C(10B)-C(11B) | 1.345(5) |
| C(16A)-H(16B) | 0.9900   | C(10B)-C(13B) | 1.498(4) |

|                    |          |                      |          |
|--------------------|----------|----------------------|----------|
| C(11B)-H(11B)      | 0.9500   | N(2A)-C(1A)-N(1A)    | 112.6(3) |
| C(11B)-C(12B)      | 1.455(4) | N(2A)-C(1A)-C(15A)   | 126.8(3) |
| C(13B)-H(13D)      | 0.9800   | C(3A)-C(2A)-N(2A)    | 129.8(3) |
| C(13B)-H(13E)      | 0.9800   | C(3A)-C(2A)-C(7A)    | 120.5(3) |
| C(13B)-H(13F)      | 0.9800   | C(7A)-C(2A)-N(2A)    | 109.7(3) |
| C(14B)-C(15B)      | 1.544(4) | C(2A)-C(3A)-H(3A)    | 121.1    |
| C(14B)-C(16B)      | 1.538(4) | C(4A)-C(3A)-C(2A)    | 117.8(3) |
| C(14B)-C(20B)      | 1.547(4) | C(4A)-C(3A)-H(3A)    | 121.1    |
| C(15B)-H(15C)      | 0.9900   | C(3A)-C(4A)-H(4A)    | 119.5    |
| C(15B)-H(15D)      | 0.9900   | C(3A)-C(4A)-C(5A)    | 121.0(3) |
| C(16B)-H(16C)      | 0.9900   | C(5A)-C(4A)-H(4A)    | 119.5    |
| C(16B)-H(16D)      | 0.9900   | C(4A)-C(5A)-H(5A)    | 118.9    |
| C(16B)-C(17B)      | 1.531(4) | C(6A)-C(5A)-C(4A)    | 122.2(3) |
| C(17B)-H(17C)      | 0.9900   | C(6A)-C(5A)-H(5A)    | 118.9    |
| C(17B)-H(17D)      | 0.9900   | C(5A)-C(6A)-H(6A)    | 121.8    |
| C(17B)-C(18B)      | 1.529(4) | C(5A)-C(6A)-C(7A)    | 116.3(3) |
| C(18B)-H(18C)      | 0.9900   | C(7A)-C(6A)-H(6A)    | 121.8    |
| C(18B)-H(18D)      | 0.9900   | N(1A)-C(7A)-C(2A)    | 105.0(2) |
| C(18B)-C(19B)      | 1.530(5) | N(1A)-C(7A)-C(6A)    | 132.8(3) |
| C(19B)-H(19C)      | 0.9900   | C(6A)-C(7A)-C(2A)    | 122.2(3) |
| C(19B)-H(19D)      | 0.9900   | O(1A)-C(8A)-N(1A)    | 107.1(2) |
| C(19B)-C(20B)      | 1.538(5) | O(1A)-C(8A)-C(9A)    | 109.1(2) |
| C(20B)-H(20C)      | 0.9900   | O(1A)-C(8A)-C(12A)   | 109.4(2) |
| C(20B)-H(20D)      | 0.9900   | N(1A)-C(8A)-C(9A)    | 113.4(2) |
| O(4)-C(21)         | 1.206(5) | N(1A)-C(8A)-C(12A)   | 114.7(2) |
| C(21)-C(22)        | 1.490(5) | C(12A)-C(8A)-C(9A)   | 103.0(2) |
| C(21)-C(23)        | 1.498(5) | O(2A)-C(9A)-C(8A)    | 110.0(2) |
| C(22)-H(22A)       | 0.9800   | O(2A)-C(9A)-C(10A)   | 110.9(2) |
| C(22)-H(22B)       | 0.9800   | O(2A)-C(9A)-C(14A)   | 107.7(2) |
| C(22)-H(22C)       | 0.9800   | C(10A)-C(9A)-C(8A)   | 100.5(2) |
| C(23)-H(23A)       | 0.9800   | C(10A)-C(9A)-C(14A)  | 114.1(2) |
| C(23)-H(23B)       | 0.9800   | C(14A)-C(9A)-C(8A)   | 113.6(2) |
| C(23)-H(23C)       | 0.9800   | C(11A)-C(10A)-C(9A)  | 112.2(3) |
| C(8A)-O(1A)-H(1A)  | 109(3)   | C(11A)-C(10A)-C(13A) | 125.8(3) |
| C(9A)-O(2A)-H(2A)  | 107(3)   | C(13A)-C(10A)-C(9A)  | 122.0(3) |
| C(1A)-N(1A)-C(7A)  | 107.1(2) | C(10A)-C(11A)-H(11A) | 124.4    |
| C(1A)-N(1A)-C(8A)  | 125.1(2) | C(10A)-C(11A)-C(12A) | 111.2(3) |
| C(7A)-N(1A)-C(8A)  | 127.8(2) | C(12A)-C(11A)-H(11A) | 124.4    |
| C(1A)-N(2A)-C(2A)  | 105.6(2) | O(3A)-C(12A)-C(8A)   | 125.1(3) |
| N(1A)-C(1A)-C(15A) | 120.5(2) | O(3A)-C(12A)-C(11A)  | 129.3(3) |



|                      |          |                      |          |
|----------------------|----------|----------------------|----------|
| C(11A)-C(12A)-C(8A)  | 105.5(2) | H(19A)-C(19A)-H(19B) | 108.0    |
| C(10A)-C(13A)-H(13A) | 109.5    | C(20A)-C(19A)-H(19A) | 109.4    |
| C(10A)-C(13A)-H(13B) | 109.5    | C(20A)-C(19A)-H(19B) | 109.4    |
| C(10A)-C(13A)-H(13C) | 109.5    | C(14A)-C(20A)-H(20A) | 109.1    |
| H(13A)-C(13A)-H(13B) | 109.5    | C(14A)-C(20A)-H(20B) | 109.1    |
| H(13A)-C(13A)-H(13C) | 109.5    | C(19A)-C(20A)-C(14A) | 112.4(2) |
| H(13B)-C(13A)-H(13C) | 109.5    | C(19A)-C(20A)-H(20A) | 109.1    |
| C(15A)-C(14A)-C(9A)  | 105.5(2) | C(19A)-C(20A)-H(20B) | 109.1    |
| C(15A)-C(14A)-C(16A) | 109.1(2) | H(20A)-C(20A)-H(20B) | 107.9    |
| C(15A)-C(14A)-C(20A) | 111.2(2) | C(8B)-O(1B)-H(1B)    | 107(3)   |
| C(16A)-C(14A)-C(9A)  | 110.7(2) | C(9B)-O(2B)-H(2B)    | 108(3)   |
| C(20A)-C(14A)-C(9A)  | 111.3(2) | C(1B)-N(1B)-C(7B)    | 106.9(2) |
| C(20A)-C(14A)-C(16A) | 108.9(2) | C(1B)-N(1B)-C(8B)    | 125.0(2) |
| C(1A)-C(15A)-C(14A)  | 111.5(2) | C(7B)-N(1B)-C(8B)    | 128.1(2) |
| C(1A)-C(15A)-H(15A)  | 109.3    | C(1B)-N(2B)-C(2B)    | 105.3(2) |
| C(1A)-C(15A)-H(15B)  | 109.3    | N(1B)-C(1B)-C(15B)   | 120.4(3) |
| C(14A)-C(15A)-H(15A) | 109.3    | N(2B)-C(1B)-N(1B)    | 112.9(3) |
| C(14A)-C(15A)-H(15B) | 109.3    | N(2B)-C(1B)-C(15B)   | 126.7(3) |
| H(15A)-C(15A)-H(15B) | 108.0    | C(3B)-C(2B)-N(2B)    | 129.4(3) |
| C(14A)-C(16A)-H(16A) | 109.0    | C(7B)-C(2B)-N(2B)    | 110.0(3) |
| C(14A)-C(16A)-H(16B) | 109.0    | C(7B)-C(2B)-C(3B)    | 120.6(3) |
| H(16A)-C(16A)-H(16B) | 107.8    | C(2B)-C(3B)-H(3B)    | 121.3    |
| C(17A)-C(16A)-C(14A) | 112.7(2) | C(4B)-C(3B)-C(2B)    | 117.5(3) |
| C(17A)-C(16A)-H(16A) | 109.0    | C(4B)-C(3B)-H(3B)    | 121.3    |
| C(17A)-C(16A)-H(16B) | 109.0    | C(3B)-C(4B)-H(4B)    | 119.3    |
| C(16A)-C(17A)-H(17A) | 109.3    | C(3B)-C(4B)-C(5B)    | 121.4(3) |
| C(16A)-C(17A)-H(17B) | 109.3    | C(5B)-C(4B)-H(4B)    | 119.3    |
| H(17A)-C(17A)-H(17B) | 108.0    | C(4B)-C(5B)-H(5B)    | 119.1    |
| C(18A)-C(17A)-C(16A) | 111.4(3) | C(6B)-C(5B)-C(4B)    | 121.9(3) |
| C(18A)-C(17A)-H(17A) | 109.3    | C(6B)-C(5B)-H(5B)    | 119.1    |
| C(18A)-C(17A)-H(17B) | 109.3    | C(5B)-C(6B)-H(6B)    | 121.9    |
| C(17A)-C(18A)-H(18A) | 109.5    | C(5B)-C(6B)-C(7B)    | 116.3(3) |
| C(17A)-C(18A)-H(18B) | 109.5    | C(7B)-C(6B)-H(6B)    | 121.9    |
| C(17A)-C(18A)-C(19A) | 110.9(3) | C(2B)-C(7B)-N(1B)    | 104.9(3) |
| H(18A)-C(18A)-H(18B) | 108.0    | C(2B)-C(7B)-C(6B)    | 122.3(3) |
| C(19A)-C(18A)-H(18A) | 109.5    | C(6B)-C(7B)-N(1B)    | 132.7(3) |
| C(19A)-C(18A)-H(18B) | 109.5    | O(1B)-C(8B)-N(1B)    | 107.3(2) |
| C(18A)-C(19A)-H(19A) | 109.4    | O(1B)-C(8B)-C(9B)    | 109.4(2) |
| C(18A)-C(19A)-H(19B) | 109.4    | O(1B)-C(8B)-C(12B)   | 109.7(2) |
| C(18A)-C(19A)-C(20A) | 111.0(3) | N(1B)-C(8B)-C(9B)    | 113.5(2) |

|                      |          |                      |          |
|----------------------|----------|----------------------|----------|
| N(1B)-C(8B)-C(12B)   | 114.2(2) | C(17B)-C(16B)-H(16D) | 109.1    |
| C(12B)-C(8B)-C(9B)   | 102.8(2) | C(16B)-C(17B)-H(17C) | 109.4    |
| O(2B)-C(9B)-C(8B)    | 110.3(2) | C(16B)-C(17B)-H(17D) | 109.4    |
| O(2B)-C(9B)-C(10B)   | 110.5(2) | H(17C)-C(17B)-H(17D) | 108.0    |
| O(2B)-C(9B)-C(14B)   | 108.1(2) | C(18B)-C(17B)-C(16B) | 111.0(3) |
| C(10B)-C(9B)-C(8B)   | 100.3(2) | C(18B)-C(17B)-H(17C) | 109.4    |
| C(10B)-C(9B)-C(14B)  | 114.2(2) | C(18B)-C(17B)-H(17D) | 109.4    |
| C(14B)-C(9B)-C(8B)   | 113.2(2) | C(17B)-C(18B)-H(18C) | 109.5    |
| C(11B)-C(10B)-C(9B)  | 112.6(3) | C(17B)-C(18B)-H(18D) | 109.5    |
| C(11B)-C(10B)-C(13B) | 125.2(3) | C(17B)-C(18B)-C(19B) | 110.7(3) |
| C(13B)-C(10B)-C(9B)  | 122.2(3) | H(18C)-C(18B)-H(18D) | 108.1    |
| C(10B)-C(11B)-H(11B) | 124.6    | C(19B)-C(18B)-H(18C) | 109.5    |
| C(10B)-C(11B)-C(12B) | 110.8(3) | C(19B)-C(18B)-H(18D) | 109.5    |
| C(12B)-C(11B)-H(11B) | 124.6    | C(18B)-C(19B)-H(19C) | 109.3    |
| O(3B)-C(12B)-C(8B)   | 125.5(3) | C(18B)-C(19B)-H(19D) | 109.3    |
| O(3B)-C(12B)-C(11B)  | 129.1(3) | C(18B)-C(19B)-C(20B) | 111.5(3) |
| C(11B)-C(12B)-C(8B)  | 105.3(3) | H(19C)-C(19B)-H(19D) | 108.0    |
| C(10B)-C(13B)-H(13D) | 109.5    | C(20B)-C(19B)-H(19C) | 109.3    |
| C(10B)-C(13B)-H(13E) | 109.5    | C(20B)-C(19B)-H(19D) | 109.3    |
| C(10B)-C(13B)-H(13F) | 109.5    | C(14B)-C(20B)-H(20C) | 109.1    |
| H(13D)-C(13B)-H(13E) | 109.5    | C(14B)-C(20B)-H(20D) | 109.1    |
| H(13D)-C(13B)-H(13F) | 109.5    | C(19B)-C(20B)-C(14B) | 112.4(3) |
| H(13E)-C(13B)-H(13F) | 109.5    | C(19B)-C(20B)-H(20C) | 109.1    |
| C(15B)-C(14B)-C(9B)  | 105.3(2) | C(19B)-C(20B)-H(20D) | 109.1    |
| C(15B)-C(14B)-C(20B) | 108.9(2) | H(20C)-C(20B)-H(20D) | 107.8    |
| C(16B)-C(14B)-C(9B)  | 111.3(2) | O(4)-C(21)-C(22)     | 120.2(4) |
| C(16B)-C(14B)-C(15B) | 111.5(2) | O(4)-C(21)-C(23)     | 122.5(3) |
| C(16B)-C(14B)-C(20B) | 108.5(2) | C(22)-C(21)-C(23)    | 117.3(3) |
| C(20B)-C(14B)-C(9B)  | 111.3(2) | C(21)-C(22)-H(22A)   | 109.5    |
| C(1B)-C(15B)-C(14B)  | 111.5(2) | C(21)-C(22)-H(22B)   | 109.5    |
| C(1B)-C(15B)-H(15C)  | 109.3    | C(21)-C(22)-H(22C)   | 109.5    |
| C(1B)-C(15B)-H(15D)  | 109.3    | H(22A)-C(22)-H(22B)  | 109.5    |
| C(14B)-C(15B)-H(15C) | 109.3    | H(22A)-C(22)-H(22C)  | 109.5    |
| C(14B)-C(15B)-H(15D) | 109.3    | H(22B)-C(22)-H(22C)  | 109.5    |
| H(15C)-C(15B)-H(15D) | 108.0    | C(21)-C(23)-H(23A)   | 109.5    |
| C(14B)-C(16B)-H(16C) | 109.1    | C(21)-C(23)-H(23B)   | 109.5    |
| C(14B)-C(16B)-H(16D) | 109.1    | C(21)-C(23)-H(23C)   | 109.5    |
| H(16C)-C(16B)-H(16D) | 107.8    | H(23A)-C(23)-H(23B)  | 109.5    |
| C(17B)-C(16B)-C(14B) | 112.5(3) | H(23A)-C(23)-H(23C)  | 109.5    |
| C(17B)-C(16B)-H(16C) | 109.1    | H(23B)-C(23)-H(23C)  | 109.5    |

**Table S6.** Anisotropic displacement parameters ( $\text{\AA}^2 \times 10^3$ ) for **4b** (1). The anisotropic displacement factor exponent takes the form:  $-2p^2[h^2 a^*2U^{11} + \dots + 2 h k a^* b^* U^{12}]$

|        | $U^{11}$ | $U^{22}$ | $U^{33}$ | $U^{23}$ | $U^{13}$ | $U^{12}$ |
|--------|----------|----------|----------|----------|----------|----------|
| O(1A)  | 32(1)    | 20(1)    | 11(1)    | -1(1)    | 2(1)     | 4(1)     |
| O(2A)  | 26(1)    | 18(1)    | 21(1)    | -4(1)    | -1(1)    | -3(1)    |
| O(3A)  | 27(1)    | 28(1)    | 29(1)    | 4(1)     | 0(1)     | -6(1)    |
| N(1A)  | 19(1)    | 23(1)    | 9(1)     | 1(1)     | 0(1)     | 1(1)     |
| N(2A)  | 22(1)    | 21(1)    | 12(1)    | 0(1)     | 0(1)     | 0(1)     |
| C(1A)  | 22(1)    | 17(1)    | 12(1)    | 0(1)     | 2(1)     | 1(1)     |
| C(2A)  | 22(1)    | 17(1)    | 16(1)    | -2(1)    | 0(1)     | 0(1)     |
| C(3A)  | 27(2)    | 24(2)    | 19(1)    | -2(1)    | -2(1)    | 2(1)     |
| C(4A)  | 21(1)    | 28(2)    | 29(2)    | 1(1)     | -2(1)    | 1(1)     |
| C(5A)  | 22(2)    | 32(2)    | 30(2)    | 4(1)     | 8(1)     | 2(1)     |
| C(6A)  | 25(2)    | 31(2)    | 20(1)    | 4(1)     | 6(1)     | 1(1)     |
| C(7A)  | 19(1)    | 19(1)    | 19(1)    | 0(1)     | 2(1)     | 1(1)     |
| C(8A)  | 23(1)    | 18(1)    | 10(1)    | 0(1)     | 0(1)     | 0(1)     |
| C(9A)  | 21(1)    | 17(1)    | 15(1)    | -2(1)    | -1(1)    | -1(1)    |
| C(10A) | 27(2)    | 20(1)    | 15(1)    | -4(1)    | 0(1)     | 4(1)     |
| C(11A) | 30(2)    | 19(1)    | 16(1)    | 2(1)     | 1(1)     | 3(1)     |
| C(12A) | 27(2)    | 19(1)    | 14(1)    | -1(1)    | 3(1)     | -1(1)    |
| C(13A) | 30(2)    | 31(2)    | 24(2)    | 2(1)     | -6(1)    | 6(1)     |
| C(14A) | 19(1)    | 17(1)    | 16(1)    | -1(1)    | 0(1)     | -1(1)    |
| C(15A) | 20(1)    | 20(1)    | 14(1)    | 0(1)     | 2(1)     | -1(1)    |
| C(16A) | 20(1)    | 23(1)    | 23(2)    | 0(1)     | 0(1)     | -1(1)    |
| C(17A) | 23(1)    | 30(2)    | 27(2)    | 3(1)     | 7(1)     | 2(1)     |
| C(18A) | 31(2)    | 27(2)    | 27(2)    | -1(1)    | 9(1)     | 5(1)     |
| C(19A) | 29(2)    | 22(2)    | 20(1)    | -4(1)    | 4(1)     | -1(1)    |
| C(20A) | 23(1)    | 16(1)    | 16(1)    | -3(1)    | 1(1)     | -1(1)    |
| O(1B)  | 33(1)    | 23(1)    | 13(1)    | 2(1)     | -2(1)    | 4(1)     |
| O(2B)  | 25(1)    | 20(1)    | 24(1)    | 4(1)     | 4(1)     | -2(1)    |
| O(3B)  | 27(1)    | 29(1)    | 40(1)    | -6(1)    | 1(1)     | -5(1)    |
| N(1B)  | 19(1)    | 24(1)    | 12(1)    | -1(1)    | -1(1)    | 2(1)     |
| N(2B)  | 21(1)    | 25(1)    | 14(1)    | 0(1)     | 1(1)     | 1(1)     |
| C(1B)  | 21(1)    | 21(1)    | 14(1)    | 2(1)     | -1(1)    | 1(1)     |
| C(2B)  | 21(1)    | 22(1)    | 20(1)    | 4(1)     | 1(1)     | 2(1)     |
| C(3B)  | 26(2)    | 28(2)    | 22(2)    | 4(1)     | 6(1)     | 3(1)     |
| C(4B)  | 21(1)    | 28(2)    | 37(2)    | 5(1)     | 4(1)     | 3(1)     |
| C(5B)  | 20(2)    | 30(2)    | 38(2)    | 0(1)     | -5(1)    | 2(1)     |

|        |       |       |       |        |       |        |
|--------|-------|-------|-------|--------|-------|--------|
| C(6B)  | 25(2) | 28(2) | 26(2) | -1(1)  | -4(1) | 1(1)   |
| C(7B)  | 19(1) | 20(1) | 21(1) | 1(1)   | 0(1)  | 1(1)   |
| C(8B)  | 24(1) | 19(1) | 14(1) | 0(1)   | 2(1)  | 0(1)   |
| C(9B)  | 22(1) | 18(1) | 18(1) | 2(1)   | 3(1)  | -3(1)  |
| C(10B) | 29(2) | 22(1) | 18(1) | 2(1)   | 4(1)  | 3(1)   |
| C(11B) | 32(2) | 19(1) | 21(1) | -4(1)  | 2(1)  | 1(1)   |
| C(12B) | 26(2) | 23(2) | 21(1) | -2(1)  | -1(1) | -2(1)  |
| C(13B) | 30(2) | 32(2) | 29(2) | -4(1)  | 10(1) | 3(1)   |
| C(14B) | 18(1) | 21(1) | 18(1) | 2(1)   | 1(1)  | 0(1)   |
| C(15B) | 20(1) | 24(1) | 17(1) | -1(1)  | 0(1)  | -1(1)  |
| C(16B) | 21(1) | 21(1) | 23(2) | 3(1)   | 1(1)  | -1(1)  |
| C(17B) | 24(2) | 25(2) | 26(2) | 8(1)   | 1(1)  | 0(1)   |
| C(18B) | 27(2) | 32(2) | 34(2) | 10(1)  | -5(1) | 2(1)   |
| C(19B) | 20(1) | 30(2) | 32(2) | 3(1)   | -2(1) | 1(1)   |
| C(20B) | 20(1) | 22(1) | 28(2) | 1(1)   | 2(1)  | -1(1)  |
| O(4)   | 90(3) | 66(2) | 40(2) | -23(2) | 26(2) | -42(2) |
| C(21)  | 31(2) | 25(2) | 28(2) | 2(1)   | -1(1) | -3(1)  |
| C(22)  | 42(2) | 36(2) | 58(3) | -4(2)  | 14(2) | -11(2) |
| C(23)  | 32(2) | 32(2) | 32(2) | -3(1)  | 3(1)  | -3(1)  |

**Table S7.** Hydrogen coordinates ( $\times 10^4$ ) and isotropic displacement parameters ( $\text{\AA}^2 \times 10^{-3}$ ) for **4b** (1)

|        | x        | y        | z        | U(eq) |
|--------|----------|----------|----------|-------|
| H(1A)  | 5235(19) | 7410(40) | 990(40)  | 31    |
| H(2A)  | 4290(20) | 6720(40) | 1680(30) | 33    |
| H(3A)  | 6590     | 6714     | 5506     | 28    |
| H(4A)  | 7427     | 6714     | 4539     | 31    |
| H(5A)  | 7329     | 7099     | 2852     | 34    |
| H(6A)  | 6401     | 7545     | 2075     | 30    |
| H(11A) | 4739     | 10140    | 833      | 26    |
| H(13A) | 3670     | 9383     | 297      | 43    |
| H(13B) | 3408     | 9703     | 1335     | 43    |
| H(13C) | 3405     | 8445     | 979      | 43    |
| H(15A) | 4285     | 7721     | 4713     | 22    |
| H(15B) | 4217     | 6830     | 3842     | 22    |
| H(16A) | 3297     | 8959     | 2818     | 26    |
| H(16B) | 3303     | 7714     | 3207     | 26    |

|        |          |          |          |    |
|--------|----------|----------|----------|----|
| H(17A) | 2799     | 8900     | 4304     | 32 |
| H(17B) | 3361     | 8314     | 4863     | 32 |
| H(18A) | 3375     | 10185    | 5295     | 34 |
| H(18B) | 3340     | 10542    | 4155     | 34 |
| H(19A) | 4345     | 9464     | 5151     | 28 |
| H(19B) | 4340     | 10716    | 4776     | 28 |
| H(20A) | 4837     | 9568     | 3652     | 22 |
| H(20B) | 4262     | 10134    | 3112     | 22 |
| H(1B)  | 90(20)   | 7440(40) | 8910(40) | 35 |
| H(2B)  | -770(20) | 6680(40) | 7930(30) | 34 |
| H(3B)  | 1509     | 6693     | 4561     | 30 |
| H(4B)  | 2354     | 6737     | 5652     | 34 |
| H(5B)  | 2273     | 7149     | 7316     | 35 |
| H(6B)  | 1344     | 7578     | 7954     | 32 |
| H(11B) | -305     | 10128    | 8962     | 29 |
| H(13D) | -1380    | 9450     | 9291     | 45 |
| H(13E) | -1651    | 8483     | 8601     | 45 |
| H(13F) | -1648    | 9723     | 8200     | 45 |
| H(15C) | -863     | 6851     | 5841     | 24 |
| H(15D) | -786     | 7737     | 4981     | 24 |
| H(16C) | -782     | 10156    | 6584     | 26 |
| H(16D) | -208     | 9567     | 6166     | 26 |
| H(17C) | -672     | 10727    | 4937     | 30 |
| H(17D) | -683     | 9472     | 4568     | 30 |
| H(18C) | -1637    | 10244    | 4222     | 37 |
| H(18D) | -1679    | 10614    | 5352     | 37 |
| H(19C) | -1687    | 8374     | 4662     | 33 |
| H(19D) | -2244    | 8995     | 5106     | 33 |
| H(20C) | -1770    | 7792     | 6309     | 28 |
| H(20D) | -1758    | 9040     | 6691     | 28 |
| H(22A) | 2315     | 3815     | 3314     | 67 |
| H(22B) | 1787     | 4607     | 2905     | 67 |
| H(22C) | 1988     | 4613     | 4056     | 67 |
| H(23A) | 2576     | 5432     | 1695     | 48 |
| H(23B) | 3096     | 4686     | 2202     | 48 |
| H(23C) | 3156     | 6000     | 2216     | 48 |

---

**Table S8.** Torsion angles [°] for **4b** (1)

|                           |           |                             |           |
|---------------------------|-----------|-----------------------------|-----------|
| O(1A)-C(8A)-C(9A)-O(2A)   | 26.8(3)   | C(7A)-N(1A)-C(8A)-O(1A)     | 58.6(4)   |
| O(1A)-C(8A)-C(9A)-C(10A)  | -90.2(3)  | C(7A)-N(1A)-C(8A)-C(9A)     | 179.0(3)  |
| O(1A)-C(8A)-C(9A)-C(14A)  | 147.6(2)  | C(7A)-N(1A)-C(8A)-C(12A)    | -63.0(4)  |
| O(1A)-C(8A)-C(12A)-O(3A)  | -85.0(4)  | C(7A)-C(2A)-C(3A)-C(4A)     | -0.3(5)   |
| O(1A)-C(8A)-C(12A)-C(11A) | 90.8(3)   | C(8A)-N(1A)-C(1A)-N(2A)     | -178.7(3) |
| O(2A)-C(9A)-C(10A)-C(11A) | -136.1(3) | C(8A)-N(1A)-C(1A)-C(15A)    | 4.1(4)    |
| O(2A)-C(9A)-C(10A)-C(13A) | 41.9(4)   | C(8A)-N(1A)-C(7A)-C(2A)     | 179.1(3)  |
| O(2A)-C(9A)-C(14A)-C(15A) | 65.5(3)   | C(8A)-N(1A)-C(7A)-C(6A)     | -3.7(5)   |
| O(2A)-C(9A)-C(14A)-C(16A) | -52.4(3)  | C(8A)-C(9A)-C(10A)-C(11A)   | -19.8(3)  |
| O(2A)-C(9A)-C(14A)-C(20A) | -173.7(2) | C(8A)-C(9A)-C(10A)-C(13A)   | 158.2(3)  |
| N(1A)-C(1A)-C(15A)-C(14A) | -35.5(4)  | C(8A)-C(9A)-C(14A)-C(15A)   | -56.6(3)  |
| N(1A)-C(8A)-C(9A)-O(2A)   | -92.5(3)  | C(8A)-C(9A)-C(14A)-C(16A)   | -174.5(2) |
| N(1A)-C(8A)-C(9A)-C(10A)  | 150.6(2)  | C(8A)-C(9A)-C(14A)-C(20A)   | 64.2(3)   |
| N(1A)-C(8A)-C(9A)-C(14A)  | 28.4(3)   | C(9A)-C(8A)-C(12A)-O(3A)    | 159.1(3)  |
| N(1A)-C(8A)-C(12A)-O(3A)  | 35.4(4)   | C(9A)-C(8A)-C(12A)-C(11A)   | -25.1(3)  |
| N(1A)-C(8A)-C(12A)-C(11A) | -148.8(2) | C(9A)-C(10A)-C(11A)-C(12A)  | 4.3(4)    |
| N(2A)-C(1A)-C(15A)-C(14A) | 147.7(3)  | C(9A)-C(14A)-C(15A)-C(1A)   | 59.1(3)   |
| N(2A)-C(2A)-C(3A)-C(4A)   | 178.2(3)  | C(9A)-C(14A)-C(16A)-C(17A)  | -177.0(2) |
| N(2A)-C(2A)-C(7A)-N(1A)   | 0.7(3)    | C(9A)-C(14A)-C(20A)-C(19A)  | 177.6(2)  |
| N(2A)-C(2A)-C(7A)-C(6A)   | -176.9(3) | C(10A)-C(9A)-C(14A)-C(15A)  | -170.9(2) |
| C(1A)-N(1A)-C(7A)-C(2A)   | -1.4(3)   | C(10A)-C(9A)-C(14A)-C(16A)  | 71.1(3)   |
| C(1A)-N(1A)-C(7A)-C(6A)   | 175.9(3)  | C(10A)-C(9A)-C(14A)-C(20A)  | -50.2(3)  |
| C(1A)-N(1A)-C(8A)-O(1A)   | -120.9(3) | C(10A)-C(11A)-C(12A)-O(3A)  | -170.7(3) |
| C(1A)-N(1A)-C(8A)-C(9A)   | -0.5(4)   | C(10A)-C(11A)-C(12A)-C(8A)  | 13.7(3)   |
| C(1A)-N(1A)-C(8A)-C(12A)  | 117.5(3)  | C(12A)-C(8A)-C(9A)-O(2A)    | 142.9(2)  |
| C(1A)-N(2A)-C(2A)-C(3A)   | -178.4(3) | C(12A)-C(8A)-C(9A)-C(10A)   | 26.0(3)   |
| C(1A)-N(2A)-C(2A)-C(7A)   | 0.3(3)    | C(12A)-C(8A)-C(9A)-C(14A)   | -96.2(3)  |
| C(2A)-N(2A)-C(1A)-N(1A)   | -1.2(3)   | C(13A)-C(10A)-C(11A)-C(12A) | -173.6(3) |
| C(2A)-N(2A)-C(1A)-C(15A)  | 175.8(3)  | C(14A)-C(9A)-C(10A)-C(11A)  | 102.1(3)  |
| C(2A)-C(3A)-C(4A)-C(5A)   | -1.0(5)   | C(14A)-C(9A)-C(10A)-C(13A)  | -79.9(3)  |
| C(3A)-C(2A)-C(7A)-N(1A)   | 179.5(3)  | C(14A)-C(16A)-C(17A)-C(18A) | 55.3(3)   |
| C(3A)-C(2A)-C(7A)-C(6A)   | 1.9(5)    | C(15A)-C(14A)-C(16A)-C(17A) | 67.3(3)   |
| C(3A)-C(4A)-C(5A)-C(6A)   | 1.0(5)    | C(15A)-C(14A)-C(20A)-C(19A) | -65.1(3)  |
| C(4A)-C(5A)-C(6A)-C(7A)   | 0.5(5)    | C(16A)-C(14A)-C(15A)-C(1A)  | 178.1(2)  |
| C(5A)-C(6A)-C(7A)-N(1A)   | -178.8(3) | C(16A)-C(14A)-C(20A)-C(19A) | 55.2(3)   |
| C(5A)-C(6A)-C(7A)-C(2A)   | -1.9(5)   | C(16A)-C(17A)-C(18A)-C(19A) | -55.0(4)  |
| C(7A)-N(1A)-C(1A)-N(2A)   | 1.7(3)    | C(17A)-C(18A)-C(19A)-C(20A) | 55.8(4)   |
| C(7A)-N(1A)-C(1A)-C(15A)  | -175.5(3) | C(18A)-C(19A)-C(20A)-C(14A) | -57.0(3)  |

|                             |           |                             |           |
|-----------------------------|-----------|-----------------------------|-----------|
| C(20A)-C(14A)-C(15A)-C(1A)  | -61.7(3)  | C(7B)-N(1B)-C(8B)-O(1B)     | -58.7(4)  |
| C(20A)-C(14A)-C(16A)-C(17A) | -54.2(3)  | C(7B)-N(1B)-C(8B)-C(9B)     | -179.6(3) |
| O(1B)-C(8B)-C(9B)-O(2B)     | -27.0(3)  | C(7B)-N(1B)-C(8B)-C(12B)    | 63.1(4)   |
| O(1B)-C(8B)-C(9B)-C(10B)    | 89.6(3)   | C(7B)-C(2B)-C(3B)-C(4B)     | 0.5(5)    |
| O(1B)-C(8B)-C(9B)-C(14B)    | -148.3(2) | C(8B)-N(1B)-C(1B)-N(2B)     | 179.6(3)  |
| O(1B)-C(8B)-C(12B)-O(3B)    | 88.4(4)   | C(8B)-N(1B)-C(1B)-C(15B)    | -2.1(4)   |
| O(1B)-C(8B)-C(12B)-C(11B)   | -89.7(3)  | C(8B)-N(1B)-C(7B)-C(2B)     | -179.8(3) |
| O(2B)-C(9B)-C(10B)-C(11B)   | 136.3(3)  | C(8B)-N(1B)-C(7B)-C(6B)     | 0.9(6)    |
| O(2B)-C(9B)-C(10B)-C(13B)   | -42.3(4)  | C(8B)-C(9B)-C(10B)-C(11B)   | 19.8(3)   |
| O(2B)-C(9B)-C(14B)-C(15B)   | -65.2(3)  | C(8B)-C(9B)-C(10B)-C(13B)   | -158.7(3) |
| O(2B)-C(9B)-C(14B)-C(16B)   | 173.9(2)  | C(8B)-C(9B)-C(14B)-C(15B)   | 57.3(3)   |
| O(2B)-C(9B)-C(14B)-C(20B)   | 52.7(3)   | C(8B)-C(9B)-C(14B)-C(16B)   | -63.6(3)  |
| N(1B)-C(1B)-C(15B)-C(14B)   | 34.4(4)   | C(8B)-C(9B)-C(14B)-C(20B)   | 175.2(2)  |
| N(1B)-C(8B)-C(9B)-O(2B)     | 92.7(3)   | C(9B)-C(8B)-C(12B)-O(3B)    | -155.3(3) |
| N(1B)-C(8B)-C(9B)-C(10B)    | -150.7(2) | C(9B)-C(8B)-C(12B)-C(11B)   | 26.6(3)   |
| N(1B)-C(8B)-C(9B)-C(14B)    | -28.6(3)  | C(9B)-C(10B)-C(11B)-C(12B)  | -3.3(4)   |
| N(1B)-C(8B)-C(12B)-O(3B)    | -32.0(4)  | C(9B)-C(14B)-C(15B)-C(1B)   | -59.5(3)  |
| N(1B)-C(8B)-C(12B)-C(11B)   | 149.9(3)  | C(9B)-C(14B)-C(16B)-C(17B)  | -178.9(2) |
| N(2B)-C(1B)-C(15B)-C(14B)   | -147.6(3) | C(9B)-C(14B)-C(20B)-C(19B)  | 177.6(3)  |
| N(2B)-C(2B)-C(3B)-C(4B)     | -179.9(3) | C(10B)-C(9B)-C(14B)-C(15B)  | 171.3(2)  |
| N(2B)-C(2B)-C(7B)-N(1B)     | -0.7(3)   | C(10B)-C(9B)-C(14B)-C(16B)  | 50.4(3)   |
| N(2B)-C(2B)-C(7B)-C(6B)     | 178.7(3)  | C(10B)-C(9B)-C(14B)-C(20B)  | -70.8(3)  |
| C(1B)-N(1B)-C(7B)-C(2B)     | 1.2(3)    | C(10B)-C(11B)-C(12B)-O(3B)  | 166.7(3)  |
| C(1B)-N(1B)-C(7B)-C(6B)     | -178.0(3) | C(10B)-C(11B)-C(12B)-C(8B)  | -15.3(4)  |
| C(1B)-N(1B)-C(8B)-O(1B)     | 120.1(3)  | C(12B)-C(8B)-C(9B)-O(2B)    | -143.5(2) |
| C(1B)-N(1B)-C(8B)-C(9B)     | -0.8(4)   | C(12B)-C(8B)-C(9B)-C(10B)   | -26.9(3)  |
| C(1B)-N(1B)-C(8B)-C(12B)    | -118.1(3) | C(12B)-C(8B)-C(9B)-C(14B)   | 95.3(3)   |
| C(1B)-N(2B)-C(2B)-C(3B)     | -179.7(3) | C(13B)-C(10B)-C(11B)-C(12B) | 175.2(3)  |
| C(1B)-N(2B)-C(2B)-C(7B)     | -0.1(3)   | C(14B)-C(9B)-C(10B)-C(11B)  | -101.6(3) |
| C(2B)-N(2B)-C(1B)-N(1B)     | 0.9(3)    | C(14B)-C(9B)-C(10B)-C(13B)  | 79.9(4)   |
| C(2B)-N(2B)-C(1B)-C(15B)    | -177.3(3) | C(14B)-C(16B)-C(17B)-C(18B) | 57.7(4)   |
| C(2B)-C(3B)-C(4B)-C(5B)     | 0.8(5)    | C(15B)-C(14B)-C(16B)-C(17B) | 63.9(3)   |
| C(3B)-C(2B)-C(7B)-N(1B)     | 178.9(3)  | C(15B)-C(14B)-C(20B)-C(19B) | -66.7(3)  |
| C(3B)-C(2B)-C(7B)-C(6B)     | -1.7(5)   | C(16B)-C(14B)-C(15B)-C(1B)  | 61.3(3)   |
| C(3B)-C(4B)-C(5B)-C(6B)     | -0.9(5)   | C(16B)-C(14B)-C(20B)-C(19B) | 54.8(3)   |
| C(4B)-C(5B)-C(6B)-C(7B)     | -0.2(5)   | C(16B)-C(17B)-C(18B)-C(19B) | -55.7(4)  |
| C(5B)-C(6B)-C(7B)-N(1B)     | -179.3(3) | C(17B)-C(18B)-C(19B)-C(20B) | 54.8(4)   |
| C(5B)-C(6B)-C(7B)-C(2B)     | 1.5(5)    | C(18B)-C(19B)-C(20B)-C(14B) | -55.5(4)  |
| C(7B)-N(1B)-C(1B)-N(2B)     | -1.4(4)   | C(20B)-C(14B)-C(15B)-C(1B)  | -179.0(2) |
| C(7B)-N(1B)-C(1B)-C(15B)    | 176.9(3)  | C(20B)-C(14B)-C(16B)-C(17B) | -56.0(3)  |

**Table S9.** Hydrogen bonds for **4b** (1) [ $\text{\AA}$  and  $^\circ$ ].

| D-H...A               | d(D-H)  | d(H...A) | d(D...A) | $\angle(\text{DHA})$ |
|-----------------------|---------|----------|----------|----------------------|
| O(1A)-H(1A)...N(2A)#1 | 0.84(5) | 1.81(5)  | 2.643(3) | 170(4)               |
| O(2A)-H(2A)...O(1A)   | 0.85(5) | 2.02(4)  | 2.591(3) | 124(4)               |
| O(1B)-H(1B)...N(2B)#2 | 0.91(5) | 1.79(5)  | 2.648(3) | 158(4)               |
| O(2B)-H(2B)...O(1B)   | 0.86(5) | 2.05(4)  | 2.612(3) | 122(4)               |

Symmetry transformations used to generate equivalent atoms:

#1  $x, -y+3/2, z-1/2$  #2  $x, -y+3/2, z+1/2$

## 6.2. Compound **4b** (2)

X-ray diffraction data were collected at 100K on a four-circle Rigaku Synergy S diffractometer equipped with a HyPix600HE area-detector (kappa geometry, shutterless  $\omega$ -scan technique), using monochromatized Cu  $K_\alpha$  radiation. The intensity data were integrated and corrected for absorption and decay by the CrysAlisPro program.<sup>1</sup> The structure was solved by direct methods using SHELXT<sup>2</sup> and refined on  $F^2$  using SHELXL-2018<sup>3</sup> in the OLEX2 program.<sup>4</sup> All non-hydrogen atoms were refined with individual anisotropic displacement parameters. Locations of hydroxy H-atoms were found from the electron density-difference map; these hydrogen atoms were refined with individual isotropic displacement parameters. All other hydrogen atoms were placed in ideal calculated positions and refined as riding atoms with relative isotropic displacement parameters.

**Table S10.** Crystal data and structure refinement for **4b** (2).

|                      |                                                               |                            |
|----------------------|---------------------------------------------------------------|----------------------------|
| Identification code  | <b>4b</b> (2)                                                 |                            |
| Empirical formula    | C <sub>20</sub> H <sub>22</sub> N <sub>2</sub> O <sub>3</sub> |                            |
| Formula weight       | 338.39                                                        |                            |
| Temperature          | 100.0(1) K                                                    |                            |
| Wavelength           | 1.54184 $\text{\AA}$                                          |                            |
| Crystal system       | Monoclinic                                                    |                            |
| Space group          | P2 <sub>1</sub>                                               |                            |
| Unit cell dimensions | $a = 11.68226(12) \text{\AA}$                                 | $a = 90^\circ$ .           |
|                      | $b = 9.54123(6) \text{\AA}$                                   | $b = 110.8694(11)^\circ$ . |
|                      | $c = 15.99352(16) \text{\AA}$                                 | $g = 90^\circ$ .           |
| Volume               | 1665.73(3) $\text{\AA}^3$                                     |                            |
| Z                    | 4                                                             |                            |



|                                   |                                             |
|-----------------------------------|---------------------------------------------|
| Density (calculated)              | 1.349 g/cm <sup>3</sup>                     |
| Absorption coefficient            | 0.737 mm <sup>-1</sup>                      |
| F(000)                            | 720                                         |
| Crystal size                      | 0.33 x 0.24 x 0.07 mm <sup>3</sup>          |
| Theta range for data collection   | 2.957 to 79.481°.                           |
| Index ranges                      | -14<=h<=14, -11<=k<=9, -20<=l<=20           |
| Reflections collected             | 6684                                        |
| Independent reflections           | 6684 [R(int) = 0]                           |
| Observed reflections              | 6666                                        |
| Completeness to theta = 67.684°   | 99.9 %                                      |
| Absorption correction             | Semi-empirical from equivalents             |
| Max. and min. transmission        | 1.00000 and 0.41618                         |
| Refinement method                 | Full-matrix least-squares on F <sup>2</sup> |
| Data / restraints / parameters    | 6684 / 7 / 467                              |
| Goodness-of-fit on F <sup>2</sup> | 1.067                                       |
| Final R indices [I>2sigma(I)]     | R1 = 0.0548, wR2 = 0.1411                   |
| R indices (all data)              | R1 = 0.0548, wR2 = 0.1412                   |
| Absolute structure parameter      | 0.01(13)                                    |
| Extinction coefficient            | 0.0095(13)                                  |
| Largest diff. peak and hole       | 0.533 and -0.349 e.Å <sup>-3</sup>          |
| CCDC                              | <b>2233466</b>                              |

**Table S11.** Atomic coordinates (x 10<sup>4</sup>) and equivalent isotropic displacement parameters (Å<sup>2</sup>x 10<sup>3</sup>) for **4b** (2). U(eq) is defined as one third of the trace of the orthogonalized U<sup>ij</sup> tensor.

|       | x       | y       | z       | U(eq) |
|-------|---------|---------|---------|-------|
| O(1A) | 4324(2) | 5090(2) | 659(1)  | 14(1) |
| O(2A) | 6646(2) | 4987(2) | 1749(1) | 14(1) |
| O(3A) | 3820(2) | 7643(2) | -604(1) | 17(1) |
| N(1A) | 4352(2) | 7304(2) | 1286(1) | 13(1) |
| N(2A) | 4225(2) | 8663(3) | 2393(1) | 16(1) |
| C(1A) | 4957(2) | 7955(3) | 2083(2) | 13(1) |
| C(2A) | 3054(2) | 8435(3) | 1770(2) | 15(1) |
| C(3A) | 1915(2) | 8903(3) | 1773(2) | 20(1) |
| C(4A) | 876(2)  | 8454(4) | 1082(2) | 22(1) |
| C(5A) | 942(2)  | 7573(3) | 399(2)  | 18(1) |
| C(6A) | 2063(2) | 7119(3) | 377(2)  | 16(1) |

|        |         |         |         |       |
|--------|---------|---------|---------|-------|
| C(7A)  | 3104(2) | 7571(3) | 1072(2) | 13(1) |
| C(8A)  | 4898(2) | 6399(3) | 797(2)  | 12(1) |
| C(9A)  | 6340(2) | 6238(3) | 1245(2) | 12(1) |
| C(10A) | 6692(2) | 6153(3) | 403(2)  | 13(1) |
| C(11A) | 5792(2) | 6591(3) | -338(2) | 16(1) |
| C(12A) | 4714(2) | 6990(3) | -143(2) | 13(1) |
| C(13A) | 7906(2) | 5624(3) | 437(2)  | 19(1) |
| C(14A) | 6988(2) | 7464(3) | 1898(2) | 12(1) |
| C(15A) | 6288(2) | 7687(3) | 2542(2) | 14(1) |
| C(16A) | 8323(2) | 7040(3) | 2464(2) | 15(1) |
| C(17A) | 9017(2) | 8214(3) | 3097(2) | 18(1) |
| C(18A) | 9021(2) | 9567(3) | 2592(2) | 21(1) |
| C(19A) | 7715(2) | 9993(3) | 2015(2) | 19(1) |
| C(20A) | 7018(2) | 8824(3) | 1385(2) | 15(1) |
| O(1B)  | 4304(2) | 105(2)  | 3961(1) | 14(1) |
| O(2B)  | 6642(2) | -1(2)   | 4097(1) | 14(1) |
| O(3B)  | 3805(2) | 2707(2) | 4945(1) | 17(1) |
| N(1B)  | 4367(2) | 2313(2) | 3346(1) | 13(1) |
| N(2B)  | 4294(2) | 3697(3) | 2199(1) | 15(1) |
| C(1B)  | 4997(2) | 2965(3) | 2886(2) | 12(1) |
| C(2B)  | 3105(2) | 3492(3) | 2193(2) | 15(1) |
| C(3B)  | 1999(2) | 4032(3) | 1600(2) | 20(1) |
| C(4B)  | 936(2)  | 3639(3) | 1742(2) | 20(1) |
| C(5B)  | 964(2)  | 2735(3) | 2442(2) | 19(1) |
| C(6B)  | 2056(2) | 2202(3) | 3036(2) | 17(1) |
| C(7B)  | 3121(2) | 2620(3) | 2901(2) | 14(1) |
| C(8B)  | 4884(2) | 1413(3) | 4120(2) | 11(1) |
| C(9B)  | 6337(2) | 1246(3) | 4452(1) | 12(1) |
| C(10B) | 6652(2) | 1139(3) | 5466(2) | 14(1) |
| C(11B) | 5742(2) | 1581(3) | 5729(2) | 16(1) |
| C(12B) | 4689(2) | 2016(3) | 4960(2) | 14(1) |
| C(13B) | 7857(2) | 605(3)  | 6088(2) | 18(1) |
| C(14B) | 6988(2) | 2486(3) | 4161(2) | 12(1) |
| C(15B) | 6334(2) | 2703(3) | 3144(1) | 13(1) |
| C(16B) | 6957(2) | 3840(3) | 4680(2) | 13(1) |
| C(17B) | 7667(2) | 5032(3) | 4449(2) | 17(1) |
| C(18B) | 9002(2) | 4639(3) | 4621(2) | 19(1) |
| C(19B) | 9067(2) | 3289(3) | 4118(2) | 18(1) |
| C(20B) | 8340(2) | 2100(3) | 4338(2) | 15(1) |

**Table S12.** Bond lengths [Å] and angles [°] for **4b** (2).

|               |          |               |          |
|---------------|----------|---------------|----------|
| O(1A)-H(1A)   | 0.88(3)  | C(16A)-H(16B) | 0.9900   |
| O(1A)-C(8A)   | 1.397(3) | C(16A)-C(17A) | 1.534(4) |
| O(2A)-H(2A)   | 0.88(3)  | C(17A)-H(17A) | 0.9900   |
| O(2A)-C(9A)   | 1.413(3) | C(17A)-H(17B) | 0.9900   |
| O(3A)-C(12A)  | 1.214(3) | C(17A)-C(18A) | 1.524(4) |
| N(1A)-C(1A)   | 1.367(3) | C(18A)-H(18A) | 0.9900   |
| N(1A)-C(7A)   | 1.398(3) | C(18A)-H(18B) | 0.9900   |
| N(1A)-C(8A)   | 1.456(3) | C(18A)-C(19A) | 1.530(4) |
| N(2A)-C(1A)   | 1.317(3) | C(19A)-H(19A) | 0.9900   |
| N(2A)-C(2A)   | 1.393(3) | C(19A)-H(19B) | 0.9900   |
| C(1A)-C(15A)  | 1.487(3) | C(19A)-C(20A) | 1.528(4) |
| C(2A)-C(3A)   | 1.406(3) | C(20A)-H(20A) | 0.9900   |
| C(2A)-C(7A)   | 1.404(3) | C(20A)-H(20B) | 0.9900   |
| C(3A)-H(3A)   | 0.9500   | O(1B)-H(1B)   | 0.89(3)  |
| C(3A)-C(4A)   | 1.388(4) | O(1B)-C(8B)   | 1.399(3) |
| C(4A)-H(4A)   | 0.9500   | O(2B)-H(2B)   | 0.88(3)  |
| C(4A)-C(5A)   | 1.401(4) | O(2B)-C(9B)   | 1.417(3) |
| C(5A)-H(5A)   | 0.9500   | O(3B)-C(12B)  | 1.219(3) |
| C(5A)-C(6A)   | 1.391(3) | N(1B)-C(1B)   | 1.362(3) |
| C(6A)-H(6A)   | 0.9500   | N(1B)-C(7B)   | 1.404(3) |
| C(6A)-C(7A)   | 1.392(3) | N(1B)-C(8B)   | 1.449(3) |
| C(8A)-C(9A)   | 1.585(3) | N(2B)-C(1B)   | 1.314(3) |
| C(8A)-C(12A)  | 1.547(3) | N(2B)-C(2B)   | 1.399(3) |
| C(9A)-C(10A)  | 1.542(3) | C(1B)-C(15B)  | 1.488(3) |
| C(9A)-C(14A)  | 1.572(3) | C(2B)-C(3B)   | 1.401(3) |
| C(10A)-C(11A) | 1.341(3) | C(2B)-C(7B)   | 1.401(4) |
| C(10A)-C(13A) | 1.489(3) | C(3B)-H(3B)   | 0.9500   |
| C(11A)-H(11A) | 0.9500   | C(3B)-C(4B)   | 1.391(4) |
| C(11A)-C(12A) | 1.452(3) | C(4B)-H(4B)   | 0.9500   |
| C(13A)-H(13A) | 0.9800   | C(4B)-C(5B)   | 1.404(4) |
| C(13A)-H(13B) | 0.9800   | C(5B)-H(5B)   | 0.9500   |
| C(13A)-H(13C) | 0.9800   | C(5B)-C(6B)   | 1.388(4) |
| C(14A)-C(15A) | 1.541(3) | C(6B)-H(6B)   | 0.9500   |
| C(14A)-C(16A) | 1.552(3) | C(6B)-C(7B)   | 1.394(3) |
| C(14A)-C(20A) | 1.542(4) | C(8B)-C(9B)   | 1.596(3) |
| C(15A)-H(15A) | 0.9900   | C(8B)-C(12B)  | 1.552(3) |
| C(15A)-H(15B) | 0.9900   | C(9B)-C(10B)  | 1.533(3) |
| C(16A)-H(16A) | 0.9900   | C(9B)-C(14B)  | 1.564(3) |

|                    |            |                      |            |
|--------------------|------------|----------------------|------------|
| C(10B)-C(11B)      | 1.342(3)   | C(4A)-C(3A)-H(3A)    | 121.3      |
| C(10B)-C(13B)      | 1.495(3)   | C(3A)-C(4A)-H(4A)    | 119.0      |
| C(11B)-H(11B)      | 0.9500     | C(3A)-C(4A)-C(5A)    | 122.1(2)   |
| C(11B)-C(12B)      | 1.456(3)   | C(5A)-C(4A)-H(4A)    | 119.0      |
| C(13B)-H(13D)      | 0.9800     | C(4A)-C(5A)-H(5A)    | 119.4      |
| C(13B)-H(13E)      | 0.9800     | C(6A)-C(5A)-C(4A)    | 121.3(2)   |
| C(13B)-H(13F)      | 0.9800     | C(6A)-C(5A)-H(5A)    | 119.4      |
| C(14B)-C(15B)      | 1.544(3)   | C(5A)-C(6A)-H(6A)    | 121.8      |
| C(14B)-C(16B)      | 1.543(4)   | C(5A)-C(6A)-C(7A)    | 116.5(2)   |
| C(14B)-C(20B)      | 1.547(3)   | C(7A)-C(6A)-H(6A)    | 121.8      |
| C(15B)-H(15C)      | 0.9900     | N(1A)-C(7A)-C(2A)    | 104.3(2)   |
| C(15B)-H(15D)      | 0.9900     | C(6A)-C(7A)-N(1A)    | 132.7(2)   |
| C(16B)-H(16C)      | 0.9900     | C(6A)-C(7A)-C(2A)    | 123.0(2)   |
| C(16B)-H(16D)      | 0.9900     | O(1A)-C(8A)-N(1A)    | 109.75(19) |
| C(16B)-C(17B)      | 1.528(3)   | O(1A)-C(8A)-C(9A)    | 111.0(2)   |
| C(17B)-H(17C)      | 0.9900     | O(1A)-C(8A)-C(12A)   | 106.20(19) |
| C(17B)-H(17D)      | 0.9900     | N(1A)-C(8A)-C(9A)    | 114.41(19) |
| C(17B)-C(18B)      | 1.530(3)   | N(1A)-C(8A)-C(12A)   | 111.7(2)   |
| C(18B)-H(18C)      | 0.9900     | C(12A)-C(8A)-C(9A)   | 103.36(18) |
| C(18B)-H(18D)      | 0.9900     | O(2A)-C(9A)-C(8A)    | 110.6(2)   |
| C(18B)-C(19B)      | 1.534(4)   | O(2A)-C(9A)-C(10A)   | 111.2(2)   |
| C(19B)-H(19C)      | 0.9900     | O(2A)-C(9A)-C(14A)   | 106.55(18) |
| C(19B)-H(19D)      | 0.9900     | C(10A)-C(9A)-C(8A)   | 100.48(18) |
| C(19B)-C(20B)      | 1.531(4)   | C(10A)-C(9A)-C(14A)  | 113.83(19) |
| C(20B)-H(20C)      | 0.9900     | C(14A)-C(9A)-C(8A)   | 114.2(2)   |
| C(20B)-H(20D)      | 0.9900     | C(11A)-C(10A)-C(9A)  | 112.8(2)   |
| C(8A)-O(1A)-H(1A)  | 111(2)     | C(11A)-C(10A)-C(13A) | 125.0(2)   |
| C(9A)-O(2A)-H(2A)  | 110(2)     | C(13A)-C(10A)-C(9A)  | 122.2(2)   |
| C(1A)-N(1A)-C(7A)  | 107.04(19) | C(10A)-C(11A)-H(11A) | 124.5      |
| C(1A)-N(1A)-C(8A)  | 126.21(19) | C(10A)-C(11A)-C(12A) | 110.9(2)   |
| C(7A)-N(1A)-C(8A)  | 126.5(2)   | C(12A)-C(11A)-H(11A) | 124.5      |
| C(1A)-N(2A)-C(2A)  | 104.7(2)   | O(3A)-C(12A)-C(8A)   | 124.7(2)   |
| N(1A)-C(1A)-C(15A) | 119.0(2)   | O(3A)-C(12A)-C(11A)  | 128.9(2)   |
| N(2A)-C(1A)-N(1A)  | 113.2(2)   | C(11A)-C(12A)-C(8A)  | 106.4(2)   |
| N(2A)-C(1A)-C(15A) | 127.4(2)   | C(10A)-C(13A)-H(13A) | 109.5      |
| N(2A)-C(2A)-C(3A)  | 129.6(2)   | C(10A)-C(13A)-H(13B) | 109.5      |
| N(2A)-C(2A)-C(7A)  | 110.6(2)   | C(10A)-C(13A)-H(13C) | 109.5      |
| C(7A)-C(2A)-C(3A)  | 119.8(2)   | H(13A)-C(13A)-H(13B) | 109.5      |
| C(2A)-C(3A)-H(3A)  | 121.3      | H(13A)-C(13A)-H(13C) | 109.5      |
| C(4A)-C(3A)-C(2A)  | 117.3(2)   | H(13B)-C(13A)-H(13C) | 109.5      |

|                      |            |                      |            |
|----------------------|------------|----------------------|------------|
| C(15A)-C(14A)-C(9A)  | 107.64(19) | C(19A)-C(20A)-H(20B) | 109.3      |
| C(15A)-C(14A)-C(16A) | 107.93(18) | H(20A)-C(20A)-H(20B) | 107.9      |
| C(15A)-C(14A)-C(20A) | 110.9(2)   | C(8B)-O(1B)-H(1B)    | 107(3)     |
| C(16A)-C(14A)-C(9A)  | 109.9(2)   | C(9B)-O(2B)-H(2B)    | 114(2)     |
| C(20A)-C(14A)-C(9A)  | 111.70(18) | C(1B)-N(1B)-C(7B)    | 107.0(2)   |
| C(20A)-C(14A)-C(16A) | 108.7(2)   | C(1B)-N(1B)-C(8B)    | 126.2(2)   |
| C(1A)-C(15A)-C(14A)  | 113.85(18) | C(7B)-N(1B)-C(8B)    | 126.7(2)   |
| C(1A)-C(15A)-H(15A)  | 108.8      | C(1B)-N(2B)-C(2B)    | 104.7(2)   |
| C(1A)-C(15A)-H(15B)  | 108.8      | N(1B)-C(1B)-C(15B)   | 119.3(2)   |
| C(14A)-C(15A)-H(15A) | 108.8      | N(2B)-C(1B)-N(1B)    | 113.45(19) |
| C(14A)-C(15A)-H(15B) | 108.8      | N(2B)-C(1B)-C(15B)   | 127.1(2)   |
| H(15A)-C(15A)-H(15B) | 107.7      | N(2B)-C(2B)-C(3B)    | 128.8(2)   |
| C(14A)-C(16A)-H(16A) | 109.1      | N(2B)-C(2B)-C(7B)    | 110.5(2)   |
| C(14A)-C(16A)-H(16B) | 109.1      | C(7B)-C(2B)-C(3B)    | 120.7(2)   |
| H(16A)-C(16A)-H(16B) | 107.9      | C(2B)-C(3B)-H(3B)    | 121.6      |
| C(17A)-C(16A)-C(14A) | 112.3(2)   | C(4B)-C(3B)-C(2B)    | 116.9(2)   |
| C(17A)-C(16A)-H(16A) | 109.1      | C(4B)-C(3B)-H(3B)    | 121.6      |
| C(17A)-C(16A)-H(16B) | 109.1      | C(3B)-C(4B)-H(4B)    | 119.1      |
| C(16A)-C(17A)-H(17A) | 109.3      | C(3B)-C(4B)-C(5B)    | 121.8(2)   |
| C(16A)-C(17A)-H(17B) | 109.3      | C(5B)-C(4B)-H(4B)    | 119.1      |
| H(17A)-C(17A)-H(17B) | 107.9      | C(4B)-C(5B)-H(5B)    | 119.2      |
| C(18A)-C(17A)-C(16A) | 111.7(2)   | C(6B)-C(5B)-C(4B)    | 121.7(2)   |
| C(18A)-C(17A)-H(17A) | 109.3      | C(6B)-C(5B)-H(5B)    | 119.2      |
| C(18A)-C(17A)-H(17B) | 109.3      | C(5B)-C(6B)-H(6B)    | 121.8      |
| C(17A)-C(18A)-H(18A) | 109.5      | C(5B)-C(6B)-C(7B)    | 116.3(2)   |
| C(17A)-C(18A)-H(18B) | 109.5      | C(7B)-C(6B)-H(6B)    | 121.8      |
| C(17A)-C(18A)-C(19A) | 110.7(2)   | C(2B)-C(7B)-N(1B)    | 104.3(2)   |
| H(18A)-C(18A)-H(18B) | 108.1      | C(6B)-C(7B)-N(1B)    | 133.1(2)   |
| C(19A)-C(18A)-H(18A) | 109.5      | C(6B)-C(7B)-C(2B)    | 122.6(2)   |
| C(19A)-C(18A)-H(18B) | 109.5      | O(1B)-C(8B)-N(1B)    | 110.24(19) |
| C(18A)-C(19A)-H(19A) | 109.0      | O(1B)-C(8B)-C(9B)    | 111.1(2)   |
| C(18A)-C(19A)-H(19B) | 109.0      | O(1B)-C(8B)-C(12B)   | 106.06(18) |
| H(19A)-C(19A)-H(19B) | 107.8      | N(1B)-C(8B)-C(9B)    | 114.44(18) |
| C(20A)-C(19A)-C(18A) | 112.7(2)   | N(1B)-C(8B)-C(12B)   | 112.0(2)   |
| C(20A)-C(19A)-H(19A) | 109.0      | C(12B)-C(8B)-C(9B)   | 102.46(18) |
| C(20A)-C(19A)-H(19B) | 109.0      | O(2B)-C(9B)-C(8B)    | 109.84(19) |
| C(14A)-C(20A)-H(20A) | 109.3      | O(2B)-C(9B)-C(10B)   | 111.6(2)   |
| C(14A)-C(20A)-H(20B) | 109.3      | O(2B)-C(9B)-C(14B)   | 107.33(18) |
| C(19A)-C(20A)-C(14A) | 111.81(19) | C(10B)-C(9B)-C(8B)   | 100.63(17) |
| C(19A)-C(20A)-H(20A) | 109.3      | C(10B)-C(9B)-C(14B)  | 114.0(2)   |

|                      |            |                      |            |
|----------------------|------------|----------------------|------------|
| C(14B)-C(9B)-C(8B)   | 113.42(19) | C(14B)-C(16B)-H(16D) | 109.2      |
| C(11B)-C(10B)-C(9B)  | 113.1(2)   | H(16C)-C(16B)-H(16D) | 107.9      |
| C(11B)-C(10B)-C(13B) | 124.2(2)   | C(17B)-C(16B)-C(14B) | 111.99(19) |
| C(13B)-C(10B)-C(9B)  | 122.7(2)   | C(17B)-C(16B)-H(16C) | 109.2      |
| C(10B)-C(11B)-H(11B) | 124.7      | C(17B)-C(16B)-H(16D) | 109.2      |
| C(10B)-C(11B)-C(12B) | 110.5(2)   | C(16B)-C(17B)-H(17C) | 109.1      |
| C(12B)-C(11B)-H(11B) | 124.7      | C(16B)-C(17B)-H(17D) | 109.1      |
| O(3B)-C(12B)-C(8B)   | 124.7(2)   | C(16B)-C(17B)-C(18B) | 112.4(2)   |
| O(3B)-C(12B)-C(11B)  | 128.8(2)   | H(17C)-C(17B)-H(17D) | 107.9      |
| C(11B)-C(12B)-C(8B)  | 106.5(2)   | C(18B)-C(17B)-H(17C) | 109.1      |
| C(10B)-C(13B)-H(13D) | 109.5      | C(18B)-C(17B)-H(17D) | 109.1      |
| C(10B)-C(13B)-H(13E) | 109.5      | C(17B)-C(18B)-H(18C) | 109.6      |
| C(10B)-C(13B)-H(13F) | 109.5      | C(17B)-C(18B)-H(18D) | 109.6      |
| H(13D)-C(13B)-H(13E) | 109.5      | C(17B)-C(18B)-C(19B) | 110.4(2)   |
| H(13D)-C(13B)-H(13F) | 109.5      | H(18C)-C(18B)-H(18D) | 108.1      |
| H(13E)-C(13B)-H(13F) | 109.5      | C(19B)-C(18B)-H(18C) | 109.6      |
| C(15B)-C(14B)-C(9B)  | 107.71(19) | C(19B)-C(18B)-H(18D) | 109.6      |
| C(15B)-C(14B)-C(20B) | 108.35(17) | C(18B)-C(19B)-H(19C) | 109.3      |
| C(16B)-C(14B)-C(9B)  | 111.49(18) | C(18B)-C(19B)-H(19D) | 109.3      |
| C(16B)-C(14B)-C(15B) | 110.9(2)   | H(19C)-C(19B)-H(19D) | 108.0      |
| C(16B)-C(14B)-C(20B) | 108.6(2)   | C(20B)-C(19B)-C(18B) | 111.5(2)   |
| C(20B)-C(14B)-C(9B)  | 109.8(2)   | C(20B)-C(19B)-H(19C) | 109.3      |
| C(1B)-C(15B)-C(14B)  | 113.05(18) | C(20B)-C(19B)-H(19D) | 109.3      |
| C(1B)-C(15B)-H(15C)  | 109.0      | C(14B)-C(20B)-H(20C) | 108.9      |
| C(1B)-C(15B)-H(15D)  | 109.0      | C(14B)-C(20B)-H(20D) | 108.9      |
| C(14B)-C(15B)-H(15C) | 109.0      | C(19B)-C(20B)-C(14B) | 113.3(2)   |
| C(14B)-C(15B)-H(15D) | 109.0      | C(19B)-C(20B)-H(20C) | 108.9      |
| H(15C)-C(15B)-H(15D) | 107.8      | C(19B)-C(20B)-H(20D) | 108.9      |
| C(14B)-C(16B)-H(16C) | 109.2      | H(20C)-C(20B)-H(20D) | 107.7      |

**Table S13.** Anisotropic displacement parameters ( $\text{\AA}^2 \times 10^3$ ) for **4b** (2). The anisotropic displacement factor exponent takes the form:  $-2p^2[h^2 a^*2U^{11} + \dots + 2 h k a^* b^* U^{12}]$

|       | U <sup>11</sup> | U <sup>22</sup> | U <sup>33</sup> | U <sup>23</sup> | U <sup>13</sup> | U <sup>12</sup> |
|-------|-----------------|-----------------|-----------------|-----------------|-----------------|-----------------|
| O(1A) | 18(1)           | 11(1)           | 15(1)           | 0(1)            | 10(1)           | -2(1)           |
| O(2A) | 18(1)           | 10(1)           | 15(1)           | 1(1)            | 8(1)            | 2(1)            |
| O(3A) | 18(1)           | 15(1)           | 18(1)           | 4(1)            | 7(1)            | -1(1)           |

|        |       |       |       |       |       |       |
|--------|-------|-------|-------|-------|-------|-------|
| N(1A)  | 14(1) | 14(1) | 14(1) | 0(1)  | 10(1) | 2(1)  |
| N(2A)  | 16(1) | 17(1) | 18(1) | 0(1)  | 12(1) | 1(1)  |
| C(1A)  | 15(1) | 11(1) | 17(1) | -1(1) | 10(1) | 0(1)  |
| C(2A)  | 17(1) | 16(1) | 19(1) | 0(1)  | 13(1) | 2(1)  |
| C(3A)  | 18(1) | 24(2) | 24(1) | -4(1) | 15(1) | 2(1)  |
| C(4A)  | 15(1) | 28(2) | 28(1) | -2(1) | 13(1) | 1(1)  |
| C(5A)  | 12(1) | 22(2) | 23(1) | 2(1)  | 9(1)  | -1(1) |
| C(6A)  | 16(1) | 17(1) | 18(1) | 3(1)  | 9(1)  | 0(1)  |
| C(7A)  | 14(1) | 11(1) | 19(1) | 2(1)  | 11(1) | 0(1)  |
| C(8A)  | 16(1) | 10(1) | 14(1) | 0(1)  | 10(1) | 1(1)  |
| C(9A)  | 14(1) | 9(1)  | 15(1) | -1(1) | 9(1)  | 2(1)  |
| C(10A) | 18(1) | 9(1)  | 17(1) | -3(1) | 12(1) | -3(1) |
| C(11A) | 21(1) | 15(1) | 16(1) | 0(1)  | 12(1) | 0(1)  |
| C(12A) | 18(1) | 10(1) | 14(1) | -1(1) | 8(1)  | -3(1) |
| C(13A) | 18(1) | 22(1) | 21(1) | -4(1) | 12(1) | -1(1) |
| C(14A) | 12(1) | 9(1)  | 16(1) | -1(1) | 7(1)  | 1(1)  |
| C(15A) | 14(1) | 17(1) | 15(1) | -3(1) | 9(1)  | 1(1)  |
| C(16A) | 14(1) | 13(1) | 20(1) | -1(1) | 7(1)  | 3(1)  |
| C(17A) | 15(1) | 20(2) | 19(1) | -5(1) | 6(1)  | -1(1) |
| C(18A) | 21(1) | 18(2) | 27(1) | -6(1) | 14(1) | -6(1) |
| C(19A) | 25(1) | 10(1) | 24(1) | -1(1) | 11(1) | -2(1) |
| C(20A) | 20(1) | 12(1) | 17(1) | 1(1)  | 10(1) | 0(1)  |
| O(1B)  | 18(1) | 10(1) | 18(1) | -2(1) | 12(1) | -3(1) |
| O(2B)  | 17(1) | 9(1)  | 20(1) | 1(1)  | 13(1) | 2(1)  |
| O(3B)  | 18(1) | 15(1) | 24(1) | -5(1) | 14(1) | -1(1) |
| N(1B)  | 14(1) | 13(1) | 15(1) | 1(1)  | 9(1)  | -1(1) |
| N(2B)  | 15(1) | 16(1) | 16(1) | 1(1)  | 8(1)  | 1(1)  |
| C(1B)  | 12(1) | 10(1) | 16(1) | 1(1)  | 9(1)  | 0(1)  |
| C(2B)  | 16(1) | 13(1) | 18(1) | -1(1) | 9(1)  | 0(1)  |
| C(3B)  | 17(1) | 21(2) | 20(1) | 1(1)  | 6(1)  | 1(1)  |
| C(4B)  | 16(1) | 20(2) | 22(1) | -1(1) | 6(1)  | 2(1)  |
| C(5B)  | 16(1) | 16(1) | 28(1) | -6(1) | 12(1) | -2(1) |
| C(6B)  | 18(1) | 16(1) | 22(1) | -1(1) | 12(1) | -2(1) |
| C(7B)  | 13(1) | 12(1) | 18(1) | -2(1) | 7(1)  | -1(1) |
| C(8B)  | 15(1) | 8(1)  | 15(1) | 1(1)  | 11(1) | -1(1) |
| C(9B)  | 14(1) | 10(1) | 14(1) | 2(1)  | 8(1)  | 2(1)  |
| C(10B) | 19(1) | 10(1) | 17(1) | -1(1) | 11(1) | -4(1) |
| C(11B) | 22(1) | 15(1) | 16(1) | -2(1) | 12(1) | -2(1) |
| C(12B) | 18(1) | 10(1) | 18(1) | -1(1) | 12(1) | -1(1) |
| C(13B) | 20(1) | 19(1) | 18(1) | 3(1)  | 9(1)  | -1(1) |

|        |       |       |       |       |       |       |
|--------|-------|-------|-------|-------|-------|-------|
| C(14B) | 12(1) | 10(1) | 17(1) | 1(1)  | 9(1)  | 1(1)  |
| C(15B) | 13(1) | 15(1) | 16(1) | 3(1)  | 9(1)  | 1(1)  |
| C(16B) | 16(1) | 11(1) | 17(1) | -1(1) | 10(1) | 0(1)  |
| C(17B) | 20(1) | 11(1) | 23(1) | 1(1)  | 11(1) | -2(1) |
| C(18B) | 18(1) | 14(1) | 26(1) | 3(1)  | 9(1)  | -3(1) |
| C(19B) | 12(1) | 20(2) | 26(1) | 4(1)  | 12(1) | 1(1)  |
| C(20B) | 15(1) | 14(1) | 21(1) | 3(1)  | 11(1) | 2(1)  |

**Table S14.** Hydrogen coordinates ( $\times 10^4$ ) and isotropic displacement parameters ( $\text{\AA}^2 \times 10^3$ ) for **4b** (2).

|        | x        | y        | z        | U(eq) |
|--------|----------|----------|----------|-------|
| H(1A)  | 4390(30) | 4690(40) | 1172(19) | 16    |
| H(2A)  | 6350(30) | 4260(30) | 1400(20) | 17    |
| H(3A)  | 1859     | 9504     | 2231     | 25    |
| H(4A)  | 95       | 8753     | 1070     | 26    |
| H(5A)  | 206      | 7280     | -58      | 22    |
| H(6A)  | 2115     | 6531     | -87      | 19    |
| H(11A) | 5851     | 6635     | -915     | 19    |
| H(13A) | 7864     | 5379     | -169     | 28    |
| H(13B) | 8128     | 4792     | 820      | 28    |
| H(13C) | 8527     | 6354     | 681      | 28    |
| H(15A) | 6393     | 6845     | 2924     | 17    |
| H(15B) | 6656     | 8491     | 2938     | 17    |
| H(16A) | 8308     | 6196     | 2820     | 18    |
| H(16B) | 8764     | 6797     | 2058     | 18    |
| H(17A) | 8629     | 8389     | 3546     | 22    |
| H(17B) | 9872     | 7912     | 3420     | 22    |
| H(18A) | 9513     | 9434     | 2206     | 25    |
| H(18B) | 9405     | 10324    | 3025     | 25    |
| H(19A) | 7263     | 10257    | 2410     | 23    |
| H(19B) | 7748     | 10827    | 1656     | 23    |
| H(20A) | 7415     | 8633     | 944      | 18    |
| H(20B) | 6169     | 9137     | 1054     | 18    |
| H(1B)  | 4400(30) | -250(40) | 3480(20) | 16    |
| H(2B)  | 6440(30) | -780(30) | 4310(20) | 16    |
| H(3B)  | 1975     | 4639     | 1123     | 23    |
| H(4B)  | 170      | 3992     | 1355     | 24    |



|        |      |      |      |    |
|--------|------|------|------|----|
| H(5B)  | 216  | 2482 | 2510 | 23 |
| H(6B)  | 2077 | 1586 | 3508 | 20 |
| H(11B) | 5781 | 1606 | 6332 | 19 |
| H(13D) | 7769 | 274  | 6642 | 28 |
| H(13E) | 8464 | 1361 | 6227 | 28 |
| H(13F) | 8130 | -172 | 5803 | 28 |
| H(15C) | 6713 | 3508 | 2951 | 16 |
| H(15D) | 6458 | 1861 | 2825 | 16 |
| H(16C) | 6095 | 4133 | 4537 | 16 |
| H(16D) | 7314 | 3649 | 5330 | 16 |
| H(17C) | 7647 | 5866 | 4812 | 21 |
| H(17D) | 7261 | 5284 | 3811 | 21 |
| H(18C) | 9442 | 4502 | 5270 | 23 |
| H(18D) | 9408 | 5411 | 4419 | 23 |
| H(19C) | 8736 | 3471 | 3466 | 21 |
| H(19D) | 9934 | 3001 | 4283 | 21 |
| H(20C) | 8740 | 1842 | 4976 | 18 |
| H(20D) | 8365 | 1269 | 3974 | 18 |

**Table S15.** Torsion angles [°] for **4b** (2).

|                           |             |                          |           |
|---------------------------|-------------|--------------------------|-----------|
| O(1A)-C(8A)-C(9A)-O(2A)   | -26.8(3)    | N(2A)-C(2A)-C(3A)-C(4A)  | -176.7(3) |
| O(1A)-C(8A)-C(9A)-C(10A)  | 90.7(2)     | N(2A)-C(2A)-C(7A)-N(1A)  | -1.1(3)   |
| O(1A)-C(8A)-C(9A)-C(14A)  | -146.99(18) | N(2A)-C(2A)-C(7A)-C(6A)  | 176.9(2)  |
| O(1A)-C(8A)-C(12A)-O(3A)  | 85.9(3)     | C(1A)-N(1A)-C(7A)-C(2A)  | 1.9(3)    |
| O(1A)-C(8A)-C(12A)-C(11A) | -93.6(2)    | C(1A)-N(1A)-C(7A)-C(6A)  | -175.8(3) |
| O(2A)-C(9A)-C(10A)-C(11A) | 133.1(2)    | C(1A)-N(1A)-C(8A)-O(1A)  | 123.0(2)  |
| O(2A)-C(9A)-C(10A)-C(13A) | -46.4(3)    | C(1A)-N(1A)-C(8A)-C(9A)  | -2.5(3)   |
| O(2A)-C(9A)-C(14A)-C(15A) | -73.2(2)    | C(1A)-N(1A)-C(8A)-C(12A) | -119.5(3) |
| O(2A)-C(9A)-C(14A)-C(16A) | 44.1(2)     | C(1A)-N(2A)-C(2A)-C(3A)  | 177.9(3)  |
| O(2A)-C(9A)-C(14A)-C(20A) | 164.80(18)  | C(1A)-N(2A)-C(2A)-C(7A)  | -0.2(3)   |
| N(1A)-C(1A)-C(15A)-C(14A) | 34.2(3)     | C(2A)-N(2A)-C(1A)-N(1A)  | 1.5(3)    |
| N(1A)-C(8A)-C(9A)-O(2A)   | 98.1(2)     | C(2A)-N(2A)-C(1A)-C(15A) | -171.7(3) |
| N(1A)-C(8A)-C(9A)-C(10A)  | -144.4(2)   | C(2A)-C(3A)-C(4A)-C(5A)  | -0.3(5)   |
| N(1A)-C(8A)-C(9A)-C(14A)  | -22.1(3)    | C(3A)-C(2A)-C(7A)-N(1A)  | -179.4(2) |
| N(1A)-C(8A)-C(12A)-O(3A)  | -33.8(4)    | C(3A)-C(2A)-C(7A)-C(6A)  | -1.4(4)   |
| N(1A)-C(8A)-C(12A)-C(11A) | 146.8(2)    | C(3A)-C(4A)-C(5A)-C(6A)  | -0.8(5)   |
| N(2A)-C(1A)-C(15A)-C(14A) | -152.9(3)   | C(4A)-C(5A)-C(6A)-C(7A)  | 0.8(4)    |

|                             |             |                             |             |
|-----------------------------|-------------|-----------------------------|-------------|
| C(5A)-C(6A)-C(7A)-N(1A)     | 177.7(3)    | C(17A)-C(18A)-C(19A)-C(20A) | -54.0(3)    |
| C(5A)-C(6A)-C(7A)-C(2A)     | 0.3(4)      | C(18A)-C(19A)-C(20A)-C(14A) | 55.9(3)     |
| C(7A)-N(1A)-C(1A)-N(2A)     | -2.3(3)     | C(20A)-C(14A)-C(15A)-C(1A)  | 67.0(3)     |
| C(7A)-N(1A)-C(1A)-C(15A)    | 171.6(2)    | C(20A)-C(14A)-C(16A)-C(17A) | 55.8(2)     |
| C(7A)-N(1A)-C(8A)-O(1A)     | -50.9(3)    | O(1B)-C(8B)-C(9B)-O(2B)     | 28.8(2)     |
| C(7A)-N(1A)-C(8A)-C(9A)     | -176.4(2)   | O(1B)-C(8B)-C(9B)-C(10B)    | -89.0(2)    |
| C(7A)-N(1A)-C(8A)-C(12A)    | 66.6(3)     | O(1B)-C(8B)-C(9B)-C(14B)    | 148.85(18)  |
| C(7A)-C(2A)-C(3A)-C(4A)     | 1.3(4)      | O(1B)-C(8B)-C(12B)-O(3B)    | -87.8(3)    |
| C(8A)-N(1A)-C(1A)-N(2A)     | -177.2(2)   | O(1B)-C(8B)-C(12B)-C(11B)   | 91.8(2)     |
| C(8A)-N(1A)-C(1A)-C(15A)    | -3.4(4)     | O(2B)-C(9B)-C(10B)-C(11B)   | -133.1(2)   |
| C(8A)-N(1A)-C(7A)-C(2A)     | 176.8(2)    | O(2B)-C(9B)-C(10B)-C(13B)   | 47.3(3)     |
| C(8A)-N(1A)-C(7A)-C(6A)     | -0.9(4)     | O(2B)-C(9B)-C(14B)-C(15B)   | 70.8(2)     |
| C(8A)-C(9A)-C(10A)-C(11A)   | 16.0(3)     | O(2B)-C(9B)-C(14B)-C(16B)   | -167.35(17) |
| C(8A)-C(9A)-C(10A)-C(13A)   | -163.5(2)   | O(2B)-C(9B)-C(14B)-C(20B)   | -47.0(2)    |
| C(8A)-C(9A)-C(14A)-C(15A)   | 49.2(3)     | N(1B)-C(1B)-C(15B)-C(14B)   | -34.5(3)    |
| C(8A)-C(9A)-C(14A)-C(16A)   | 166.52(19)  | N(1B)-C(8B)-C(9B)-O(2B)     | -96.9(2)    |
| C(8A)-C(9A)-C(14A)-C(20A)   | -72.8(2)    | N(1B)-C(8B)-C(9B)-C(10B)    | 145.3(2)    |
| C(9A)-C(8A)-C(12A)-O(3A)    | -157.2(3)   | N(1B)-C(8B)-C(9B)-C(14B)    | 23.2(3)     |
| C(9A)-C(8A)-C(12A)-C(11A)   | 23.3(3)     | N(1B)-C(8B)-C(12B)-O(3B)    | 32.5(4)     |
| C(9A)-C(10A)-C(11A)-C(12A)  | -1.6(3)     | N(1B)-C(8B)-C(12B)-C(11B)   | -147.9(2)   |
| C(9A)-C(14A)-C(15A)-C(1A)   | -55.5(3)    | N(2B)-C(1B)-C(15B)-C(14B)   | 151.2(3)    |
| C(9A)-C(14A)-C(16A)-C(17A)  | 178.30(19)  | N(2B)-C(2B)-C(3B)-C(4B)     | 179.0(3)    |
| C(9A)-C(14A)-C(20A)-C(19A)  | -176.58(19) | N(2B)-C(2B)-C(7B)-N(1B)     | 0.7(3)      |
| C(10A)-C(9A)-C(14A)-C(15A)  | 163.9(2)    | N(2B)-C(2B)-C(7B)-C(6B)     | -177.7(2)   |
| C(10A)-C(9A)-C(14A)-C(16A)  | -78.8(2)    | C(1B)-N(1B)-C(7B)-C(2B)     | -1.3(3)     |
| C(10A)-C(9A)-C(14A)-C(20A)  | 41.9(3)     | C(1B)-N(1B)-C(7B)-C(6B)     | 176.8(3)    |
| C(10A)-C(11A)-C(12A)-O(3A)  | 166.3(3)    | C(1B)-N(1B)-C(8B)-O(1B)     | -124.1(2)   |
| C(10A)-C(11A)-C(12A)-C(8A)  | -14.3(3)    | C(1B)-N(1B)-C(8B)-C(9B)     | 2.0(4)      |
| C(12A)-C(8A)-C(9A)-O(2A)    | -140.3(2)   | C(1B)-N(1B)-C(8B)-C(12B)    | 118.0(3)    |
| C(12A)-C(8A)-C(9A)-C(10A)   | -22.7(2)    | C(1B)-N(2B)-C(2B)-C(3B)     | -179.9(3)   |
| C(12A)-C(8A)-C(9A)-C(14A)   | 99.5(2)     | C(1B)-N(2B)-C(2B)-C(7B)     | 0.2(3)      |
| C(13A)-C(10A)-C(11A)-C(12A) | 177.9(3)    | C(2B)-N(2B)-C(1B)-N(1B)     | -1.1(3)     |
| C(14A)-C(9A)-C(10A)-C(11A)  | -106.5(2)   | C(2B)-N(2B)-C(1B)-C(15B)    | 173.4(3)    |
| C(14A)-C(9A)-C(10A)-C(13A)  | 73.9(3)     | C(2B)-C(3B)-C(4B)-C(5B)     | -0.5(4)     |
| C(14A)-C(16A)-C(17A)-C(18A) | -56.2(3)    | C(3B)-C(2B)-C(7B)-N(1B)     | -179.2(2)   |
| C(15A)-C(14A)-C(16A)-C(17A) | -64.6(3)    | C(3B)-C(2B)-C(7B)-C(6B)     | 2.5(4)      |
| C(15A)-C(14A)-C(20A)-C(19A) | 63.3(3)     | C(3B)-C(4B)-C(5B)-C(6B)     | 0.9(5)      |
| C(16A)-C(14A)-C(15A)-C(1A)  | -174.0(2)   | C(4B)-C(5B)-C(6B)-C(7B)     | 0.4(4)      |
| C(16A)-C(14A)-C(20A)-C(19A) | -55.2(3)    | C(5B)-C(6B)-C(7B)-N(1B)     | -179.8(3)   |
| C(16A)-C(17A)-C(18A)-C(19A) | 53.7(3)     | C(5B)-C(6B)-C(7B)-C(2B)     | -2.0(4)     |

|                            |             |                             |             |
|----------------------------|-------------|-----------------------------|-------------|
| C(7B)-N(1B)-C(1B)-N(2B)    | 1.6(3)      | C(10B)-C(9B)-C(14B)-C(15B)  | -165.08(19) |
| C(7B)-N(1B)-C(1B)-C(15B)   | -173.4(2)   | C(10B)-C(9B)-C(14B)-C(16B)  | -43.2(3)    |
| C(7B)-N(1B)-C(8B)-O(1B)    | 52.3(3)     | C(10B)-C(9B)-C(14B)-C(20B)  | 77.2(2)     |
| C(7B)-N(1B)-C(8B)-C(9B)    | 178.4(2)    | C(10B)-C(11B)-C(12B)-O(3B)  | -164.8(3)   |
| C(7B)-N(1B)-C(8B)-C(12B)   | -65.5(3)    | C(10B)-C(11B)-C(12B)-C(8B)  | 15.7(3)     |
| C(7B)-C(2B)-C(3B)-C(4B)    | -1.1(4)     | C(12B)-C(8B)-C(9B)-O(2B)    | 141.7(2)    |
| C(8B)-N(1B)-C(1B)-N(2B)    | 178.6(2)    | C(12B)-C(8B)-C(9B)-C(10B)   | 23.9(2)     |
| C(8B)-N(1B)-C(1B)-C(15B)   | 3.6(4)      | C(12B)-C(8B)-C(9B)-C(14B)   | -98.3(2)    |
| C(8B)-N(1B)-C(7B)-C(2B)    | -178.3(2)   | C(13B)-C(10B)-C(11B)-C(12B) | -179.2(2)   |
| C(8B)-N(1B)-C(7B)-C(6B)    | -0.2(5)     | C(14B)-C(9B)-C(10B)-C(11B)  | 105.1(2)    |
| C(8B)-C(9B)-C(10B)-C(11B)  | -16.6(3)    | C(14B)-C(9B)-C(10B)-C(13B)  | -74.5(3)    |
| C(8B)-C(9B)-C(10B)-C(13B)  | 163.8(2)    | C(14B)-C(16B)-C(17B)-C(18B) | -56.9(3)    |
| C(8B)-C(9B)-C(14B)-C(15B)  | -50.7(3)    | C(15B)-C(14B)-C(16B)-C(17B) | -64.0(2)    |
| C(8B)-C(9B)-C(14B)-C(16B)  | 71.1(2)     | C(15B)-C(14B)-C(20B)-C(19B) | 65.7(3)     |
| C(8B)-C(9B)-C(14B)-C(20B)  | -168.48(18) | C(16B)-C(14B)-C(15B)-C(1B)  | -65.7(3)    |
| C(9B)-C(8B)-C(12B)-O(3B)   | 155.6(3)    | C(16B)-C(14B)-C(20B)-C(19B) | -54.8(3)    |
| C(9B)-C(8B)-C(12B)-C(11B)  | -24.8(3)    | C(16B)-C(17B)-C(18B)-C(19B) | 54.9(3)     |
| C(9B)-C(10B)-C(11B)-C(12B) | 1.2(3)      | C(17B)-C(18B)-C(19B)-C(20B) | -53.5(3)    |
| C(9B)-C(14B)-C(15B)-C(1B)  | 56.6(3)     | C(18B)-C(19B)-C(20B)-C(14B) | 55.3(3)     |
| C(9B)-C(14B)-C(16B)-C(17B) | 176.00(19)  | C(20B)-C(14B)-C(15B)-C(1B)  | 175.3(2)    |
| C(9B)-C(14B)-C(20B)-C(19B) | -176.90(19) | C(20B)-C(14B)-C(16B)-C(17B) | 54.9(3)     |

**Table S16.** Hydrogen bonds for **4b** (2) [ $\text{\AA}$  and  $^\circ$ ].

| D-H...A               | d(D-H)  | d(H...A) | d(D...A) | $\angle(\text{DHA})$ |
|-----------------------|---------|----------|----------|----------------------|
| O(1A)-H(1A)...N(2B)   | 0.88(3) | 1.93(3)  | 2.810(3) | 172(3)               |
| O(2A)-H(2A)...O(3A)#1 | 0.88(3) | 1.96(3)  | 2.818(3) | 163(3)               |
| O(1B)-H(1B)...N(2A)#2 | 0.89(3) | 1.97(3)  | 2.833(3) | 165(3)               |
| O(2B)-H(2B)...O(3B)#3 | 0.88(3) | 1.96(3)  | 2.823(3) | 166(3)               |

Symmetry transformations used to generate equivalent atoms:

#1 -x+1,y-1/2,-z #2 x,y-1,z #3 -x+1,y-1/2,-z+1

### 6.3. Compound **4c**

X-ray diffraction data were collected at 100K on a Rigaku Synergy S diffractometer equipped with a HyPix600HE area-detector (kappa geometry, shutterless  $\omega$ -scan technique), using monochromatized Cu K $\alpha$ -radiation. The intensity data were integrated and corrected for absorption and decay by the CrysAlisPro program.<sup>1</sup> The structure was solved by direct methods using SHELXT<sup>2</sup> and refined on  $F^2$  using SHELXL-2018<sup>3</sup> in the OLEX2 program.<sup>4</sup> Positions of all atoms were found from the electron density-difference map. Atoms were refined with individual anisotropic (non-hydrogen atoms) or isotropic (hydrogen atoms) displacement parameters.

**Table S17.** Crystal data and structure refinement for **4c**.

|                                   |                                             |                   |
|-----------------------------------|---------------------------------------------|-------------------|
| Identification code               | <b>4c</b>                                   |                   |
| Empirical formula                 | C19 H20 N2 O4                               |                   |
| Formula weight                    | 340.37                                      |                   |
| Temperature                       | 100.01(10) K                                |                   |
| Wavelength                        | 1.54184 Å                                   |                   |
| Crystal system                    | Monoclinic                                  |                   |
| Space group                       | P2 <sub>1</sub>                             |                   |
| Unit cell dimensions              | a = 11.38512(6) Å                           | a = 90°.          |
|                                   | b = 9.48447(4) Å                            | b = 110.6652(6)°. |
|                                   | c = 15.80604(8) Å                           | g = 90°.          |
| Volume                            | 1596.950(14) Å <sup>3</sup>                 |                   |
| Z                                 | 4                                           |                   |
| Density (calculated)              | 1.416 g/cm <sup>3</sup>                     |                   |
| Absorption coefficient            | 0.822 mm <sup>-1</sup>                      |                   |
| F(000)                            | 720                                         |                   |
| Crystal size                      | 0.34 x 0.17 x 0.08 mm <sup>3</sup>          |                   |
| Theta range for data collection   | 2.988 to 79.491°.                           |                   |
| Index ranges                      | -14<=h<=14, -10<=k<=12, -20<=l<=20          |                   |
| Reflections collected             | 41676                                       |                   |
| Independent reflections           | 6778 [R(int) = 0.0282]                      |                   |
| Observed reflections              | 6769                                        |                   |
| Completeness to theta = 67.684°   | 100.0 %                                     |                   |
| Absorption correction             | Semi-empirical from equivalents             |                   |
| Max. and min. transmission        | 0.83418 and 0.83014                         |                   |
| Refinement method                 | Full-matrix least-squares on F <sup>2</sup> |                   |
| Data / restraints / parameters    | 6778 / 1 / 610                              |                   |
| Goodness-of-fit on F <sup>2</sup> | 1.040                                       |                   |
| Final R indices [I>2sigma(I)]     | R1 = 0.0275, wR2 = 0.0730                   |                   |
| R indices (all data)              | R1 = 0.0276, wR2 = 0.0731                   |                   |

|                              |                                    |
|------------------------------|------------------------------------|
| Absolute structure parameter | -0.03(4)                           |
| Extinction coefficient       | 0.0048(4)                          |
| Largest diff. peak and hole  | 0.274 and -0.157 e.Å <sup>-3</sup> |
| CCDC                         | <b>2233460</b>                     |

**Table S18.** Atomic coordinates ( $\times 10^4$ ) and equivalent isotropic displacement parameters ( $\text{Å}^2 \times 10^3$ ) for **4c**. U(eq) is defined as one third of the trace of the orthogonalized  $U^{ij}$  tensor.

|        | x       | y       | z       | U(eq) |
|--------|---------|---------|---------|-------|
| O(1A)  | 6797(1) | 5003(1) | 4146(1) | 14(1) |
| O(2A)  | 4409(1) | 5075(1) | 4025(1) | 14(1) |
| O(3A)  | 3841(1) | 7551(2) | 5055(1) | 18(1) |
| O(4A)  | 9242(1) | 9514(2) | 4792(1) | 24(1) |
| N(1A)  | 4347(1) | 8692(2) | 2247(1) | 16(1) |
| N(2A)  | 4450(1) | 7320(2) | 3423(1) | 13(1) |
| C(1A)  | 6473(2) | 6239(2) | 4515(1) | 12(1) |
| C(2A)  | 4998(2) | 6392(2) | 4196(1) | 12(1) |
| C(3A)  | 4783(2) | 6937(2) | 5057(1) | 14(1) |
| C(4A)  | 5884(2) | 6521(2) | 5819(1) | 17(1) |
| C(5A)  | 6811(2) | 6112(2) | 5542(1) | 15(1) |
| C(6A)  | 8052(2) | 5566(2) | 6152(1) | 20(1) |
| C(7A)  | 7147(2) | 7488(2) | 4221(1) | 12(1) |
| C(8A)  | 7152(2) | 8845(2) | 4764(1) | 15(1) |
| C(9A)  | 7981(2) | 9984(2) | 4588(1) | 20(1) |
| C(10A) | 9272(2) | 8349(2) | 4227(1) | 21(1) |
| C(11A) | 8526(2) | 7094(2) | 4372(1) | 17(1) |
| C(12A) | 6460(2) | 7751(2) | 3203(1) | 15(1) |
| C(13A) | 5085(2) | 7985(2) | 2951(1) | 13(1) |
| C(14A) | 3132(2) | 8439(2) | 2240(1) | 16(1) |
| C(15A) | 1975(2) | 8888(2) | 1619(1) | 20(1) |
| C(16A) | 898(2)  | 8427(2) | 1750(1) | 21(1) |
| C(17A) | 951(2)  | 7534(2) | 2470(1) | 20(1) |
| C(18A) | 2090(2) | 7095(2) | 3098(1) | 17(1) |
| C(19A) | 3170(2) | 7573(2) | 2966(1) | 15(1) |
| O(1B)  | 6775(1) | 15(1)   | 1768(1) | 15(1) |
| O(2B)  | 4368(1) | 67(1)   | 695(1)  | 14(1) |
| O(3B)  | 3774(1) | 2643(1) | -584(1) | 17(1) |

|        |         |         |         |       |
|--------|---------|---------|---------|-------|
| O(4B)  | 9075(1) | 4650(1) | 2371(1) | 21(1) |
| N(1B)  | 4319(1) | 3663(2) | 2471(1) | 16(1) |
| N(2B)  | 4399(1) | 2293(2) | 1341(1) | 13(1) |
| C(1B)  | 6421(2) | 1253(2) | 1241(1) | 13(1) |
| C(2B)  | 4939(2) | 1396(2) | 828(1)  | 12(1) |
| C(3B)  | 4710(2) | 1992(2) | -132(1) | 14(1) |
| C(4B)  | 5790(2) | 1595(2) | -360(1) | 16(1) |
| C(5B)  | 6737(2) | 1157(2) | 375(1)  | 14(1) |
| C(6B)  | 7957(2) | 603(2)  | 368(1)  | 19(1) |
| C(7B)  | 7082(2) | 2505(2) | 1880(1) | 13(1) |
| C(8B)  | 7023(2) | 3878(2) | 1339(1) | 15(1) |
| C(9B)  | 7795(2) | 5049(2) | 1940(1) | 19(1) |
| C(10B) | 9173(2) | 3457(2) | 2942(1) | 19(1) |
| C(11B) | 8482(2) | 2178(2) | 2412(1) | 16(1) |
| C(12B) | 6417(2) | 2695(2) | 2571(1) | 15(1) |
| C(13B) | 5045(2) | 2948(2) | 2137(1) | 13(1) |
| C(14B) | 3098(2) | 3430(2) | 1866(1) | 16(1) |
| C(15B) | 1948(2) | 3892(2) | 1903(1) | 20(1) |
| C(16B) | 866(2)  | 3454(2) | 1222(1) | 22(1) |
| C(17B) | 907(2)  | 2576(2) | 520(1)  | 20(1) |
| C(18B) | 2035(2) | 2117(2) | 466(1)  | 17(1) |
| C(19B) | 3126(2) | 2566(2) | 1151(1) | 14(1) |

**Table S19.** Bond lengths [ $\text{\AA}$ ] and angles [ $^\circ$ ] for **4c**.

|              |          |              |          |
|--------------|----------|--------------|----------|
| O(1A)-H(1A)  | 0.84(3)  | C(1A)-C(5A)  | 1.535(2) |
| O(1A)-C(1A)  | 1.415(2) | C(1A)-C(7A)  | 1.569(2) |
| O(2A)-H(2A)  | 0.91(3)  | C(2A)-C(3A)  | 1.554(2) |
| O(2A)-C(2A)  | 1.398(2) | C(3A)-C(4A)  | 1.453(2) |
| O(3A)-C(3A)  | 1.219(2) | C(4A)-H(4A)  | 1.00(3)  |
| O(4A)-C(9A)  | 1.427(2) | C(4A)-C(5A)  | 1.334(3) |
| O(4A)-C(10A) | 1.429(2) | C(5A)-C(6A)  | 1.494(3) |
| N(1A)-C(13A) | 1.317(2) | C(6A)-H(6A)  | 1.03(3)  |
| N(1A)-C(14A) | 1.400(2) | C(6A)-H(6B)  | 0.90(4)  |
| N(2A)-C(2A)  | 1.455(2) | C(6A)-H(6C)  | 0.99(3)  |
| N(2A)-C(13A) | 1.364(2) | C(7A)-C(8A)  | 1.546(2) |
| N(2A)-C(19A) | 1.400(2) | C(7A)-C(11A) | 1.548(2) |
| C(1A)-C(2A)  | 1.581(2) | C(7A)-C(12A) | 1.542(2) |

|               |          |                     |            |
|---------------|----------|---------------------|------------|
| C(8A)-H(8A)   | 0.99(3)  | C(4B)-H(4B)         | 1.00(3)    |
| C(8A)-H(8B)   | 0.98(2)  | C(4B)-C(5B)         | 1.342(3)   |
| C(8A)-C(9A)   | 1.524(3) | C(5B)-C(6B)         | 1.489(2)   |
| C(9A)-H(9A)   | 0.96(2)  | C(6B)-H(6D)         | 1.02(3)    |
| C(9A)-H(9B)   | 0.99(3)  | C(6B)-H(6E)         | 0.95(3)    |
| C(10A)-H(10A) | 0.98(3)  | C(6B)-H(6F)         | 0.94(4)    |
| C(10A)-H(10B) | 0.97(3)  | C(7B)-C(8B)         | 1.547(2)   |
| C(10A)-C(11A) | 1.527(3) | C(7B)-C(11B)        | 1.548(2)   |
| C(11A)-H(11A) | 1.00(3)  | C(7B)-C(12B)        | 1.543(2)   |
| C(11A)-H(11B) | 0.95(3)  | C(8B)-H(8C)         | 1.00(3)    |
| C(12A)-H(12A) | 0.95(3)  | C(8B)-H(8D)         | 0.99(3)    |
| C(12A)-H(12B) | 0.98(3)  | C(8B)-C(9B)         | 1.523(2)   |
| C(12A)-C(13A) | 1.489(2) | C(9B)-H(9C)         | 0.98(3)    |
| C(14A)-C(15A) | 1.403(2) | C(9B)-H(9D)         | 1.00(2)    |
| C(14A)-C(19A) | 1.399(2) | C(10B)-H(10C)       | 0.97(2)    |
| C(15A)-H(15A) | 0.96(3)  | C(10B)-H(10D)       | 0.99(2)    |
| C(15A)-C(16A) | 1.385(3) | C(10B)-C(11B)       | 1.526(3)   |
| C(16A)-H(16A) | 0.96(2)  | C(11B)-H(11C)       | 0.98(3)    |
| C(16A)-C(17A) | 1.403(3) | C(11B)-H(11D)       | 1.02(3)    |
| C(17A)-H(17A) | 0.97(3)  | C(12B)-H(12C)       | 0.97(3)    |
| C(17A)-C(18A) | 1.389(3) | C(12B)-H(12D)       | 0.94(3)    |
| C(18A)-H(18A) | 0.98(3)  | C(12B)-C(13B)       | 1.487(2)   |
| C(18A)-C(19A) | 1.394(2) | C(14B)-C(15B)       | 1.402(2)   |
| O(1B)-H(1B)   | 0.85(3)  | C(14B)-C(19B)       | 1.406(2)   |
| O(1B)-C(1B)   | 1.414(2) | C(15B)-H(15B)       | 0.95(3)    |
| O(2B)-H(2B)   | 0.85(3)  | C(15B)-C(16B)       | 1.383(3)   |
| O(2B)-C(2B)   | 1.400(2) | C(16B)-H(16B)       | 0.98(3)    |
| O(3B)-C(3B)   | 1.221(2) | C(16B)-C(17B)       | 1.403(3)   |
| O(4B)-C(9B)   | 1.425(2) | C(17B)-H(17B)       | 0.97(3)    |
| O(4B)-C(10B)  | 1.427(2) | C(17B)-C(18B)       | 1.386(3)   |
| N(1B)-C(13B)  | 1.316(2) | C(18B)-H(18B)       | 0.98(3)    |
| N(1B)-C(14B)  | 1.398(2) | C(18B)-C(19B)       | 1.396(2)   |
| N(2B)-C(2B)   | 1.453(2) | C(1A)-O(1A)-H(1A)   | 111.4(19)  |
| N(2B)-C(13B)  | 1.363(2) | C(2A)-O(2A)-H(2A)   | 111(2)     |
| N(2B)-C(19B)  | 1.396(2) | C(9A)-O(4A)-C(10A)  | 110.14(14) |
| C(1B)-C(2B)   | 1.585(2) | C(13A)-N(1A)-C(14A) | 104.73(14) |
| C(1B)-C(5B)   | 1.536(2) | C(13A)-N(2A)-C(2A)  | 125.89(14) |
| C(1B)-C(7B)   | 1.569(2) | C(13A)-N(2A)-C(19A) | 107.10(14) |
| C(2B)-C(3B)   | 1.551(2) | C(19A)-N(2A)-C(2A)  | 126.67(14) |
| C(3B)-C(4B)   | 1.449(2) | O(1A)-C(1A)-C(2A)   | 110.29(13) |

|                     |            |                      |            |
|---------------------|------------|----------------------|------------|
| O(1A)-C(1A)-C(5A)   | 111.49(14) | O(4A)-C(9A)-H(9B)    | 109.0(17)  |
| O(1A)-C(1A)-C(7A)   | 106.12(13) | C(8A)-C(9A)-H(9A)    | 110.0(15)  |
| C(5A)-C(1A)-C(2A)   | 100.73(13) | C(8A)-C(9A)-H(9B)    | 109.4(16)  |
| C(5A)-C(1A)-C(7A)   | 113.97(14) | H(9A)-C(9A)-H(9B)    | 107(2)     |
| C(7A)-C(1A)-C(2A)   | 114.33(14) | O(4A)-C(10A)-H(10A)  | 105.1(16)  |
| O(2A)-C(2A)-N(2A)   | 110.12(13) | O(4A)-C(10A)-H(10B)  | 110.6(16)  |
| O(2A)-C(2A)-C(1A)   | 111.25(14) | O(4A)-C(10A)-C(11A)  | 111.77(15) |
| O(2A)-C(2A)-C(3A)   | 104.68(13) | H(10A)-C(10A)-H(10B) | 106(2)     |
| N(2A)-C(2A)-C(1A)   | 114.57(14) | C(11A)-C(10A)-H(10A) | 111.3(16)  |
| N(2A)-C(2A)-C(3A)   | 112.38(14) | C(11A)-C(10A)-H(10B) | 111.9(15)  |
| C(3A)-C(2A)-C(1A)   | 103.24(13) | C(7A)-C(11A)-H(11A)  | 113.1(15)  |
| O(3A)-C(3A)-C(2A)   | 124.52(15) | C(7A)-C(11A)-H(11B)  | 110.6(14)  |
| O(3A)-C(3A)-C(4A)   | 129.29(16) | C(10A)-C(11A)-C(7A)  | 112.11(15) |
| C(4A)-C(3A)-C(2A)   | 106.16(14) | C(10A)-C(11A)-H(11A) | 105.9(16)  |
| C(3A)-C(4A)-H(4A)   | 122.4(16)  | C(10A)-C(11A)-H(11B) | 108.4(14)  |
| C(5A)-C(4A)-C(3A)   | 111.06(15) | H(11A)-C(11A)-H(11B) | 106(2)     |
| C(5A)-C(4A)-H(4A)   | 126.5(16)  | C(7A)-C(12A)-H(12A)  | 112.8(14)  |
| C(4A)-C(5A)-C(1A)   | 113.02(15) | C(7A)-C(12A)-H(12B)  | 107.8(15)  |
| C(4A)-C(5A)-C(6A)   | 124.57(16) | H(12A)-C(12A)-H(12B) | 108(2)     |
| C(6A)-C(5A)-C(1A)   | 122.41(15) | C(13A)-C(12A)-C(7A)  | 113.64(13) |
| C(5A)-C(6A)-H(6A)   | 111.1(16)  | C(13A)-C(12A)-H(12A) | 109.4(14)  |
| C(5A)-C(6A)-H(6B)   | 111(2)     | C(13A)-C(12A)-H(12B) | 104.6(14)  |
| C(5A)-C(6A)-H(6C)   | 111.3(18)  | N(1A)-C(13A)-N(2A)   | 113.22(15) |
| H(6A)-C(6A)-H(6B)   | 109(3)     | N(1A)-C(13A)-C(12A)  | 126.79(15) |
| H(6A)-C(6A)-H(6C)   | 105(3)     | N(2A)-C(13A)-C(12A)  | 119.70(15) |
| H(6B)-C(6A)-H(6C)   | 109(3)     | N(1A)-C(14A)-C(15A)  | 129.43(17) |
| C(8A)-C(7A)-C(1A)   | 111.75(13) | C(19A)-C(14A)-N(1A)  | 110.41(15) |
| C(8A)-C(7A)-C(11A)  | 108.12(14) | C(19A)-C(14A)-C(15A) | 120.13(16) |
| C(11A)-C(7A)-C(1A)  | 110.31(14) | C(14A)-C(15A)-H(15A) | 122.1(16)  |
| C(12A)-C(7A)-C(1A)  | 108.09(13) | C(16A)-C(15A)-C(14A) | 117.50(18) |
| C(12A)-C(7A)-C(8A)  | 110.26(14) | C(16A)-C(15A)-H(15A) | 120.4(16)  |
| C(12A)-C(7A)-C(11A) | 108.26(13) | C(15A)-C(16A)-H(16A) | 119.9(15)  |
| C(7A)-C(8A)-H(8A)   | 110.6(15)  | C(15A)-C(16A)-C(17A) | 121.69(17) |
| C(7A)-C(8A)-H(8B)   | 108.9(15)  | C(17A)-C(16A)-H(16A) | 118.4(15)  |
| H(8A)-C(8A)-H(8B)   | 109(2)     | C(16A)-C(17A)-H(17A) | 119.4(16)  |
| C(9A)-C(8A)-C(7A)   | 111.66(14) | C(18A)-C(17A)-C(16A) | 121.48(17) |
| C(9A)-C(8A)-H(8A)   | 109.4(15)  | C(18A)-C(17A)-H(17A) | 119.1(16)  |
| C(9A)-C(8A)-H(8B)   | 107.1(14)  | C(17A)-C(18A)-H(18A) | 121.1(14)  |
| O(4A)-C(9A)-C(8A)   | 112.09(16) | C(17A)-C(18A)-C(19A) | 116.52(17) |
| O(4A)-C(9A)-H(9A)   | 109.3(14)  | C(19A)-C(18A)-H(18A) | 122.4(14)  |



|                      |            |                      |            |
|----------------------|------------|----------------------|------------|
| C(14A)-C(19A)-N(2A)  | 104.49(15) | C(12B)-C(7B)-C(1B)   | 107.44(13) |
| C(18A)-C(19A)-N(2A)  | 132.79(17) | C(12B)-C(7B)-C(8B)   | 110.92(14) |
| C(18A)-C(19A)-C(14A) | 122.65(16) | C(12B)-C(7B)-C(11B)  | 107.88(13) |
| C(1B)-O(1B)-H(1B)    | 107.3(18)  | C(7B)-C(8B)-H(8C)    | 111.1(16)  |
| C(2B)-O(2B)-H(2B)    | 110(2)     | C(7B)-C(8B)-H(8D)    | 110.4(16)  |
| C(9B)-O(4B)-C(10B)   | 110.58(14) | H(8C)-C(8B)-H(8D)    | 105(2)     |
| C(13B)-N(1B)-C(14B)  | 104.93(14) | C(9B)-C(8B)-C(7B)    | 111.44(14) |
| C(13B)-N(2B)-C(2B)   | 125.83(14) | C(9B)-C(8B)-H(8C)    | 107.5(15)  |
| C(13B)-N(2B)-C(19B)  | 107.15(14) | C(9B)-C(8B)-H(8D)    | 111.6(16)  |
| C(19B)-N(2B)-C(2B)   | 126.88(14) | O(4B)-C(9B)-C(8B)    | 111.85(15) |
| O(1B)-C(1B)-C(2B)    | 110.77(13) | O(4B)-C(9B)-H(9C)    | 106.4(14)  |
| O(1B)-C(1B)-C(5B)    | 111.63(14) | O(4B)-C(9B)-H(9D)    | 110.0(13)  |
| O(1B)-C(1B)-C(7B)    | 106.07(13) | C(8B)-C(9B)-H(9C)    | 112.3(15)  |
| C(5B)-C(1B)-C(2B)    | 100.83(13) | C(8B)-C(9B)-H(9D)    | 109.1(14)  |
| C(5B)-C(1B)-C(7B)    | 114.13(14) | H(9C)-C(9B)-H(9D)    | 107(2)     |
| C(7B)-C(1B)-C(2B)    | 113.54(13) | O(4B)-C(10B)-H(10C)  | 110.7(14)  |
| O(2B)-C(2B)-N(2B)    | 110.16(13) | O(4B)-C(10B)-H(10D)  | 104.9(15)  |
| O(2B)-C(2B)-C(1B)    | 110.78(14) | O(4B)-C(10B)-C(11B)  | 111.89(15) |
| O(2B)-C(2B)-C(3B)    | 105.83(13) | H(10C)-C(10B)-H(10D) | 107.2(19)  |
| N(2B)-C(2B)-C(1B)    | 114.76(13) | C(11B)-C(10B)-H(10C) | 110.3(14)  |
| N(2B)-C(2B)-C(3B)    | 111.97(14) | C(11B)-C(10B)-H(10D) | 111.7(15)  |
| C(3B)-C(2B)-C(1B)    | 102.79(13) | C(7B)-C(11B)-H(11C)  | 107.5(14)  |
| O(3B)-C(3B)-C(2B)    | 124.59(15) | C(7B)-C(11B)-H(11D)  | 111.0(14)  |
| O(3B)-C(3B)-C(4B)    | 128.87(16) | C(10B)-C(11B)-C(7B)  | 111.82(15) |
| C(4B)-C(3B)-C(2B)    | 106.53(14) | C(10B)-C(11B)-H(11C) | 110.8(15)  |
| C(3B)-C(4B)-H(4B)    | 123.7(15)  | C(10B)-C(11B)-H(11D) | 107.1(15)  |
| C(5B)-C(4B)-C(3B)    | 110.93(15) | H(11C)-C(11B)-H(11D) | 109(2)     |
| C(5B)-C(4B)-H(4B)    | 125.3(15)  | C(7B)-C(12B)-H(12C)  | 108.5(14)  |
| C(4B)-C(5B)-C(1B)    | 112.61(15) | C(7B)-C(12B)-H(12D)  | 111.1(15)  |
| C(4B)-C(5B)-C(6B)    | 124.68(16) | H(12C)-C(12B)-H(12D) | 108(2)     |
| C(6B)-C(5B)-C(1B)    | 122.69(15) | C(13B)-C(12B)-C(7B)  | 112.99(14) |
| C(5B)-C(6B)-H(6D)    | 112.4(15)  | C(13B)-C(12B)-H(12C) | 106.8(14)  |
| C(5B)-C(6B)-H(6E)    | 110.1(18)  | C(13B)-C(12B)-H(12D) | 109.5(15)  |
| C(5B)-C(6B)-H(6F)    | 112(2)     | N(1B)-C(13B)-N(2B)   | 113.25(15) |
| H(6D)-C(6B)-H(6E)    | 105(2)     | N(1B)-C(13B)-C(12B)  | 127.21(15) |
| H(6D)-C(6B)-H(6F)    | 110(3)     | N(2B)-C(13B)-C(12B)  | 119.27(15) |
| H(6E)-C(6B)-H(6F)    | 107(3)     | N(1B)-C(14B)-C(15B)  | 129.77(17) |
| C(8B)-C(7B)-C(1B)    | 111.31(13) | N(1B)-C(14B)-C(19B)  | 110.06(15) |
| C(8B)-C(7B)-C(11B)   | 107.78(14) | C(15B)-C(14B)-C(19B) | 120.15(16) |
| C(11B)-C(7B)-C(1B)   | 111.47(14) | C(14B)-C(15B)-H(15B) | 121.7(16)  |

|                      |            |                      |            |
|----------------------|------------|----------------------|------------|
| C(16B)-C(15B)-C(14B) | 117.57(18) | C(18B)-C(17B)-H(17B) | 117.6(16)  |
| C(16B)-C(15B)-H(15B) | 120.7(16)  | C(17B)-C(18B)-H(18B) | 121.6(14)  |
| C(15B)-C(16B)-H(16B) | 119.3(15)  | C(17B)-C(18B)-C(19B) | 116.55(17) |
| C(15B)-C(16B)-C(17B) | 121.67(17) | C(19B)-C(18B)-H(18B) | 121.8(14)  |
| C(17B)-C(16B)-H(16B) | 119.0(15)  | N(2B)-C(19B)-C(14B)  | 104.57(15) |
| C(16B)-C(17B)-H(17B) | 120.6(16)  | C(18B)-C(19B)-N(2B)  | 133.04(16) |
| C(18B)-C(17B)-C(16B) | 121.71(17) | C(18B)-C(19B)-C(14B) | 122.34(15) |

**Table S20.** Anisotropic displacement parameters ( $\text{\AA}^2 \times 10^3$ ) for **4c**. The anisotropic displacement factor exponent takes the form:  $-2p^2[h^2 a^*2U^{11} + \dots + 2hk a^* b^* U^{12}]$

|        | U <sup>11</sup> | U <sup>22</sup> | U <sup>33</sup> | U <sup>23</sup> | U <sup>13</sup> | U <sup>12</sup> |
|--------|-----------------|-----------------|-----------------|-----------------|-----------------|-----------------|
| O(1A)  | 17(1)           | 10(1)           | 17(1)           | -1(1)           | 7(1)            | 0(1)            |
| O(2A)  | 17(1)           | 11(1)           | 14(1)           | -1(1)           | 6(1)            | -2(1)           |
| O(3A)  | 19(1)           | 16(1)           | 22(1)           | -5(1)           | 9(1)            | 0(1)            |
| O(4A)  | 19(1)           | 21(1)           | 28(1)           | -3(1)           | 6(1)            | -6(1)           |
| N(1A)  | 16(1)           | 17(1)           | 12(1)           | 1(1)            | 4(1)            | 0(1)            |
| N(2A)  | 12(1)           | 13(1)           | 14(1)           | 2(1)            | 4(1)            | 1(1)            |
| C(1A)  | 14(1)           | 10(1)           | 12(1)           | -1(1)           | 4(1)            | 1(1)            |
| C(2A)  | 15(1)           | 10(1)           | 13(1)           | 1(1)            | 5(1)            | -1(1)           |
| C(3A)  | 18(1)           | 11(1)           | 15(1)           | -2(1)           | 8(1)            | -4(1)           |
| C(4A)  | 21(1)           | 15(1)           | 14(1)           | -1(1)           | 6(1)            | -1(1)           |
| C(5A)  | 19(1)           | 10(1)           | 14(1)           | 0(1)            | 4(1)            | -2(1)           |
| C(6A)  | 20(1)           | 21(1)           | 15(1)           | 4(1)            | 3(1)            | 0(1)            |
| C(7A)  | 13(1)           | 10(1)           | 15(1)           | 1(1)            | 5(1)            | 1(1)            |
| C(8A)  | 18(1)           | 12(1)           | 16(1)           | -2(1)           | 6(1)            | -1(1)           |
| C(9A)  | 23(1)           | 14(1)           | 25(1)           | -1(1)           | 10(1)           | -2(1)           |
| C(10A) | 16(1)           | 21(1)           | 27(1)           | 2(1)            | 9(1)            | 0(1)            |
| C(11A) | 14(1)           | 16(1)           | 21(1)           | 2(1)            | 5(1)            | 2(1)            |
| C(12A) | 16(1)           | 16(1)           | 13(1)           | 2(1)            | 6(1)            | 2(1)            |
| C(13A) | 16(1)           | 12(1)           | 12(1)           | -1(1)           | 5(1)            | 0(1)            |
| C(14A) | 16(1)           | 15(1)           | 15(1)           | -1(1)           | 4(1)            | 0(1)            |
| C(15A) | 19(1)           | 21(1)           | 17(1)           | 2(1)            | 2(1)            | 2(1)            |
| C(16A) | 14(1)           | 22(1)           | 20(1)           | -4(1)           | -1(1)           | 2(1)            |
| C(17A) | 16(1)           | 18(1)           | 25(1)           | -5(1)           | 6(1)            | -1(1)           |
| C(18A) | 17(1)           | 15(1)           | 20(1)           | -1(1)           | 6(1)            | 0(1)            |
| C(19A) | 15(1)           | 12(1)           | 15(1)           | -1(1)           | 2(1)            | 1(1)            |

|        |       |       |       |       |       |       |
|--------|-------|-------|-------|-------|-------|-------|
| O(1B)  | 17(1) | 10(1) | 15(1) | 1(1)  | 3(1)  | 1(1)  |
| O(2B)  | 16(1) | 12(1) | 13(1) | 0(1)  | 5(1)  | -2(1) |
| O(3B)  | 17(1) | 15(1) | 17(1) | 4(1)  | 3(1)  | 1(1)  |
| O(4B)  | 18(1) | 17(1) | 26(1) | -1(1) | 5(1)  | -3(1) |
| N(1B)  | 16(1) | 16(1) | 15(1) | -1(1) | 7(1)  | -1(1) |
| N(2B)  | 13(1) | 14(1) | 12(1) | -1(1) | 4(1)  | 1(1)  |
| C(1B)  | 13(1) | 12(1) | 13(1) | 1(1)  | 4(1)  | 2(1)  |
| C(2B)  | 14(1) | 11(1) | 12(1) | -1(1) | 4(1)  | 0(1)  |
| C(3B)  | 18(1) | 12(1) | 12(1) | -1(1) | 3(1)  | -3(1) |
| C(4B)  | 21(1) | 16(1) | 13(1) | -1(1) | 7(1)  | -2(1) |
| C(5B)  | 17(1) | 11(1) | 16(1) | -3(1) | 8(1)  | -3(1) |
| C(6B)  | 16(1) | 24(1) | 20(1) | -4(1) | 7(1)  | 0(1)  |
| C(7B)  | 12(1) | 12(1) | 12(1) | 0(1)  | 2(1)  | 1(1)  |
| C(8B)  | 17(1) | 12(1) | 15(1) | 0(1)  | 4(1)  | 0(1)  |
| C(9B)  | 19(1) | 14(1) | 21(1) | -2(1) | 3(1)  | 0(1)  |
| C(10B) | 15(1) | 17(1) | 20(1) | -1(1) | 1(1)  | 1(1)  |
| C(11B) | 14(1) | 14(1) | 18(1) | 0(1)  | 2(1)  | 2(1)  |
| C(12B) | 16(1) | 16(1) | 12(1) | -2(1) | 4(1)  | 0(1)  |
| C(13B) | 16(1) | 11(1) | 12(1) | 0(1)  | 6(1)  | -2(1) |
| C(14B) | 16(1) | 15(1) | 16(1) | 1(1)  | 6(1)  | -1(1) |
| C(15B) | 22(1) | 19(1) | 23(1) | -1(1) | 11(1) | 2(1)  |
| C(16B) | 17(1) | 23(1) | 28(1) | 5(1)  | 10(1) | 2(1)  |
| C(17B) | 15(1) | 22(1) | 21(1) | 5(1)  | 5(1)  | -1(1) |
| C(18B) | 16(1) | 17(1) | 16(1) | 1(1)  | 4(1)  | -1(1) |
| C(19B) | 14(1) | 14(1) | 17(1) | 4(1)  | 6(1)  | 2(1)  |

**Table S21.** Hydrogen coordinates ( $\times 10^4$ ) and isotropic displacement parameters ( $\text{\AA}^2 \times 10^3$ ) for **4c**.

|       | x        | y        | z        | U(eq) |
|-------|----------|----------|----------|-------|
| H(1A) | 6540(30) | 4270(30) | 4328(19) | 29(7) |
| H(2A) | 4500(30) | 4670(40) | 3530(20) | 37(8) |
| H(4A) | 5900(20) | 6540(30) | 6453(19) | 27(6) |
| H(6A) | 8000(30) | 5210(30) | 6755(19) | 33(7) |
| H(6B) | 8650(30) | 6230(40) | 6270(20) | 51(9) |
| H(6C) | 8320(30) | 4740(40) | 5880(20) | 43(8) |
| H(8A) | 6290(20) | 9210(30) | 4613(17) | 21(6) |

|        |           |           |          |       |
|--------|-----------|-----------|----------|-------|
| H(8B)  | 7500(20)  | 8630(30)  | 5409(16) | 18(5) |
| H(9A)  | 7640(20)  | 10280(30) | 3968(17) | 17(6) |
| H(9B)  | 7980(30)  | 10820(30) | 4960(19) | 32(7) |
| H(10A) | 10170(20) | 8110(30)  | 4391(17) | 24(6) |
| H(10B) | 8990(20)  | 8640(30)  | 3597(17) | 21(6) |
| H(11A) | 9000(20)  | 6740(30)  | 5000(18) | 27(7) |
| H(11B) | 8560(20)  | 6360(30)  | 3972(16) | 15(5) |
| H(12A) | 6820(20)  | 8510(30)  | 2976(16) | 15    |
| H(12B) | 6530(20)  | 6890(30)  | 2879(17) | 19(6) |
| H(15A) | 1920(20)  | 9490(30)  | 1120(19) | 30(7) |
| H(16A) | 90(20)    | 8710(30)  | 1340(16) | 21(6) |
| H(17A) | 180(20)   | 7220(30)  | 2535(17) | 25(6) |
| H(18A) | 2120(20)  | 6460(30)  | 3598(16) | 18(6) |
| H(1B)  | 6540(20)  | -690(30)  | 1408(18) | 23(6) |
| H(2B)  | 4470(30)  | -320(30)  | 1200(20) | 33(7) |
| H(4B)  | 5820(20)  | 1670(30)  | -986(18) | 25(6) |
| H(6D)  | 7930(30)  | 350(30)   | -268(19) | 29(7) |
| H(6E)  | 8160(30)  | -250(40)  | 690(20)  | 38(8) |
| H(6F)  | 8620(30)  | 1230(40)  | 640(20)  | 49(9) |
| H(8C)  | 7360(20)  | 3730(30)  | 842(17)  | 23(6) |
| H(8D)  | 6140(20)  | 4170(30)  | 1029(18) | 25(6) |
| H(9C)  | 7800(20)  | 5910(30)  | 1601(16) | 19(6) |
| H(9D)  | 7420(20)  | 5300(30)  | 2406(16) | 15(5) |
| H(10C) | 8870(20)  | 3680(30)  | 3423(15) | 12(5) |
| H(10D) | 10090(20) | 3280(30)  | 3227(16) | 18(6) |
| H(11C) | 8510(20)  | 1390(30)  | 2818(17) | 20(6) |
| H(11D) | 8940(20)  | 1890(30)  | 1984(17) | 23(6) |
| H(12C) | 6510(20)  | 1830(30)  | 2919(16) | 14(5) |
| H(12D) | 6780(20)  | 3430(30)  | 2977(17) | 17(6) |
| H(15B) | 1910(20)  | 4510(30)  | 2366(19) | 29(7) |
| H(16B) | 50(20)    | 3760(30)  | 1232(16) | 23(6) |
| H(17B) | 140(30)   | 2270(30)  | 53(19)   | 24(6) |
| H(18B) | 2060(20)  | 1490(30)  | -23(16)  | 17    |

**Table S22.** Torsion angles [°] for **4c**.

|                         |            |                         |             |
|-------------------------|------------|-------------------------|-------------|
| O(1A)-C(1A)-C(2A)-O(2A) | 28.47(18)  | O(1A)-C(1A)-C(2A)-C(3A) | 140.24(14)  |
| O(1A)-C(1A)-C(2A)-N(2A) | -97.25(17) | O(1A)-C(1A)-C(5A)-C(4A) | -133.01(16) |

|                            |             |                             |             |
|----------------------------|-------------|-----------------------------|-------------|
| O(1A)-C(1A)-C(5A)-C(6A)    | 46.3(2)     | C(7A)-C(1A)-C(5A)-C(6A)     | -73.8(2)    |
| O(1A)-C(1A)-C(7A)-C(8A)    | -165.88(13) | C(7A)-C(8A)-C(9A)-O(4A)     | -57.2(2)    |
| O(1A)-C(1A)-C(7A)-C(11A)   | -45.57(17)  | C(7A)-C(12A)-C(13A)-N(1A)   | 154.45(17)  |
| O(1A)-C(1A)-C(7A)-C(12A)   | 72.62(16)   | C(7A)-C(12A)-C(13A)-N(2A)   | -32.2(2)    |
| O(2A)-C(2A)-C(3A)-O(3A)    | -84.4(2)    | C(8A)-C(7A)-C(11A)-C(10A)   | -49.18(19)  |
| O(2A)-C(2A)-C(3A)-C(4A)    | 93.79(15)   | C(8A)-C(7A)-C(12A)-C(13A)   | -68.34(19)  |
| O(3A)-C(3A)-C(4A)-C(5A)    | -168.19(19) | C(9A)-O(4A)-C(10A)-C(11A)   | -61.3(2)    |
| O(4A)-C(10A)-C(11A)-C(7A)  | 56.3(2)     | C(10A)-O(4A)-C(9A)-C(8A)    | 61.93(19)   |
| N(1A)-C(14A)-C(15A)-C(16A) | 176.98(19)  | C(11A)-C(7A)-C(8A)-C(9A)    | 49.35(19)   |
| N(1A)-C(14A)-C(19A)-N(2A)  | 0.71(19)    | C(11A)-C(7A)-C(12A)-C(13A)  | 173.57(15)  |
| N(1A)-C(14A)-C(19A)-C(18A) | -176.72(17) | C(12A)-C(7A)-C(8A)-C(9A)    | -68.83(18)  |
| N(2A)-C(2A)-C(3A)-O(3A)    | 35.1(2)     | C(12A)-C(7A)-C(11A)-C(10A)  | 70.26(19)   |
| N(2A)-C(2A)-C(3A)-C(4A)    | -146.70(15) | C(13A)-N(1A)-C(14A)-C(15A)  | -177.32(19) |
| C(1A)-C(2A)-C(3A)-O(3A)    | 159.10(17)  | C(13A)-N(1A)-C(14A)-C(19A)  | 0.6(2)      |
| C(1A)-C(2A)-C(3A)-C(4A)    | -22.73(18)  | C(13A)-N(2A)-C(2A)-O(2A)    | -123.24(17) |
| C(1A)-C(7A)-C(8A)-C(9A)    | 170.93(14)  | C(13A)-N(2A)-C(2A)-C(1A)    | 3.1(2)      |
| C(1A)-C(7A)-C(11A)-C(10A)  | -171.66(14) | C(13A)-N(2A)-C(2A)-C(3A)    | 120.49(17)  |
| C(1A)-C(7A)-C(12A)-C(13A)  | 54.08(19)   | C(13A)-N(2A)-C(19A)-C(14A)  | -1.73(19)   |
| C(2A)-N(2A)-C(13A)-N(1A)   | 175.97(15)  | C(13A)-N(2A)-C(19A)-C(18A)  | 175.32(19)  |
| C(2A)-N(2A)-C(13A)-C(12A)  | 1.8(3)      | C(14A)-N(1A)-C(13A)-N(2A)   | -1.8(2)     |
| C(2A)-N(2A)-C(19A)-C(14A)  | -175.32(16) | C(14A)-N(1A)-C(13A)-C(12A)  | 171.92(17)  |
| C(2A)-N(2A)-C(19A)-C(18A)  | 1.7(3)      | C(14A)-C(15A)-C(16A)-C(17A) | -0.6(3)     |
| C(2A)-C(1A)-C(5A)-C(4A)    | -16.0(2)    | C(15A)-C(14A)-C(19A)-N(2A)  | 178.87(16)  |
| C(2A)-C(1A)-C(5A)-C(6A)    | 163.33(16)  | C(15A)-C(14A)-C(19A)-C(18A) | 1.4(3)      |
| C(2A)-C(1A)-C(7A)-C(8A)    | 72.33(17)   | C(15A)-C(16A)-C(17A)-C(18A) | 1.4(3)      |
| C(2A)-C(1A)-C(7A)-C(11A)   | -167.35(14) | C(16A)-C(17A)-C(18A)-C(19A) | -0.8(3)     |
| C(2A)-C(1A)-C(7A)-C(12A)   | -49.17(18)  | C(17A)-C(18A)-C(19A)-N(2A)  | -177.23(19) |
| C(2A)-C(3A)-C(4A)-C(5A)    | 13.8(2)     | C(17A)-C(18A)-C(19A)-C(14A) | -0.6(3)     |
| C(3A)-C(4A)-C(5A)-C(1A)    | 1.8(2)      | C(19A)-N(2A)-C(2A)-O(2A)    | 49.2(2)     |
| C(3A)-C(4A)-C(5A)-C(6A)    | -177.48(17) | C(19A)-N(2A)-C(2A)-C(1A)    | 175.51(15)  |
| C(5A)-C(1A)-C(2A)-O(2A)    | -89.41(15)  | C(19A)-N(2A)-C(2A)-C(3A)    | -67.1(2)    |
| C(5A)-C(1A)-C(2A)-N(2A)    | 144.88(14)  | C(19A)-N(2A)-C(13A)-N(1A)   | 2.3(2)      |
| C(5A)-C(1A)-C(2A)-C(3A)    | 22.36(17)   | C(19A)-N(2A)-C(13A)-C(12A)  | -171.90(15) |
| C(5A)-C(1A)-C(7A)-C(8A)    | -42.80(19)  | C(19A)-C(14A)-C(15A)-C(16A) | -0.8(3)     |
| C(5A)-C(1A)-C(7A)-C(11A)   | 77.52(17)   | O(1B)-C(1B)-C(2B)-O(2B)     | -28.95(18)  |
| C(5A)-C(1A)-C(7A)-C(12A)   | -164.30(14) | O(1B)-C(1B)-C(2B)-N(2B)     | 96.57(17)   |
| C(7A)-C(1A)-C(2A)-O(2A)    | 147.94(13)  | O(1B)-C(1B)-C(2B)-C(3B)     | -141.61(14) |
| C(7A)-C(1A)-C(2A)-N(2A)    | 22.2(2)     | O(1B)-C(1B)-C(5B)-C(4B)     | 134.41(16)  |
| C(7A)-C(1A)-C(2A)-C(3A)    | -100.29(15) | O(1B)-C(1B)-C(5B)-C(6B)     | -44.2(2)    |
| C(7A)-C(1A)-C(5A)-C(4A)    | 106.88(17)  | O(1B)-C(1B)-C(7B)-C(8B)     | 167.10(13)  |

|                            |             |                             |             |
|----------------------------|-------------|-----------------------------|-------------|
| O(1B)-C(1B)-C(7B)-C(11B)   | 46.72(17)   | C(7B)-C(1B)-C(2B)-C(3B)     | 99.18(15)   |
| O(1B)-C(1B)-C(7B)-C(12B)   | -71.28(15)  | C(7B)-C(1B)-C(5B)-C(4B)     | -105.33(17) |
| O(2B)-C(2B)-C(3B)-O(3B)    | 86.4(2)     | C(7B)-C(1B)-C(5B)-C(6B)     | 76.0(2)     |
| O(2B)-C(2B)-C(3B)-C(4B)    | -92.58(15)  | C(7B)-C(8B)-C(9B)-O(4B)     | 57.69(19)   |
| O(3B)-C(3B)-C(4B)-C(5B)    | 166.73(19)  | C(7B)-C(12B)-C(13B)-N(1B)   | -151.23(17) |
| O(4B)-C(10B)-C(11B)-C(7B)  | -56.4(2)    | C(7B)-C(12B)-C(13B)-N(2B)   | 35.1(2)     |
| N(1B)-C(14B)-C(15B)-C(16B) | -177.50(19) | C(8B)-C(7B)-C(11B)-C(10B)   | 50.21(19)   |
| N(1B)-C(14B)-C(19B)-N(2B)  | -0.3(2)     | C(8B)-C(7B)-C(12B)-C(13B)   | 64.92(19)   |
| N(1B)-C(14B)-C(19B)-C(18B) | 177.47(16)  | C(9B)-O(4B)-C(10B)-C(11B)   | 60.72(19)   |
| N(2B)-C(2B)-C(3B)-O(3B)    | -33.6(2)    | C(10B)-O(4B)-C(9B)-C(8B)    | -61.50(19)  |
| N(2B)-C(2B)-C(3B)-C(4B)    | 147.38(14)  | C(11B)-C(7B)-C(8B)-C(9B)    | -50.73(18)  |
| C(1B)-C(2B)-C(3B)-O(3B)    | -157.33(17) | C(11B)-C(7B)-C(12B)-C(13B)  | -177.25(15) |
| C(1B)-C(2B)-C(3B)-C(4B)    | 23.68(17)   | C(12B)-C(7B)-C(8B)-C(9B)    | 67.16(18)   |
| C(1B)-C(7B)-C(8B)-C(9B)    | -173.26(13) | C(12B)-C(7B)-C(11B)-C(10B)  | -69.63(19)  |
| C(1B)-C(7B)-C(11B)-C(10B)  | 172.64(14)  | C(13B)-N(1B)-C(14B)-C(15B)  | 177.35(19)  |
| C(1B)-C(7B)-C(12B)-C(13B)  | -56.95(19)  | C(13B)-N(1B)-C(14B)-C(19B)  | -0.9(2)     |
| C(2B)-N(2B)-C(13B)-N(1B)   | -178.07(16) | C(13B)-N(2B)-C(2B)-O(2B)    | 123.30(17)  |
| C(2B)-N(2B)-C(13B)-C(12B)  | -3.5(3)     | C(13B)-N(2B)-C(2B)-C(1B)    | -2.5(2)     |
| C(2B)-N(2B)-C(19B)-C(14B)  | 177.27(16)  | C(13B)-N(2B)-C(2B)-C(3B)    | -119.22(17) |
| C(2B)-N(2B)-C(19B)-C(18B)  | -0.1(3)     | C(13B)-N(2B)-C(19B)-C(14B)  | 1.37(18)    |
| C(2B)-C(1B)-C(5B)-C(4B)    | 16.76(19)   | C(13B)-N(2B)-C(19B)-C(18B)  | -176.04(19) |
| C(2B)-C(1B)-C(5B)-C(6B)    | -161.90(16) | C(14B)-N(1B)-C(13B)-N(2B)   | 1.9(2)      |
| C(2B)-C(1B)-C(7B)-C(8B)    | -71.03(17)  | C(14B)-N(1B)-C(13B)-C(12B)  | -172.13(17) |
| C(2B)-C(1B)-C(7B)-C(11B)   | 168.59(13)  | C(14B)-C(15B)-C(16B)-C(17B) | 0.3(3)      |
| C(2B)-C(1B)-C(7B)-C(12B)   | 50.59(18)   | C(15B)-C(14B)-C(19B)-N(2B)  | -178.76(16) |
| C(2B)-C(3B)-C(4B)-C(5B)    | -14.3(2)    | C(15B)-C(14B)-C(19B)-C(18B) | -1.0(3)     |
| C(3B)-C(4B)-C(5B)-C(1B)    | -2.0(2)     | C(15B)-C(16B)-C(17B)-C(18B) | -0.8(3)     |
| C(3B)-C(4B)-C(5B)-C(6B)    | 176.59(17)  | C(16B)-C(17B)-C(18B)-C(19B) | 0.5(3)      |
| C(5B)-C(1B)-C(2B)-O(2B)    | 89.34(15)   | C(17B)-C(18B)-C(19B)-N(2B)  | 177.47(18)  |
| C(5B)-C(1B)-C(2B)-N(2B)    | -145.14(14) | C(17B)-C(18B)-C(19B)-C(14B) | 0.4(3)      |
| C(5B)-C(1B)-C(2B)-C(3B)    | -23.32(16)  | C(19B)-N(2B)-C(2B)-O(2B)    | -51.9(2)    |
| C(5B)-C(1B)-C(7B)-C(8B)    | 43.78(19)   | C(19B)-N(2B)-C(2B)-C(1B)    | -177.71(15) |
| C(5B)-C(1B)-C(7B)-C(11B)   | -76.60(18)  | C(19B)-N(2B)-C(2B)-C(3B)    | 65.6(2)     |
| C(5B)-C(1B)-C(7B)-C(12B)   | 165.40(14)  | C(19B)-N(2B)-C(13B)-N(1B)   | -2.1(2)     |
| C(7B)-C(1B)-C(2B)-O(2B)    | -148.16(13) | C(19B)-N(2B)-C(13B)-C(12B)  | 172.41(15)  |
| C(7B)-C(1B)-C(2B)-N(2B)    | -22.6(2)    | C(19B)-C(14B)-C(15B)-C(16B) | 0.6(3)      |

**Table S23.** Hydrogen bonds for **4c** [Å and °].

| D-H...A               | d(D-H)  | d(H...A) | d(D...A)   | <(DHA) |
|-----------------------|---------|----------|------------|--------|
| O(1A)-H(1A)...O(3A)#1 | 0.84(3) | 2.02(3)  | 2.8592(19) | 171(3) |
| O(2A)-H(2A)...N(1B)   | 0.91(3) | 1.87(3)  | 2.7677(19) | 167(3) |
| O(1B)-H(1B)...O(3B)#2 | 0.85(3) | 2.00(3)  | 2.8507(19) | 172(2) |
| O(2B)-H(2B)...N(1A)#3 | 0.85(3) | 1.95(3)  | 2.7864(19) | 169(3) |

Symmetry transformations used to generate equivalent atoms:

#1 -x+1,y-1/2,-z+1 #2 -x+1,y-1/2,-z #3 x,y-1,z

#### 6.4. Compound **10b**

X-ray diffraction data were collected at 100K on a Rigaku Synergy S diffractometer equipped with a HyPix6000HE area-detector (kappa geometry, shutterless  $\omega$ -scan technique), using monochromatized Cu K $\alpha$ -radiation. The intensity data were integrated and corrected for absorption and decay by the CrysAlisPro program.<sup>1</sup> The structure was solved by direct methods using SHELXT<sup>2</sup> and refined on  $F^2$  using SHELXL-2018<sup>3</sup> in the OLEX2 program.<sup>4</sup> Positions of all atoms were found from the electron density-difference map. Atoms were refined with individual anisotropic (non-hydrogen atoms) or isotropic (hydrogen atoms) displacement parameters.

**Table S24.** Crystal data and structure refinement for **10b**.

|                      |                                                               |                  |
|----------------------|---------------------------------------------------------------|------------------|
| Identification code  | <b>10b</b>                                                    |                  |
| Empirical formula    | C <sub>21</sub> H <sub>22</sub> N <sub>2</sub> O <sub>5</sub> |                  |
| Formula weight       | 382.40                                                        |                  |
| Temperature          | 100.00(10) K                                                  |                  |
| Wavelength           | 1.54184 Å                                                     |                  |
| Crystal system       | Monoclinic                                                    |                  |
| Space group          | P 1 21/c 1                                                    |                  |
| Unit cell dimensions | a = 8.16824(5) Å                                              | a = 90°.         |
|                      | b = 16.10854(12) Å                                            | b = 91.7049(6)°. |
|                      | c = 13.62304(8) Å                                             | g = 90°.         |
| Volume               | 1791.71(2) Å <sup>3</sup>                                     |                  |
| Z                    | 4                                                             |                  |

|                                   |                                             |
|-----------------------------------|---------------------------------------------|
| Density (calculated)              | 1.418 g/cm <sup>3</sup>                     |
| Absorption coefficient            | 0.841 mm <sup>-1</sup>                      |
| F(000)                            | 808                                         |
| Crystal size                      | 0.690 x 0.371 x 0.138 mm <sup>3</sup>       |
| Theta range for data collection   | 4.251 to 79.526°.                           |
| Index ranges                      | -10<=h<=10, -20<=k<=20, -14<=l<=17          |
| Reflections collected             | 21964                                       |
| Independent reflections           | 3879 [R(int) = 0.0305]                      |
| Observed reflections              | 3770                                        |
| Completeness to theta = 67.684°   | 100.0 %                                     |
| Absorption correction             | Analytical                                  |
| Max. and min. transmission        | 0.921 and 0.724                             |
| Refinement method                 | Full-matrix least-squares on F <sup>2</sup> |
| Data / restraints / parameters    | 3879 / 0 / 342                              |
| Goodness-of-fit on F <sup>2</sup> | 1.048                                       |
| Final R indices [I>2sigma(I)]     | R1 = 0.0359, wR2 = 0.0922                   |
| R indices (all data)              | R1 = 0.0368, wR2 = 0.0929                   |
| Extinction coefficient            | 0.0023(3)                                   |
| Largest diff. peak and hole       | 0.389 and -0.286 e.Å <sup>-3</sup>          |
| CCDC                              | <b>2233471</b>                              |

**Table S25.** Atomic coordinates (x 10<sup>4</sup>) and equivalent isotropic displacement parameters (Å<sup>2</sup> x 10<sup>3</sup>) for **10b**. U(eq) is defined as one third of the trace of the orthogonalized U<sup>ij</sup> tensor.

|      | x       | y       | z       | U(eq) |
|------|---------|---------|---------|-------|
| O(1) | 6863(1) | 5711(1) | 8997(1) | 20(1) |
| O(2) | 9290(1) | 5087(1) | 8820(1) | 38(1) |
| O(3) | 6559(1) | 4058(1) | 9956(1) | 20(1) |
| O(4) | 4059(1) | 3093(1) | 8917(1) | 16(1) |
| O(5) | 9850(1) | 2462(1) | 7680(1) | 22(1) |
| N(1) | 4197(1) | 2928(1) | 5486(1) | 16(1) |
| N(2) | 4126(1) | 3871(1) | 6697(1) | 14(1) |
| C(1) | 6103(1) | 5013(1) | 8611(1) | 16(1) |
| C(2) | 6066(1) | 4208(1) | 9128(1) | 15(1) |
| C(3) | 5185(1) | 3588(1) | 8429(1) | 13(1) |



|       |         |         |         |       |
|-------|---------|---------|---------|-------|
| C(4)  | 4217(1) | 4192(1) | 7710(1) | 13(1) |
| C(5)  | 5170(1) | 4996(1) | 7795(1) | 15(1) |
| C(6)  | 8537(1) | 5671(1) | 9104(1) | 19(1) |
| C(7)  | 9198(2) | 6436(1) | 9588(1) | 20(1) |
| C(8)  | 6443(1) | 3023(1) | 7882(1) | 14(1) |
| C(9)  | 7785(1) | 3531(1) | 7384(1) | 15(1) |
| C(10) | 9079(1) | 2973(1) | 6947(1) | 19(1) |
| C(11) | 8676(1) | 1937(1) | 8128(1) | 20(1) |
| C(12) | 7315(1) | 2427(1) | 8613(1) | 17(1) |
| C(13) | 5405(1) | 2521(1) | 7125(1) | 15(1) |
| C(14) | 4569(1) | 3090(1) | 6412(1) | 14(1) |
| C(15) | 3419(1) | 3645(1) | 5133(1) | 15(1) |
| C(16) | 2705(1) | 3804(1) | 4207(1) | 17(1) |
| C(17) | 2001(1) | 4579(1) | 4051(1) | 19(1) |
| C(18) | 2010(1) | 5182(1) | 4794(1) | 19(1) |
| C(19) | 2696(1) | 5029(1) | 5719(1) | 18(1) |
| C(20) | 3380(1) | 4246(1) | 5878(1) | 14(1) |
| C(21) | 2472(1) | 4341(1) | 8059(1) | 16(1) |

---

**Table S26.** Bond lengths [ $\text{\AA}$ ] and angles [ $^\circ$ ] for **10b**.

|            |            |            |            |
|------------|------------|------------|------------|
| O(1)-C(1)  | 1.3811(13) | C(1)-C(5)  | 1.3289(16) |
| O(1)-C(6)  | 1.3724(14) | C(2)-C(3)  | 1.5438(14) |
| O(2)-C(6)  | 1.1941(16) | C(3)-C(4)  | 1.5760(14) |
| O(3)-C(2)  | 1.2102(14) | C(3)-C(8)  | 1.5757(14) |
| O(4)-H(4)  | 0.89(2)    | C(4)-C(5)  | 1.5137(14) |
| O(4)-C(3)  | 1.3999(13) | C(4)-C(21) | 1.5352(14) |
| O(5)-C(10) | 1.4263(14) | C(5)-H(5)  | 0.950(16)  |
| O(5)-C(11) | 1.4286(14) | C(6)-C(7)  | 1.4918(16) |
| N(1)-C(14) | 1.3140(14) | C(7)-H(7A) | 0.962(19)  |
| N(1)-C(15) | 1.3960(14) | C(7)-H(7B) | 0.98(2)    |
| N(2)-C(4)  | 1.4737(13) | C(7)-H(7C) | 0.95(2)    |
| N(2)-C(14) | 1.3688(14) | C(8)-C(9)  | 1.5411(14) |
| N(2)-C(20) | 1.3921(13) | C(8)-C(12) | 1.5433(14) |
| C(1)-C(2)  | 1.4774(16) | C(8)-C(13) | 1.5439(14) |

|                  |            |                   |            |
|------------------|------------|-------------------|------------|
| C(9)-H(9A)       | 0.977(15)  | O(4)-C(3)-C(4)    | 108.77(8)  |
| C(9)-H(9B)       | 0.978(16)  | O(4)-C(3)-C(8)    | 110.06(8)  |
| C(9)-C(10)       | 1.5224(15) | C(2)-C(3)-C(4)    | 101.55(8)  |
| C(10)-H(10A)     | 1.006(16)  | C(2)-C(3)-C(8)    | 111.52(8)  |
| C(10)-H(10B)     | 1.008(16)  | C(8)-C(3)-C(4)    | 112.60(8)  |
| C(11)-H(11A)     | 0.975(16)  | N(2)-C(4)-C(3)    | 112.07(8)  |
| C(11)-H(11B)     | 1.016(15)  | N(2)-C(4)-C(5)    | 112.51(9)  |
| C(11)-C(12)      | 1.5296(16) | N(2)-C(4)-C(21)   | 108.89(8)  |
| C(12)-H(12A)     | 0.992(15)  | C(5)-C(4)-C(3)    | 103.48(8)  |
| C(12)-H(12B)     | 0.998(15)  | C(5)-C(4)-C(21)   | 108.82(9)  |
| C(13)-H(13A)     | 1.001(16)  | C(21)-C(4)-C(3)   | 110.97(8)  |
| C(13)-H(13B)     | 0.981(17)  | C(1)-C(5)-C(4)    | 111.28(10) |
| C(13)-C(14)      | 1.4870(14) | C(1)-C(5)-H(5)    | 126.5(9)   |
| C(15)-C(16)      | 1.3983(15) | C(4)-C(5)-H(5)    | 121.8(9)   |
| C(15)-C(20)      | 1.4030(15) | O(1)-C(6)-C(7)    | 110.76(10) |
| C(16)-H(16)      | 0.944(16)  | O(2)-C(6)-O(1)    | 121.57(11) |
| C(16)-C(17)      | 1.3873(16) | O(2)-C(6)-C(7)    | 127.67(11) |
| C(17)-H(17)      | 0.953(15)  | C(6)-C(7)-H(7A)   | 109.5(11)  |
| C(17)-C(18)      | 1.4033(17) | C(6)-C(7)-H(7B)   | 107.9(12)  |
| C(18)-H(18)      | 0.988(16)  | C(6)-C(7)-H(7C)   | 109.2(12)  |
| C(18)-C(19)      | 1.3855(16) | H(7A)-C(7)-H(7B)  | 108.8(16)  |
| C(19)-H(19)      | 0.968(16)  | H(7A)-C(7)-H(7C)  | 111.4(15)  |
| C(19)-C(20)      | 1.3951(15) | H(7B)-C(7)-H(7C)  | 109.9(16)  |
| C(21)-H(21A)     | 0.968(15)  | C(9)-C(8)-C(3)    | 112.59(9)  |
| C(21)-H(21B)     | 0.962(16)  | C(9)-C(8)-C(12)   | 107.06(8)  |
| C(21)-H(21C)     | 0.953(16)  | C(9)-C(8)-C(13)   | 111.63(9)  |
| C(6)-O(1)-C(1)   | 115.94(9)  | C(12)-C(8)-C(3)   | 110.38(8)  |
| C(3)-O(4)-H(4)   | 114.4(12)  | C(12)-C(8)-C(13)  | 109.79(9)  |
| C(10)-O(5)-C(11) | 110.65(8)  | C(13)-C(8)-C(3)   | 105.42(8)  |
| C(14)-N(1)-C(15) | 104.90(9)  | C(8)-C(9)-H(9A)   | 108.3(9)   |
| C(14)-N(2)-C(4)  | 125.56(9)  | C(8)-C(9)-H(9B)   | 111.3(9)   |
| C(14)-N(2)-C(20) | 106.51(9)  | H(9A)-C(9)-H(9B)  | 108.7(12)  |
| C(20)-N(2)-C(4)  | 127.38(9)  | C(10)-C(9)-C(8)   | 111.70(9)  |
| O(1)-C(1)-C(2)   | 123.29(10) | C(10)-C(9)-H(9A)  | 108.4(9)   |
| C(5)-C(1)-O(1)   | 125.15(10) | C(10)-C(9)-H(9B)  | 108.4(9)   |
| C(5)-C(1)-C(2)   | 111.17(10) | O(5)-C(10)-C(9)   | 111.35(9)  |
| O(3)-C(2)-C(1)   | 127.52(10) | O(5)-C(10)-H(10A) | 108.6(9)   |
| O(3)-C(2)-C(3)   | 125.60(10) | O(5)-C(10)-H(10B) | 106.9(9)   |
| C(1)-C(2)-C(3)   | 106.80(9)  | C(9)-C(10)-H(10A) | 113.3(9)   |
| O(4)-C(3)-C(2)   | 112.08(8)  | C(9)-C(10)-H(10B) | 109.0(9)   |

|                     |            |                     |            |
|---------------------|------------|---------------------|------------|
| H(10A)-C(10)-H(10B) | 107.5(12)  | N(1)-C(15)-C(20)    | 109.91(9)  |
| O(5)-C(11)-H(11A)   | 105.6(9)   | C(16)-C(15)-C(20)   | 120.58(10) |
| O(5)-C(11)-H(11B)   | 109.0(8)   | C(15)-C(16)-H(16)   | 121.0(10)  |
| O(5)-C(11)-C(12)    | 112.65(9)  | C(17)-C(16)-C(15)   | 117.59(10) |
| H(11A)-C(11)-H(11B) | 109.1(12)  | C(17)-C(16)-H(16)   | 121.4(10)  |
| C(12)-C(11)-H(11A)  | 109.7(9)   | C(16)-C(17)-H(17)   | 118.9(9)   |
| C(12)-C(11)-H(11B)  | 110.6(8)   | C(16)-C(17)-C(18)   | 121.25(10) |
| C(8)-C(12)-H(12A)   | 109.7(9)   | C(18)-C(17)-H(17)   | 119.9(9)   |
| C(8)-C(12)-H(12B)   | 110.3(9)   | C(17)-C(18)-H(18)   | 119.8(9)   |
| C(11)-C(12)-C(8)    | 111.68(9)  | C(19)-C(18)-C(17)   | 121.76(11) |
| C(11)-C(12)-H(12A)  | 110.2(9)   | C(19)-C(18)-H(18)   | 118.4(9)   |
| C(11)-C(12)-H(12B)  | 109.2(9)   | C(18)-C(19)-H(19)   | 121.9(9)   |
| H(12A)-C(12)-H(12B) | 105.6(12)  | C(18)-C(19)-C(20)   | 116.86(10) |
| C(8)-C(13)-H(13A)   | 107.6(9)   | C(20)-C(19)-H(19)   | 121.2(9)   |
| C(8)-C(13)-H(13B)   | 113.5(9)   | N(2)-C(20)-C(15)    | 105.19(9)  |
| H(13A)-C(13)-H(13B) | 109.9(13)  | N(2)-C(20)-C(19)    | 132.90(10) |
| C(14)-C(13)-C(8)    | 110.19(9)  | C(19)-C(20)-C(15)   | 121.91(10) |
| C(14)-C(13)-H(13A)  | 108.6(9)   | C(4)-C(21)-H(21A)   | 108.4(8)   |
| C(14)-C(13)-H(13B)  | 107.0(9)   | C(4)-C(21)-H(21B)   | 109.7(9)   |
| N(1)-C(14)-N(2)     | 113.47(9)  | C(4)-C(21)-H(21C)   | 109.0(9)   |
| N(1)-C(14)-C(13)    | 126.42(10) | H(21A)-C(21)-H(21B) | 109.5(12)  |
| N(2)-C(14)-C(13)    | 120.11(9)  | H(21A)-C(21)-H(21C) | 110.8(13)  |
| N(1)-C(15)-C(16)    | 129.49(10) | H(21B)-C(21)-H(21C) | 109.4(13)  |

---

**Table S27.** Anisotropic displacement parameters ( $\text{\AA}^2 \times 10^3$ ) for **10b**. The anisotropic displacement factor exponent takes the form:  $-2p^2[h^2 a^*2U^{11} + \dots + 2 h k a^* b^* U^{12}]$

|       | U <sup>11</sup> | U <sup>22</sup> | U <sup>33</sup> | U <sup>23</sup> | U <sup>13</sup> | U <sup>12</sup> |
|-------|-----------------|-----------------|-----------------|-----------------|-----------------|-----------------|
| O(1)  | 15(1)           | 16(1)           | 28(1)           | -8(1)           | -1(1)           | -2(1)           |
| O(2)  | 17(1)           | 37(1)           | 60(1)           | -26(1)          | 2(1)            | 1(1)            |
| O(3)  | 19(1)           | 27(1)           | 14(1)           | -2(1)           | -2(1)           | -1(1)           |
| O(4)  | 15(1)           | 20(1)           | 13(1)           | 4(1)            | -1(1)           | -3(1)           |
| O(5)  | 16(1)           | 21(1)           | 28(1)           | 4(1)            | 0(1)            | 3(1)            |
| N(1)  | 17(1)           | 15(1)           | 14(1)           | -1(1)           | -2(1)           | 1(1)            |
| N(2)  | 17(1)           | 13(1)           | 11(1)           | 0(1)            | -1(1)           | 2(1)            |
| C(1)  | 14(1)           | 15(1)           | 19(1)           | -5(1)           | 3(1)            | -2(1)           |
| C(2)  | 11(1)           | 19(1)           | 14(1)           | -4(1)           | 2(1)            | 0(1)            |
| C(3)  | 13(1)           | 15(1)           | 11(1)           | 1(1)            | 0(1)            | -1(1)           |
| C(4)  | 15(1)           | 13(1)           | 11(1)           | -1(1)           | 0(1)            | 0(1)            |
| C(5)  | 16(1)           | 13(1)           | 17(1)           | -1(1)           | 3(1)            | 1(1)            |
| C(6)  | 16(1)           | 22(1)           | 19(1)           | -3(1)           | 2(1)            | -2(1)           |
| C(7)  | 18(1)           | 20(1)           | 22(1)           | -2(1)           | 1(1)            | -6(1)           |
| C(8)  | 14(1)           | 13(1)           | 13(1)           | 0(1)            | -1(1)           | 1(1)            |
| C(9)  | 16(1)           | 14(1)           | 15(1)           | 0(1)            | 1(1)            | 0(1)            |
| C(10) | 18(1)           | 18(1)           | 20(1)           | 0(1)            | 2(1)            | 2(1)            |
| C(11) | 18(1)           | 17(1)           | 24(1)           | 3(1)            | -2(1)           | 2(1)            |
| C(12) | 17(1)           | 16(1)           | 16(1)           | 3(1)            | -3(1)           | 1(1)            |
| C(13) | 17(1)           | 12(1)           | 14(1)           | 0(1)            | -2(1)           | 1(1)            |
| C(14) | 14(1)           | 13(1)           | 14(1)           | -1(1)           | -1(1)           | 0(1)            |
| C(15) | 15(1)           | 16(1)           | 14(1)           | 0(1)            | 1(1)            | 0(1)            |
| C(16) | 18(1)           | 20(1)           | 13(1)           | -1(1)           | -1(1)           | -1(1)           |
| C(17) | 18(1)           | 24(1)           | 14(1)           | 4(1)            | -2(1)           | 1(1)            |
| C(18) | 20(1)           | 18(1)           | 19(1)           | 4(1)            | 1(1)            | 3(1)            |
| C(19) | 21(1)           | 15(1)           | 16(1)           | 0(1)            | 1(1)            | 3(1)            |
| C(20) | 15(1)           | 16(1)           | 12(1)           | 1(1)            | 1(1)            | 0(1)            |
| C(21) | 15(1)           | 19(1)           | 15(1)           | 0(1)            | 1(1)            | 1(1)            |

**Table S28.** Hydrogen coordinates ( $\times 10^4$ ) and isotropic displacement parameters ( $\text{\AA}^2 \times 10^3$ ) for **10b**.

|        | x         | y        | z         | U(eq) |
|--------|-----------|----------|-----------|-------|
| H(4)   | 4420(20)  | 2906(12) | 9498(14)  | 39(5) |
| H(5)   | 4996(19)  | 5439(10) | 7345(11)  | 23(4) |
| H(7A)  | 10370(20) | 6400(11) | 9649(13)  | 35(4) |
| H(7B)  | 8910(20)  | 6911(13) | 9167(15)  | 45(5) |
| H(7C)  | 8720(20)  | 6499(12) | 10210(15) | 44(5) |
| H(9A)  | 8318(18)  | 3886(9)  | 7880(11)  | 18(3) |
| H(9B)  | 7321(19)  | 3883(10) | 6861(11)  | 21(4) |
| H(10A) | 8635(19)  | 2607(10) | 6404(11)  | 21(4) |
| H(10B) | 9962(19)  | 3330(10) | 6665(11)  | 23(4) |
| H(11A) | 9290(19)  | 1619(10) | 8624(11)  | 23(4) |
| H(11B) | 8198(18)  | 1542(9)  | 7614(11)  | 19(3) |
| H(12A) | 6505(18)  | 2042(9)  | 8893(11)  | 19(3) |
| H(12B) | 7790(18)  | 2743(10) | 9184(11)  | 20(3) |
| H(13A) | 4552(19)  | 2214(10) | 7493(11)  | 22(4) |
| H(13B) | 6050(20)  | 2130(10) | 6742(12)  | 25(4) |
| H(16)  | 2714(19)  | 3400(10) | 3705(12)  | 23(4) |
| H(17)  | 1519(18)  | 4702(10) | 3422(11)  | 20(4) |
| H(18)  | 1515(19)  | 5732(10) | 4663(11)  | 24(4) |
| H(19)  | 2682(19)  | 5440(10) | 6237(12)  | 23(4) |
| H(21A) | 2541(17)  | 4557(9)  | 8722(11)  | 15(3) |
| H(21B) | 1924(18)  | 4738(10) | 7636(11)  | 20(3) |
| H(21C) | 1885(19)  | 3829(10) | 8038(11)  | 22(4) |

**Table S29.** Torsion angles [°] for **10b**.

|                        |             |                         |             |
|------------------------|-------------|-------------------------|-------------|
| O(1)-C(1)-C(2)-O(3)    | 5.87(17)    | C(4)-C(3)-C(8)-C(12)    | -178.25(8)  |
| O(1)-C(1)-C(2)-C(3)    | -177.09(9)  | C(4)-C(3)-C(8)-C(13)    | -59.75(11)  |
| O(1)-C(1)-C(5)-C(4)    | -166.65(9)  | C(5)-C(1)-C(2)-O(3)     | -167.27(11) |
| O(3)-C(2)-C(3)-O(4)    | 40.84(14)   | C(5)-C(1)-C(2)-C(3)     | 9.76(12)    |
| O(3)-C(2)-C(3)-C(4)    | 156.78(10)  | C(6)-O(1)-C(1)-C(2)     | 66.65(14)   |
| O(3)-C(2)-C(3)-C(8)    | -83.07(13)  | C(6)-O(1)-C(1)-C(5)     | -121.18(12) |
| O(4)-C(3)-C(4)-N(2)    | -97.13(10)  | C(8)-C(3)-C(4)-N(2)     | 25.14(12)   |
| O(4)-C(3)-C(4)-C(5)    | 141.40(8)   | C(8)-C(3)-C(4)-C(5)     | -96.33(10)  |
| O(4)-C(3)-C(4)-C(21)   | 24.85(11)   | C(8)-C(3)-C(4)-C(21)    | 147.12(9)   |
| O(4)-C(3)-C(8)-C(9)    | -176.28(8)  | C(8)-C(9)-C(10)-O(5)    | -59.15(12)  |
| O(4)-C(3)-C(8)-C(12)   | -56.71(11)  | C(8)-C(13)-C(14)-N(1)   | 148.79(11)  |
| O(4)-C(3)-C(8)-C(13)   | 61.79(10)   | C(8)-C(13)-C(14)-N(2)   | -30.40(13)  |
| O(5)-C(11)-C(12)-C(8)  | 55.68(12)   | C(9)-C(8)-C(12)-C(11)   | -50.89(12)  |
| N(1)-C(15)-C(16)-C(17) | 179.75(11)  | C(9)-C(8)-C(13)-C(14)   | -61.05(11)  |
| N(1)-C(15)-C(20)-N(2)  | -1.07(12)   | C(10)-O(5)-C(11)-C(12)  | -59.18(12)  |
| N(1)-C(15)-C(20)-C(19) | 178.87(10)  | C(11)-O(5)-C(10)-C(9)   | 60.54(12)   |
| N(2)-C(4)-C(5)-C(1)    | -140.43(9)  | C(12)-C(8)-C(9)-C(10)   | 52.90(11)   |
| C(1)-O(1)-C(6)-O(2)    | 4.63(17)    | C(12)-C(8)-C(13)-C(14)  | -179.61(9)  |
| C(1)-O(1)-C(6)-C(7)    | -176.14(10) | C(13)-C(8)-C(9)-C(10)   | -67.27(11)  |
| C(1)-C(2)-C(3)-O(4)    | -136.26(9)  | C(13)-C(8)-C(12)-C(11)  | 70.46(11)   |
| C(1)-C(2)-C(3)-C(4)    | -20.33(10)  | C(14)-N(1)-C(15)-C(16)  | -176.95(11) |
| C(1)-C(2)-C(3)-C(8)    | 99.83(10)   | C(14)-N(1)-C(15)-C(20)  | 1.48(12)    |
| C(2)-C(1)-C(5)-C(4)    | 6.34(13)    | C(14)-N(2)-C(4)-C(3)    | 10.27(14)   |
| C(2)-C(3)-C(4)-N(2)    | 144.53(8)   | C(14)-N(2)-C(4)-C(5)    | 126.40(11)  |
| C(2)-C(3)-C(4)-C(5)    | 23.06(10)   | C(14)-N(2)-C(4)-C(21)   | -112.88(11) |
| C(2)-C(3)-C(4)-C(21)   | -93.50(9)   | C(14)-N(2)-C(20)-C(15)  | 0.26(11)    |
| C(2)-C(3)-C(8)-C(9)    | -51.23(11)  | C(14)-N(2)-C(20)-C(19)  | -179.68(12) |
| C(2)-C(3)-C(8)-C(12)   | 68.34(11)   | C(15)-N(1)-C(14)-N(2)   | -1.35(12)   |
| C(2)-C(3)-C(8)-C(13)   | -173.17(8)  | C(15)-N(1)-C(14)-C(13)  | 179.42(10)  |
| C(3)-C(4)-C(5)-C(1)    | -19.25(11)  | C(15)-C(16)-C(17)-C(18) | 0.26(17)    |
| C(3)-C(8)-C(9)-C(10)   | 174.38(9)   | C(16)-C(15)-C(20)-N(2)  | 177.51(10)  |
| C(3)-C(8)-C(12)-C(11)  | -173.76(9)  | C(16)-C(15)-C(20)-C(19) | -2.54(16)   |
| C(3)-C(8)-C(13)-C(14)  | 61.50(11)   | C(16)-C(17)-C(18)-C(19) | -1.04(18)   |
| C(4)-N(2)-C(14)-N(1)   | 172.71(9)   | C(17)-C(18)-C(19)-C(20) | 0.04(17)    |
| C(4)-N(2)-C(14)-C(13)  | -8.00(16)   | C(18)-C(19)-C(20)-N(2)  | -178.34(11) |
| C(4)-N(2)-C(20)-C(15)  | -171.55(10) | C(18)-C(19)-C(20)-C(15) | 1.72(16)    |
| C(4)-N(2)-C(20)-C(19)  | 8.51(19)    | C(20)-N(2)-C(4)-C(3)    | -179.40(9)  |
| C(4)-C(3)-C(8)-C(9)    | 62.18(11)   | C(20)-N(2)-C(4)-C(5)    | -63.27(13)  |

|                        |           |                         |           |
|------------------------|-----------|-------------------------|-----------|
| C(20)-N(2)-C(4)-C(21)  | 57.45(13) | C(20)-C(15)-C(16)-C(17) | 1.47(16)  |
| C(20)-N(2)-C(14)-N(1)  | 0.71(12)  | C(21)-C(4)-C(5)-C(1)    | 98.81(10) |
| C(20)-N(2)-C(14)-C(13) | 179.99(9) |                         |           |

**Table S30.** Hydrogen bonds for **10b** [Å and °].

| D-H...A            | d(D-H)  | d(H...A) | d(D...A)   | <(DHA)    |
|--------------------|---------|----------|------------|-----------|
| O(4)-H(4)...N(1)#1 | 0.89(2) | 1.91(2)  | 2.6978(12) | 146.0(17) |

Symmetry transformations used to generate equivalent atoms: #1 x,-y+1/2,z+1/2

## 6.5. Compound **11a**

X-ray diffraction data were collected at 100K on a Rigaku Synergy S diffractometer equipped with a HyPix600HE area-detector (kappa geometry, shutterless  $\omega$ -scan technique), using monochromatized Cu  $K_{\alpha}$ -radiation. The intensity data were integrated and corrected for absorption and decay by the CrysAlisPro program.<sup>1</sup> The structure was solved by direct methods using SHELXT<sup>2</sup> and refined on  $F^2$  using SHELXL-2018<sup>3</sup> in the OLEX2 program.<sup>4</sup> Positions of all atoms were found from the electron density-difference map. Atoms were refined with individual anisotropic (non-hydrogen atoms) or isotropic (hydrogen atoms) displacement parameters.

**Table S31.** Crystal data and structure refinement for **11a**.

|                      |                                                               |                               |  |
|----------------------|---------------------------------------------------------------|-------------------------------|--|
| Identification code  | <b>11a</b>                                                    |                               |  |
| Empirical formula    | C <sub>28</sub> H <sub>34</sub> N <sub>4</sub> O <sub>3</sub> |                               |  |
| Formula weight       | 474.59                                                        |                               |  |
| Temperature          | 100.0(1) K                                                    |                               |  |
| Wavelength           | 1.54184 Å                                                     |                               |  |
| Crystal system       | Monoclinic                                                    |                               |  |
| Space group          | P2 <sub>1</sub> /c                                            |                               |  |
| Unit cell dimensions | a = 8.48626(8) Å                                              | $\alpha = 90^\circ$ .         |  |
|                      | b = 24.4487(2) Å                                              | $\beta = 102.1288(8)^\circ$ . |  |

|                                   |                                             |                       |
|-----------------------------------|---------------------------------------------|-----------------------|
|                                   | $c = 12.18602(9) \text{ \AA}$               | $\gamma = 90^\circ$ . |
| Volume                            | 2471.89(4) $\text{\AA}^3$                   |                       |
| Z                                 | 4                                           |                       |
| Density (calculated)              | 1.275 $\text{g/cm}^3$                       |                       |
| Absorption coefficient            | 0.670 $\text{mm}^{-1}$                      |                       |
| F(000)                            | 1016                                        |                       |
| Crystal size                      | 0.46 x 0.06 x 0.05 $\text{mm}^3$            |                       |
| Theta range for data collection   | 3.616 to 79.523°.                           |                       |
| Index ranges                      | -10<=h<=10, -31<=k<=30, -13<=l<=15          |                       |
| Reflections collected             | 31875                                       |                       |
| Independent reflections           | 5343 [R(int) = 0.0324]                      |                       |
| Observed reflections              | 5026                                        |                       |
| Completeness to theta = 67.684°   | 99.9 %                                      |                       |
| Absorption correction             | Analytical                                  |                       |
| Max. and min. transmission        | 0.969 and 0.844                             |                       |
| Refinement method                 | Full-matrix least-squares on F <sup>2</sup> |                       |
| Data / restraints / parameters    | 5343 / 0 / 453                              |                       |
| Goodness-of-fit on F <sup>2</sup> | 1.076                                       |                       |
| Final R indices [I>2sigma(I)]     | R1 = 0.0399, wR2 = 0.1035                   |                       |
| R indices (all data)              | R1 = 0.0416, wR2 = 0.1048                   |                       |
| Extinction coefficient            | 0.00118(19)                                 |                       |
| Largest diff. peak and hole       | 0.340 and -0.242 $\text{e.\AA}^{-3}$        |                       |
| CCDC                              | <b>2233463</b>                              |                       |

**Table S32.** Atomic coordinates ( $\times 10^4$ ) and equivalent isotropic displacement parameters ( $\text{\AA}^2 \times 10^3$ ) for **11a**. U(eq) is defined as one third of the trace of the orthogonalized  $U^{ij}$  tensor.

|      | x       | y       | z       | U(eq) |
|------|---------|---------|---------|-------|
| O(1) | 4111(1) | 3947(1) | 5508(1) | 23(1) |
| O(2) | 5468(1) | 2935(1) | 4921(1) | 24(1) |
| N(1) | 5656(1) | 2118(1) | 6627(1) | 20(1) |
| N(2) | 5737(1) | 1775(1) | 7487(1) | 21(1) |
| N(3) | 2337(1) | 3617(1) | 7515(1) | 19(1) |
| N(4) | -175(1) | 3951(1) | 7272(1) | 22(1) |
| C(1) | 3695(1) | 3440(1) | 5909(1) | 19(1) |
| C(2) | 4838(1) | 2974(1) | 5732(1) | 20(1) |



|       |         |         |          |       |
|-------|---------|---------|----------|-------|
| C(3)  | 5013(1) | 2595(1) | 6687(1)  | 20(1) |
| C(4)  | 4245(1) | 2827(1) | 7591(1)  | 21(1) |
| C(5)  | 3844(1) | 3429(1) | 7223(1)  | 19(1) |
| C(6)  | 985(1)  | 3791(1) | 6777(1)  | 20(1) |
| C(7)  | 895(1)  | 3789(1) | 5543(1)  | 22(1) |
| C(8)  | 1928(1) | 3322(1) | 5223(1)  | 20(1) |
| C(9)  | 6325(1) | 1241(1) | 7415(1)  | 21(1) |
| C(10) | 6472(2) | 904(1)  | 8353(1)  | 27(1) |
| C(11) | 7044(2) | 376(1)  | 8310(1)  | 34(1) |
| C(12) | 7452(2) | 176(1)  | 7338(1)  | 33(1) |
| C(13) | 7294(2) | 515(1)  | 6407(1)  | 28(1) |
| C(14) | 6745(2) | 1047(1) | 6437(1)  | 24(1) |
| C(15) | 5226(1) | 3799(1) | 7796(1)  | 24(1) |
| C(16) | 2019(1) | 3675(1) | 8587(1)  | 20(1) |
| C(17) | 2910(1) | 3557(1) | 9659(1)  | 22(1) |
| C(18) | 2189(2) | 3676(1) | 10553(1) | 24(1) |
| C(19) | 637(2)  | 3897(1) | 10392(1) | 26(1) |
| C(20) | -261(2) | 4001(1) | 9324(1)  | 24(1) |
| C(21) | 451(1)  | 3888(1) | 8416(1)  | 21(1) |
| C(22) | 1259(1) | 2764(1) | 5493(1)  | 22(1) |
| C(23) | -379(2) | 2624(1) | 4738(1)  | 27(1) |
| C(24) | -292(2) | 2645(1) | 3500(1)  | 29(1) |
| C(25) | 301(2)  | 3203(1) | 3204(1)  | 27(1) |
| C(26) | 1932(1) | 3346(1) | 3955(1)  | 23(1) |
| O(3)  | 7049(1) | 4409(1) | 6083(1)  | 25(1) |
| C(27) | 7207(2) | 4986(1) | 6242(1)  | 33(1) |
| C(28) | 7408(2) | 5159(1) | 7453(1)  | 37(1) |

**Table S33.** Bond lengths [Å] and angles [°] for **11a**.

|           |            |            |            |
|-----------|------------|------------|------------|
| O(1)-H(1) | 0.92(2)    | N(3)-C(6)  | 1.3682(14) |
| O(1)-C(1) | 1.4047(13) | N(3)-C(16) | 1.3948(14) |
| O(2)-C(2) | 1.2218(14) | N(4)-C(6)  | 1.3172(15) |
| N(1)-N(2) | 1.3340(13) | N(4)-C(21) | 1.3924(14) |
| N(1)-C(3) | 1.2955(15) | C(1)-C(2)  | 1.5410(15) |
| N(2)-H(2) | 0.912(17)  | C(1)-C(5)  | 1.5797(15) |
| N(2)-C(9) | 1.4053(15) | C(1)-C(8)  | 1.5821(15) |
| N(3)-C(5) | 1.4726(14) | C(2)-C(3)  | 1.4698(15) |

|              |            |                 |            |
|--------------|------------|-----------------|------------|
| C(3)-C(4)    | 1.5041(15) | C(23)-C(24)     | 1.5266(18) |
| C(4)-H(4A)   | 1.008(16)  | C(24)-H(24A)    | 1.003(18)  |
| C(4)-H(4B)   | 0.991(16)  | C(24)-H(24B)    | 1.017(16)  |
| C(4)-C(5)    | 1.5541(15) | C(24)-C(25)     | 1.5223(19) |
| C(5)-C(15)   | 1.5288(16) | C(25)-H(25A)    | 1.005(18)  |
| C(6)-C(7)    | 1.4890(15) | C(25)-H(25B)    | 0.984(17)  |
| C(7)-H(7A)   | 0.990(16)  | C(25)-C(26)     | 1.5313(17) |
| C(7)-H(7B)   | 0.997(16)  | C(26)-H(26A)    | 1.009(16)  |
| C(7)-C(8)    | 1.5386(15) | C(26)-H(26B)    | 0.995(16)  |
| C(8)-C(22)   | 1.5413(16) | O(3)-H(3)       | 0.92(2)    |
| C(8)-C(26)   | 1.5465(15) | O(3)-C(27)      | 1.4251(16) |
| C(9)-C(10)   | 1.3940(16) | C(27)-H(27A)    | 0.995(19)  |
| C(9)-C(14)   | 1.3963(16) | C(27)-H(27B)    | 1.01(2)    |
| C(10)-H(10)  | 0.956(17)  | C(27)-C(28)     | 1.5102(19) |
| C(10)-C(11)  | 1.3846(19) | C(28)-H(28A)    | 1.01(2)    |
| C(11)-H(11)  | 0.986(19)  | C(28)-H(28B)    | 1.04(2)    |
| C(11)-C(12)  | 1.3896(19) | C(28)-H(28C)    | 1.01(2)    |
| C(12)-H(12)  | 0.971(17)  | C(1)-O(1)-H(1)  | 112.2(12)  |
| C(12)-C(13)  | 1.3874(19) | C(3)-N(1)-N(2)  | 118.41(10) |
| C(13)-H(13)  | 0.979(17)  | N(1)-N(2)-H(2)  | 122.0(10)  |
| C(13)-C(14)  | 1.3861(18) | N(1)-N(2)-C(9)  | 119.73(9)  |
| C(14)-H(14)  | 0.979(17)  | C(9)-N(2)-H(2)  | 118.2(10)  |
| C(15)-H(15A) | 1.001(18)  | C(6)-N(3)-C(5)  | 126.05(9)  |
| C(15)-H(15B) | 0.969(17)  | C(6)-N(3)-C(16) | 106.53(9)  |
| C(15)-H(15C) | 0.994(16)  | C(16)-N(3)-C(5) | 127.38(9)  |
| C(16)-C(17)  | 1.3958(16) | C(6)-N(4)-C(21) | 105.17(9)  |
| C(16)-C(21)  | 1.4029(16) | O(1)-C(1)-C(2)  | 113.14(9)  |
| C(17)-H(17)  | 0.967(15)  | O(1)-C(1)-C(5)  | 113.26(9)  |
| C(17)-C(18)  | 1.3878(16) | O(1)-C(1)-C(8)  | 104.87(9)  |
| C(18)-H(18)  | 0.999(16)  | C(2)-C(1)-C(5)  | 102.14(8)  |
| C(18)-C(19)  | 1.3985(18) | C(2)-C(1)-C(8)  | 110.26(9)  |
| C(19)-H(19)  | 0.983(16)  | C(5)-C(1)-C(8)  | 113.42(9)  |
| C(19)-C(20)  | 1.3876(17) | O(2)-C(2)-C(1)  | 124.41(10) |
| C(20)-H(20)  | 1.001(16)  | O(2)-C(2)-C(3)  | 127.13(11) |
| C(20)-C(21)  | 1.3949(16) | C(3)-C(2)-C(1)  | 108.45(9)  |
| C(22)-H(22A) | 1.004(15)  | N(1)-C(3)-C(2)  | 119.69(10) |
| C(22)-H(22B) | 0.991(16)  | N(1)-C(3)-C(4)  | 129.28(10) |
| C(22)-C(23)  | 1.5357(16) | C(2)-C(3)-C(4)  | 110.83(10) |
| C(23)-H(23A) | 0.995(17)  | C(3)-C(4)-H(4A) | 112.6(9)   |
| C(23)-H(23B) | 0.981(17)  | C(3)-C(4)-H(4B) | 109.7(9)   |

|                   |            |                     |            |
|-------------------|------------|---------------------|------------|
| C(3)-C(4)-C(5)    | 104.32(9)  | C(9)-C(14)-H(14)    | 119.7(10)  |
| H(4A)-C(4)-H(4B)  | 108.1(13)  | C(13)-C(14)-C(9)    | 119.31(11) |
| C(5)-C(4)-H(4A)   | 110.6(9)   | C(13)-C(14)-H(14)   | 121.0(10)  |
| C(5)-C(4)-H(4B)   | 111.6(9)   | C(5)-C(15)-H(15A)   | 110.1(10)  |
| N(3)-C(5)-C(1)    | 110.58(9)  | C(5)-C(15)-H(15B)   | 111.4(10)  |
| N(3)-C(5)-C(4)    | 112.00(9)  | C(5)-C(15)-H(15C)   | 109.6(9)   |
| N(3)-C(5)-C(15)   | 109.03(9)  | H(15A)-C(15)-H(15B) | 109.2(13)  |
| C(4)-C(5)-C(1)    | 105.98(9)  | H(15A)-C(15)-H(15C) | 108.4(13)  |
| C(15)-C(5)-C(1)   | 110.07(9)  | H(15B)-C(15)-H(15C) | 108.1(13)  |
| C(15)-C(5)-C(4)   | 109.14(9)  | N(3)-C(16)-C(17)    | 133.01(11) |
| N(3)-C(6)-C(7)    | 121.45(10) | N(3)-C(16)-C(21)    | 105.21(10) |
| N(4)-C(6)-N(3)    | 113.21(10) | C(17)-C(16)-C(21)   | 121.77(10) |
| N(4)-C(6)-C(7)    | 125.34(10) | C(16)-C(17)-H(17)   | 123.3(9)   |
| C(6)-C(7)-H(7A)   | 107.9(9)   | C(18)-C(17)-C(16)   | 116.70(11) |
| C(6)-C(7)-H(7B)   | 107.7(9)   | C(18)-C(17)-H(17)   | 119.9(9)   |
| C(6)-C(7)-C(8)    | 110.31(9)  | C(17)-C(18)-H(18)   | 117.6(9)   |
| H(7A)-C(7)-H(7B)  | 107.6(12)  | C(17)-C(18)-C(19)   | 121.94(11) |
| C(8)-C(7)-H(7A)   | 110.2(9)   | C(19)-C(18)-H(18)   | 120.5(9)   |
| C(8)-C(7)-H(7B)   | 112.9(9)   | C(18)-C(19)-H(19)   | 119.1(9)   |
| C(7)-C(8)-C(1)    | 105.00(9)  | C(20)-C(19)-C(18)   | 121.18(11) |
| C(7)-C(8)-C(22)   | 110.35(9)  | C(20)-C(19)-H(19)   | 119.7(9)   |
| C(7)-C(8)-C(26)   | 110.27(9)  | C(19)-C(20)-H(20)   | 121.6(9)   |
| C(22)-C(8)-C(1)   | 113.53(9)  | C(19)-C(20)-C(21)   | 117.62(11) |
| C(22)-C(8)-C(26)  | 108.95(9)  | C(21)-C(20)-H(20)   | 120.8(9)   |
| C(26)-C(8)-C(1)   | 108.67(9)  | N(4)-C(21)-C(16)    | 109.86(10) |
| C(10)-C(9)-N(2)   | 118.01(10) | N(4)-C(21)-C(20)    | 129.39(11) |
| C(10)-C(9)-C(14)  | 120.21(11) | C(20)-C(21)-C(16)   | 120.75(11) |
| C(14)-C(9)-N(2)   | 121.77(10) | C(8)-C(22)-H(22A)   | 111.7(8)   |
| C(9)-C(10)-H(10)  | 119.0(10)  | C(8)-C(22)-H(22B)   | 109.0(9)   |
| C(11)-C(10)-C(9)  | 119.55(12) | H(22A)-C(22)-H(22B) | 107.1(12)  |
| C(11)-C(10)-H(10) | 121.5(10)  | C(23)-C(22)-C(8)    | 113.39(10) |
| C(10)-C(11)-H(11) | 119.2(11)  | C(23)-C(22)-H(22A)  | 107.5(9)   |
| C(10)-C(11)-C(12) | 120.73(12) | C(23)-C(22)-H(22B)  | 108.0(9)   |
| C(12)-C(11)-H(11) | 120.1(11)  | C(22)-C(23)-H(23A)  | 111.2(10)  |
| C(11)-C(12)-H(12) | 119.8(10)  | C(22)-C(23)-H(23B)  | 109.0(10)  |
| C(13)-C(12)-C(11) | 119.30(12) | H(23A)-C(23)-H(23B) | 108.6(14)  |
| C(13)-C(12)-H(12) | 120.9(10)  | C(24)-C(23)-C(22)   | 111.06(10) |
| C(12)-C(13)-H(13) | 120.2(10)  | C(24)-C(23)-H(23A)  | 107.9(10)  |
| C(14)-C(13)-C(12) | 120.89(12) | C(24)-C(23)-H(23B)  | 109.0(10)  |
| C(14)-C(13)-H(13) | 118.9(10)  | C(23)-C(24)-H(24A)  | 110.1(10)  |

|                     |            |                     |            |
|---------------------|------------|---------------------|------------|
| C(23)-C(24)-H(24B)  | 109.4(9)   | C(25)-C(26)-H(26B)  | 110.9(9)   |
| H(24A)-C(24)-H(24B) | 106.6(13)  | H(26A)-C(26)-H(26B) | 107.4(13)  |
| C(25)-C(24)-C(23)   | 110.56(10) | C(27)-O(3)-H(3)     | 107.4(13)  |
| C(25)-C(24)-H(24A)  | 111.1(10)  | O(3)-C(27)-H(27A)   | 104.8(11)  |
| C(25)-C(24)-H(24B)  | 109.0(9)   | O(3)-C(27)-H(27B)   | 110.3(11)  |
| C(24)-C(25)-H(25A)  | 110.0(10)  | O(3)-C(27)-C(28)    | 113.45(11) |
| C(24)-C(25)-H(25B)  | 110.0(10)  | H(27A)-C(27)-H(27B) | 108.5(15)  |
| C(24)-C(25)-C(26)   | 111.48(10) | C(28)-C(27)-H(27A)  | 110.9(10)  |
| H(25A)-C(25)-H(25B) | 104.5(13)  | C(28)-C(27)-H(27B)  | 108.7(12)  |
| C(26)-C(25)-H(25A)  | 111.2(10)  | C(27)-C(28)-H(28A)  | 108.0(11)  |
| C(26)-C(25)-H(25B)  | 109.5(10)  | C(27)-C(28)-H(28B)  | 110.6(12)  |
| C(8)-C(26)-H(26A)   | 108.1(9)   | C(27)-C(28)-H(28C)  | 109.5(11)  |
| C(8)-C(26)-H(26B)   | 108.0(9)   | H(28A)-C(28)-H(28B) | 108.4(16)  |
| C(25)-C(26)-C(8)    | 113.38(10) | H(28A)-C(28)-H(28C) | 107.8(16)  |
| C(25)-C(26)-H(26A)  | 108.8(9)   | H(28B)-C(28)-H(28C) | 112.5(16)  |

**Table S34.** Anisotropic displacement parameters ( $\text{\AA}^2 \times 10^3$ ) for C6BNIMNH2NH2. The anisotropic displacement factor exponent takes the form:  $-2\pi^2[h^2 a^{*2}U^{11} + \dots + 2 h k a^* b^* U^{12}]$

|       | U <sup>11</sup> | U <sup>22</sup> | U <sup>33</sup> | U <sup>23</sup> | U <sup>13</sup> | U <sup>12</sup> |
|-------|-----------------|-----------------|-----------------|-----------------|-----------------|-----------------|
| O(1)  | 24(1)           | 22(1)           | 22(1)           | 4(1)            | 4(1)            | -1(1)           |
| O(2)  | 24(1)           | 31(1)           | 19(1)           | 2(1)            | 7(1)            | 3(1)            |
| N(1)  | 19(1)           | 22(1)           | 18(1)           | 1(1)            | 2(1)            | 0(1)            |
| N(2)  | 24(1)           | 22(1)           | 17(1)           | 1(1)            | 5(1)            | 2(1)            |
| N(3)  | 20(1)           | 21(1)           | 17(1)           | 0(1)            | 4(1)            | 3(1)            |
| N(4)  | 22(1)           | 24(1)           | 19(1)           | -1(1)           | 4(1)            | 3(1)            |
| C(1)  | 21(1)           | 20(1)           | 17(1)           | 1(1)            | 4(1)            | 0(1)            |
| C(2)  | 18(1)           | 24(1)           | 18(1)           | 0(1)            | 2(1)            | -1(1)           |
| C(3)  | 19(1)           | 23(1)           | 18(1)           | 1(1)            | 3(1)            | 2(1)            |
| C(4)  | 22(1)           | 22(1)           | 18(1)           | 2(1)            | 5(1)            | 3(1)            |
| C(5)  | 18(1)           | 22(1)           | 18(1)           | 1(1)            | 4(1)            | 2(1)            |
| C(6)  | 22(1)           | 20(1)           | 20(1)           | 0(1)            | 3(1)            | 1(1)            |
| C(7)  | 22(1)           | 23(1)           | 18(1)           | 0(1)            | 3(1)            | 4(1)            |
| C(8)  | 20(1)           | 22(1)           | 17(1)           | 0(1)            | 3(1)            | 2(1)            |
| C(9)  | 18(1)           | 22(1)           | 22(1)           | 1(1)            | 3(1)            | 0(1)            |
| C(10) | 34(1)           | 26(1)           | 24(1)           | 3(1)            | 11(1)           | 2(1)            |

|       |       |       |       |       |       |       |
|-------|-------|-------|-------|-------|-------|-------|
| C(11) | 46(1) | 28(1) | 33(1) | 10(1) | 16(1) | 6(1)  |
| C(12) | 40(1) | 21(1) | 40(1) | 4(1)  | 16(1) | 6(1)  |
| C(13) | 32(1) | 27(1) | 30(1) | -2(1) | 13(1) | 1(1)  |
| C(14) | 26(1) | 25(1) | 22(1) | 2(1)  | 6(1)  | 2(1)  |
| C(15) | 23(1) | 28(1) | 20(1) | 0(1)  | 4(1)  | -2(1) |
| C(16) | 22(1) | 20(1) | 19(1) | -1(1) | 6(1)  | 0(1)  |
| C(17) | 22(1) | 23(1) | 20(1) | 1(1)  | 4(1)  | 1(1)  |
| C(18) | 28(1) | 26(1) | 18(1) | 0(1)  | 4(1)  | 1(1)  |
| C(19) | 28(1) | 30(1) | 20(1) | -1(1) | 8(1)  | 2(1)  |
| C(20) | 23(1) | 28(1) | 23(1) | -1(1) | 7(1)  | 3(1)  |
| C(21) | 23(1) | 21(1) | 19(1) | -1(1) | 4(1)  | 1(1)  |
| C(22) | 22(1) | 23(1) | 21(1) | -1(1) | 3(1)  | 0(1)  |
| C(23) | 23(1) | 29(1) | 29(1) | -1(1) | 2(1)  | -1(1) |
| C(24) | 26(1) | 33(1) | 26(1) | -6(1) | -2(1) | 2(1)  |
| C(25) | 27(1) | 34(1) | 18(1) | -1(1) | 1(1)  | 6(1)  |
| C(26) | 24(1) | 28(1) | 17(1) | 1(1)  | 4(1)  | 4(1)  |
| O(3)  | 23(1) | 24(1) | 25(1) | 1(1)  | 2(1)  | 0(1)  |
| C(27) | 45(1) | 24(1) | 28(1) | 4(1)  | 4(1)  | 0(1)  |
| C(28) | 53(1) | 26(1) | 30(1) | -2(1) | 2(1)  | 0(1)  |

**Table S35.** Hydrogen coordinates ( $\times 10^4$ ) and isotropic displacement parameters ( $\text{\AA}^2 \times 10^{-3}$ ) for **11a**.

|        | x        | y       | z        | U(eq) |
|--------|----------|---------|----------|-------|
| H(1)   | 5170(20) | 4037(8) | 5791(16) | 47(5) |
| H(2)   | 5484(19) | 1881(7) | 8146(14) | 30(4) |
| H(4A)  | 4984(19) | 2815(6) | 8356(14) | 29(4) |
| H(4B)  | 3259(19) | 2617(6) | 7627(13) | 26(4) |
| H(7A)  | 1295(18) | 4147(7) | 5335(13) | 26(4) |
| H(7B)  | -264(19) | 3760(6) | 5164(13) | 25(4) |
| H(10)  | 6190(20) | 1045(7) | 9016(15) | 35(4) |
| H(11)  | 7140(20) | 139(8)  | 8976(16) | 43(5) |
| H(12)  | 7850(20) | -195(7) | 7320(14) | 35(4) |
| H(13)  | 7580(20) | 380(7)  | 5717(14) | 33(4) |
| H(14)  | 6650(20) | 1289(7) | 5787(14) | 31(4) |
| H(15A) | 6260(20) | 3675(7) | 7609(14) | 34(4) |
| H(15B) | 5031(19) | 4177(7) | 7567(13) | 28(4) |

|        |           |         |           |       |
|--------|-----------|---------|-----------|-------|
| H(15C) | 5337(19)  | 3780(7) | 8623(14)  | 29(4) |
| H(17)  | 3969(18)  | 3391(6) | 9797(12)  | 21(3) |
| H(18)  | 2817(19)  | 3597(6) | 11326(14) | 28(4) |
| H(19)  | 178(19)   | 3977(6) | 11051(13) | 28(4) |
| H(20)  | -1380(20) | 4150(7) | 9202(13)  | 30(4) |
| H(22A) | 1129(18)  | 2744(6) | 6292(13)  | 22(3) |
| H(22B) | 2034(18)  | 2473(6) | 5396(13)  | 25(4) |
| H(23A) | -1230(20) | 2885(7) | 4857(14)  | 33(4) |
| H(23B) | -690(20)  | 2254(7) | 4918(14)  | 32(4) |
| H(24A) | -1370(20) | 2558(7) | 3017(15)  | 38(4) |
| H(24B) | 482(19)   | 2353(7) | 3340(13)  | 27(4) |
| H(25A) | -530(20)  | 3490(7) | 3253(14)  | 35(4) |
| H(25B) | 390(20)   | 3208(7) | 2413(14)  | 33(4) |
| H(26A) | 2767(19)  | 3079(7) | 3801(13)  | 28(4) |
| H(26B) | 2284(19)  | 3719(7) | 3783(13)  | 27(4) |
| H(3)   | 7980(30)  | 4250(8) | 6479(17)  | 52(5) |
| H(27A) | 6200(20)  | 5141(7) | 5776(15)  | 42(5) |
| H(27B) | 8150(20)  | 5126(8) | 5945(17)  | 51(5) |
| H(28A) | 7480(20)  | 5569(8) | 7482(16)  | 47(5) |
| H(28B) | 6410(30)  | 5037(9) | 7773(18)  | 59(6) |
| H(28C) | 8450(20)  | 5009(8) | 7902(17)  | 50(5) |

**Table S36.** Torsion angles [°] for **11a**.

|                      |             |                        |             |
|----------------------|-------------|------------------------|-------------|
| O(1)-C(1)-C(2)-O(2)  | -35.27(15)  | N(2)-N(1)-C(3)-C(4)    | -2.93(18)   |
| O(1)-C(1)-C(2)-C(3)  | 145.13(9)   | N(2)-C(9)-C(10)-C(11)  | 179.88(12)  |
| O(1)-C(1)-C(5)-N(3)  | 87.56(11)   | N(2)-C(9)-C(14)-C(13)  | -178.98(11) |
| O(1)-C(1)-C(5)-C(4)  | -150.86(9)  | N(3)-C(6)-C(7)-C(8)    | 30.70(15)   |
| O(1)-C(1)-C(5)-C(15) | -32.96(13)  | N(3)-C(16)-C(17)-C(18) | 179.51(12)  |
| O(1)-C(1)-C(8)-C(7)  | -62.25(10)  | N(3)-C(16)-C(21)-N(4)  | 0.77(13)    |
| O(1)-C(1)-C(8)-C(22) | 177.13(9)   | N(3)-C(16)-C(21)-C(20) | -179.59(11) |
| O(1)-C(1)-C(8)-C(26) | 55.73(11)   | N(4)-C(6)-C(7)-C(8)    | -149.00(11) |
| O(2)-C(2)-C(3)-N(1)  | -12.99(18)  | C(1)-C(2)-C(3)-N(1)    | 166.59(10)  |
| O(2)-C(2)-C(3)-C(4)  | 171.71(11)  | C(1)-C(2)-C(3)-C(4)    | -8.70(12)   |
| N(1)-N(2)-C(9)-C(10) | 176.65(11)  | C(1)-C(8)-C(22)-C(23)  | -173.82(9)  |
| N(1)-N(2)-C(9)-C(14) | -3.71(16)   | C(1)-C(8)-C(26)-C(25)  | 176.40(10)  |
| N(1)-C(3)-C(4)-C(5)  | 175.31(11)  | C(2)-C(1)-C(5)-N(3)    | -150.43(9)  |
| N(2)-N(1)-C(3)-C(2)  | -177.24(10) | C(2)-C(1)-C(5)-C(4)    | -28.85(11)  |

|                       |             |                         |             |
|-----------------------|-------------|-------------------------|-------------|
| C(2)-C(1)-C(5)-C(15)  | 89.04(10)   | C(8)-C(1)-C(2)-C(3)     | -97.80(10)  |
| C(2)-C(1)-C(8)-C(7)   | 175.65(9)   | C(8)-C(1)-C(5)-N(3)     | -31.81(12)  |
| C(2)-C(1)-C(8)-C(22)  | 55.03(12)   | C(8)-C(1)-C(5)-C(4)     | 89.77(11)   |
| C(2)-C(1)-C(8)-C(26)  | -66.37(11)  | C(8)-C(1)-C(5)-C(15)    | -152.33(9)  |
| C(2)-C(3)-C(4)-C(5)   | -9.97(12)   | C(8)-C(22)-C(23)-C(24)  | 55.88(14)   |
| C(3)-N(1)-N(2)-C(9)   | 175.58(10)  | C(9)-C(10)-C(11)-C(12)  | -0.8(2)     |
| C(3)-C(4)-C(5)-N(3)   | 144.91(9)   | C(10)-C(9)-C(14)-C(13)  | 0.65(18)    |
| C(3)-C(4)-C(5)-C(1)   | 24.25(11)   | C(10)-C(11)-C(12)-C(13) | 0.5(2)      |
| C(3)-C(4)-C(5)-C(15)  | -94.26(10)  | C(11)-C(12)-C(13)-C(14) | 0.4(2)      |
| C(5)-N(3)-C(6)-N(4)   | -178.31(10) | C(12)-C(13)-C(14)-C(9)  | -1.0(2)     |
| C(5)-N(3)-C(6)-C(7)   | 1.95(17)    | C(14)-C(9)-C(10)-C(11)  | 0.24(19)    |
| C(5)-N(3)-C(16)-C(17) | -3.8(2)     | C(16)-N(3)-C(5)-C(1)    | -178.54(10) |
| C(5)-N(3)-C(16)-C(21) | 177.58(10)  | C(16)-N(3)-C(5)-C(4)    | 63.51(14)   |
| C(5)-C(1)-C(2)-O(2)   | -157.35(11) | C(16)-N(3)-C(5)-C(15)   | -57.39(14)  |
| C(5)-C(1)-C(2)-C(3)   | 23.05(11)   | C(16)-N(3)-C(6)-N(4)    | -0.51(13)   |
| C(5)-C(1)-C(8)-C(7)   | 61.82(11)   | C(16)-N(3)-C(6)-C(7)    | 179.75(10)  |
| C(5)-C(1)-C(8)-C(22)  | -58.81(12)  | C(16)-C(17)-C(18)-C(19) | 0.92(18)    |
| C(5)-C(1)-C(8)-C(26)  | 179.79(9)   | C(17)-C(16)-C(21)-N(4)  | -178.06(11) |
| C(6)-N(3)-C(5)-C(1)   | -1.19(15)   | C(17)-C(16)-C(21)-C(20) | 1.58(18)    |
| C(6)-N(3)-C(5)-C(4)   | -119.15(12) | C(17)-C(18)-C(19)-C(20) | 0.7(2)      |
| C(6)-N(3)-C(5)-C(15)  | 119.96(12)  | C(18)-C(19)-C(20)-C(21) | -1.20(19)   |
| C(6)-N(3)-C(16)-C(17) | 178.46(13)  | C(19)-C(20)-C(21)-N(4)  | 179.65(12)  |
| C(6)-N(3)-C(16)-C(21) | -0.18(12)   | C(19)-C(20)-C(21)-C(16) | 0.09(18)    |
| C(6)-N(4)-C(21)-C(16) | -1.07(13)   | C(21)-N(4)-C(6)-N(3)    | 0.97(13)    |
| C(6)-N(4)-C(21)-C(20) | 179.34(12)  | C(21)-N(4)-C(6)-C(7)    | -179.30(11) |
| C(6)-C(7)-C(8)-C(1)   | -59.04(12)  | C(21)-C(16)-C(17)-C(18) | -2.04(17)   |
| C(6)-C(7)-C(8)-C(22)  | 63.66(12)   | C(22)-C(8)-C(26)-C(25)  | 52.24(13)   |
| C(6)-C(7)-C(8)-C(26)  | -175.93(9)  | C(22)-C(23)-C(24)-C(25) | -56.16(14)  |
| C(7)-C(8)-C(22)-C(23) | 68.62(12)   | C(23)-C(24)-C(25)-C(26) | 56.08(14)   |
| C(7)-C(8)-C(26)-C(25) | -69.01(13)  | C(24)-C(25)-C(26)-C(8)  | -55.38(14)  |
| C(8)-C(1)-C(2)-O(2)   | 81.80(13)   | C(26)-C(8)-C(22)-C(23)  | -52.58(12)  |

---

**Table S37.** Hydrogen bonds for **11a** [Å and °].

| D-H...A            | d(D-H)    | d(H...A)  | d(D...A)   | <(DHA)    |
|--------------------|-----------|-----------|------------|-----------|
| O(1)-H(1)...O(3)   | 0.92(2)   | 1.81(2)   | 2.6920(12) | 161.4(18) |
| N(2)-H(2)...O(2)#1 | 0.912(17) | 2.212(17) | 3.1041(12) | 166.0(14) |
| O(3)-H(3)...N(4)#2 | 0.92(2)   | 1.81(2)   | 2.7332(13) | 179(2)    |

Symmetry transformations used to generate equivalent atoms: #1  $x, -y+1/2, z+1/2$  #2  $x+1, y, z$

## 6.6. Compound **12b**

X-ray diffraction data were collected at 100K on a Rigaku Synergy S diffractometer equipped with a HyPix600HE area-detector (kappa geometry, shutterless  $\omega$ -scan technique), using monochromatized Cu  $K_{\alpha}$ -radiation. The intensity data were integrated and corrected for absorption and decay by the CrysAlisPro program.<sup>1</sup> The structure was solved by direct methods using SHELXT<sup>2</sup> and refined on  $F^2$  using SHELXL-2018<sup>3</sup> in the OLEX2 program.<sup>4</sup> Positions of all atoms were found from the electron density-difference map. Atoms were refined with individual anisotropic (non-hydrogen atoms) or isotropic (hydrogen atoms) displacement parameters. The position of hydroxy atom H1 was restrained at the distance of 0.85(2)Å from O1, and  $U_{iso}(H1)=1.5 U_{eq}(O1)$ .

**Table S38.** Crystal data and structure refinement for **12b**.

|                      |                                                               |                                |
|----------------------|---------------------------------------------------------------|--------------------------------|
| Identification code  | <b>12b</b>                                                    |                                |
| Empirical formula    | C <sub>25</sub> H <sub>24</sub> N <sub>4</sub> O <sub>2</sub> |                                |
| Formula weight       | 412.48                                                        |                                |
| Temperature          | 100.0(1) K                                                    |                                |
| Wavelength           | 1.54184 Å                                                     |                                |
| Crystal system       | Monoclinic                                                    |                                |
| Space group          | I2/a                                                          |                                |
| Unit cell dimensions | $a = 18.1847(2)$ Å                                            | $\alpha = 90^\circ$ .          |
|                      | $b = 9.88774(11)$ Å                                           | $\beta = 106.5529(13)^\circ$ . |
|                      | $c = 27.3603(4)$ Å                                            | $\gamma = 90^\circ$ .          |
| Volume               | $4715.65(11)$ Å <sup>3</sup>                                  |                                |
| Z                    | 8                                                             |                                |



|                                   |                                             |
|-----------------------------------|---------------------------------------------|
| Density (calculated)              | 1.162 g/cm <sup>3</sup>                     |
| Absorption coefficient            | 0.604 mm <sup>-1</sup>                      |
| F(000)                            | 1744                                        |
| Crystal size                      | 0.28 x 0.18 x 0.10 mm <sup>3</sup>          |
| Theta range for data collection   | 3.370 to 79.678°.                           |
| Index ranges                      | -23<=h<=17, -12<=k<=12, -34<=l<=34          |
| Reflections collected             | 32398                                       |
| Independent reflections           | 5013 [R(int) = 0.0370]                      |
| Observed reflections              | 4797                                        |
| Completeness to theta = 67.684°   | 99.7 %                                      |
| Absorption correction             | Analytical                                  |
| Max. and min. transmission        | 0.948 and 0.877                             |
| Refinement method                 | Full-matrix least-squares on F <sup>2</sup> |
| Data / restraints / parameters    | 5013 / 1 / 376                              |
| Goodness-of-fit on F <sup>2</sup> | 1.092                                       |
| Final R indices [I>2sigma(I)]     | R1 = 0.0563, wR2 = 0.1405                   |
| R indices (all data)              | R1 = 0.0577, wR2 = 0.1413                   |
| Extinction coefficient            | 0.00065(6)                                  |
| Largest diff. peak and hole       | 0.498 and -0.213 e.Å <sup>-3</sup>          |
| CCDC                              | <b>2233468</b>                              |

**Table S39.** Atomic coordinates (x 10<sup>4</sup>) and equivalent isotropic displacement parameters (Å<sup>2</sup>x 10<sup>3</sup>) for **12b**.

U(eq) is defined as one third of the trace of the orthogonalized U<sup>ij</sup> tensor.

|      | x       | y       | z       | U(eq) |
|------|---------|---------|---------|-------|
| O(1) | 4289(1) | 8374(1) | 6371(1) | 37(1) |
| O(2) | 2424(1) | 5092(1) | 6782(1) | 32(1) |
| N(1) | 5041(1) | 7003(2) | 8099(1) | 32(1) |
| N(2) | 5363(1) | 6701(2) | 7374(1) | 29(1) |
| N(3) | 4997(1) | 4177(2) | 5804(1) | 28(1) |
| N(4) | 3826(1) | 6193(2) | 5593(1) | 32(1) |
| C(1) | 4416(1) | 6991(2) | 6492(1) | 28(1) |
| C(2) | 3814(1) | 6604(2) | 6782(1) | 27(1) |
| C(3) | 4035(1) | 7440(2) | 7277(1) | 30(1) |
| C(4) | 4810(1) | 7061(2) | 7598(1) | 29(1) |
| C(5) | 5281(1) | 6713(2) | 6823(1) | 29(1) |
| C(6) | 5501(1) | 5306(2) | 6649(1) | 30(1) |

|       |         |         |         |       |
|-------|---------|---------|---------|-------|
| C(7)  | 4954(1) | 5121(2) | 6131(1) | 26(1) |
| C(8)  | 4357(1) | 6103(2) | 6030(1) | 27(1) |
| C(9)  | 5806(1) | 7814(2) | 6715(1) | 37(1) |
| C(10) | 5808(1) | 6604(2) | 8218(1) | 31(1) |
| C(11) | 6342(1) | 6431(2) | 8694(1) | 36(1) |
| C(12) | 7075(1) | 6020(2) | 8707(1) | 38(1) |
| C(13) | 7269(1) | 5769(2) | 8255(1) | 36(1) |
| C(14) | 6751(1) | 5946(2) | 7778(1) | 33(1) |
| C(15) | 6019(1) | 6386(2) | 7769(1) | 30(1) |
| C(16) | 4430(1) | 4188(2) | 5354(1) | 30(1) |
| C(17) | 4396(1) | 3147(2) | 4996(1) | 34(1) |
| C(18) | 3818(1) | 3124(3) | 4548(1) | 43(1) |
| C(19) | 3270(1) | 4174(3) | 4427(1) | 48(1) |
| C(20) | 3296(1) | 5205(3) | 4764(1) | 46(1) |
| C(21) | 3856(1) | 5219(2) | 5240(1) | 32(1) |
| C(22) | 3004(1) | 6994(2) | 6458(1) | 30(1) |
| C(23) | 2388(1) | 6517(2) | 6696(1) | 33(1) |
| C(24) | 3152(1) | 4704(2) | 7114(1) | 30(1) |
| C(25) | 3807(1) | 5075(2) | 6894(1) | 27(1) |

**Table S40.** Bond lengths [Å] and angles [°] for **12b**.

|            |           |             |          |
|------------|-----------|-------------|----------|
| O(1)-H(1)  | 0.884(17) | C(2)-C(3)   | 1.540(3) |
| O(1)-C(1)  | 1.411(2)  | C(2)-C(22)  | 1.537(3) |
| O(2)-C(23) | 1.426(2)  | C(2)-C(25)  | 1.544(2) |
| O(2)-C(24) | 1.428(2)  | C(3)-H(3A)  | 1.01(2)  |
| N(1)-C(4)  | 1.314(3)  | C(3)-H(3B)  | 0.99(2)  |
| N(1)-C(10) | 1.395(3)  | C(3)-C(4)   | 1.482(3) |
| N(2)-C(4)  | 1.368(2)  | C(5)-C(6)   | 1.559(3) |
| N(2)-C(5)  | 1.472(3)  | C(5)-C(9)   | 1.530(3) |
| N(2)-C(15) | 1.398(3)  | C(6)-H(6A)  | 1.01(3)  |
| N(3)-C(7)  | 1.311(2)  | C(6)-H(6B)  | 1.00(2)  |
| N(3)-C(16) | 1.363(2)  | C(6)-C(7)   | 1.492(3) |
| N(4)-C(8)  | 1.308(3)  | C(7)-C(8)   | 1.425(2) |
| N(4)-C(21) | 1.376(3)  | C(9)-H(9A)  | 1.03(3)  |
| C(1)-C(2)  | 1.571(3)  | C(9)-H(9B)  | 1.04(3)  |
| C(1)-C(5)  | 1.599(3)  | C(9)-H(9C)  | 1.04(3)  |
| C(1)-C(8)  | 1.519(3)  | C(10)-C(11) | 1.395(3) |

|                  |            |                  |            |
|------------------|------------|------------------|------------|
| C(10)-C(15)      | 1.406(3)   | C(2)-C(1)-C(5)   | 112.86(15) |
| C(11)-H(11)      | 0.95(3)    | C(8)-C(1)-C(2)   | 112.64(14) |
| C(11)-C(12)      | 1.385(3)   | C(8)-C(1)-C(5)   | 101.32(14) |
| C(12)-H(12)      | 1.02(3)    | C(3)-C(2)-C(1)   | 105.56(14) |
| C(12)-C(13)      | 1.401(3)   | C(3)-C(2)-C(25)  | 111.43(16) |
| C(13)-H(13)      | 1.01(2)    | C(22)-C(2)-C(1)  | 109.82(16) |
| C(13)-C(14)      | 1.386(3)   | C(22)-C(2)-C(3)  | 109.88(15) |
| C(14)-H(14)      | 0.98(3)    | C(22)-C(2)-C(25) | 107.47(14) |
| C(14)-C(15)      | 1.395(3)   | C(25)-C(2)-C(1)  | 112.68(14) |
| C(16)-C(17)      | 1.410(3)   | C(2)-C(3)-H(3A)  | 113.6(13)  |
| C(16)-C(21)      | 1.429(3)   | C(2)-C(3)-H(3B)  | 108.9(13)  |
| C(17)-H(17)      | 1.03(3)    | H(3A)-C(3)-H(3B) | 104.1(18)  |
| C(17)-C(18)      | 1.367(3)   | C(4)-C(3)-C(2)   | 110.60(15) |
| C(18)-H(18)      | 0.97(3)    | C(4)-C(3)-H(3A)  | 108.4(13)  |
| C(18)-C(19)      | 1.412(4)   | C(4)-C(3)-H(3B)  | 111.2(13)  |
| C(19)-H(19)      | 1.01(3)    | N(1)-C(4)-N(2)   | 113.57(17) |
| C(19)-C(20)      | 1.366(4)   | N(1)-C(4)-C(3)   | 126.64(18) |
| C(20)-H(20)      | 1.00(3)    | N(2)-C(4)-C(3)   | 119.78(18) |
| C(20)-C(21)      | 1.406(3)   | N(2)-C(5)-C(1)   | 112.11(15) |
| C(22)-H(22A)     | 0.98(3)    | N(2)-C(5)-C(6)   | 110.17(16) |
| C(22)-H(22B)     | 0.99(3)    | N(2)-C(5)-C(9)   | 108.38(15) |
| C(22)-C(23)      | 1.523(3)   | C(6)-C(5)-C(1)   | 106.12(14) |
| C(23)-H(23A)     | 1.03(2)    | C(9)-C(5)-C(1)   | 109.66(16) |
| C(23)-H(23B)     | 0.96(2)    | C(9)-C(5)-C(6)   | 110.41(16) |
| C(24)-H(24A)     | 1.03(2)    | C(5)-C(6)-H(6A)  | 110.4(14)  |
| C(24)-H(24B)     | 1.03(2)    | C(5)-C(6)-H(6B)  | 112.1(14)  |
| C(24)-C(25)      | 1.523(3)   | H(6A)-C(6)-H(6B) | 107.5(19)  |
| C(25)-H(25A)     | 1.00(2)    | C(7)-C(6)-C(5)   | 103.87(15) |
| C(25)-H(25B)     | 0.99(2)    | C(7)-C(6)-H(6A)  | 110.4(14)  |
| C(1)-O(1)-H(1)   | 113.0(19)  | C(7)-C(6)-H(6B)  | 112.6(13)  |
| C(23)-O(2)-C(24) | 111.19(14) | N(3)-C(7)-C(6)   | 125.64(16) |
| C(4)-N(1)-C(10)  | 104.96(16) | N(3)-C(7)-C(8)   | 122.90(17) |
| C(4)-N(2)-C(5)   | 125.85(16) | C(8)-C(7)-C(6)   | 111.45(16) |
| C(4)-N(2)-C(15)  | 106.50(16) | N(4)-C(8)-C(1)   | 125.50(16) |
| C(15)-N(2)-C(5)  | 127.59(16) | N(4)-C(8)-C(7)   | 123.20(17) |
| C(7)-N(3)-C(16)  | 115.75(16) | C(7)-C(8)-C(1)   | 111.29(16) |
| C(8)-N(4)-C(21)  | 115.32(16) | C(5)-C(9)-H(9A)  | 110.3(15)  |
| O(1)-C(1)-C(2)   | 105.32(14) | C(5)-C(9)-H(9B)  | 107.1(14)  |
| O(1)-C(1)-C(5)   | 111.63(15) | C(5)-C(9)-H(9C)  | 111.4(14)  |
| O(1)-C(1)-C(8)   | 113.32(16) | H(9A)-C(9)-H(9B) | 110(2)     |

|                   |            |                     |            |
|-------------------|------------|---------------------|------------|
| H(9A)-C(9)-H(9C)  | 110(2)     | C(20)-C(19)-H(19)   | 116.3(17)  |
| H(9B)-C(9)-H(9C)  | 108(2)     | C(19)-C(20)-H(20)   | 119.1(15)  |
| N(1)-C(10)-C(15)  | 110.00(17) | C(19)-C(20)-C(21)   | 120.7(2)   |
| C(11)-C(10)-N(1)  | 129.57(19) | C(21)-C(20)-H(20)   | 120.0(15)  |
| C(11)-C(10)-C(15) | 120.43(19) | N(4)-C(21)-C(16)    | 121.25(18) |
| C(10)-C(11)-H(11) | 119(2)     | N(4)-C(21)-C(20)    | 119.67(19) |
| C(12)-C(11)-C(10) | 117.9(2)   | C(20)-C(21)-C(16)   | 119.05(19) |
| C(12)-C(11)-H(11) | 123(2)     | C(2)-C(22)-H(22A)   | 107.2(14)  |
| C(11)-C(12)-H(12) | 119.1(14)  | C(2)-C(22)-H(22B)   | 110.5(14)  |
| C(11)-C(12)-C(13) | 120.9(2)   | H(22A)-C(22)-H(22B) | 108(2)     |
| C(13)-C(12)-H(12) | 120.0(14)  | C(23)-C(22)-C(2)    | 112.03(16) |
| C(12)-C(13)-H(13) | 118.1(13)  | C(23)-C(22)-H(22A)  | 110.8(14)  |
| C(14)-C(13)-C(12) | 122.3(2)   | C(23)-C(22)-H(22B)  | 108.4(14)  |
| C(14)-C(13)-H(13) | 119.6(13)  | O(2)-C(23)-C(22)    | 111.77(15) |
| C(13)-C(14)-H(14) | 121.3(15)  | O(2)-C(23)-H(23A)   | 109.1(13)  |
| C(13)-C(14)-C(15) | 116.5(2)   | O(2)-C(23)-H(23B)   | 105.9(14)  |
| C(15)-C(14)-H(14) | 122.2(15)  | C(22)-C(23)-H(23A)  | 111.8(13)  |
| N(2)-C(15)-C(10)  | 104.95(16) | C(22)-C(23)-H(23B)  | 108.8(14)  |
| C(14)-C(15)-N(2)  | 133.05(19) | H(23A)-C(23)-H(23B) | 109.3(19)  |
| C(14)-C(15)-C(10) | 122.01(19) | O(2)-C(24)-H(24A)   | 106.2(12)  |
| N(3)-C(16)-C(17)  | 119.64(17) | O(2)-C(24)-H(24B)   | 110.7(13)  |
| N(3)-C(16)-C(21)  | 121.37(17) | O(2)-C(24)-C(25)    | 111.80(16) |
| C(17)-C(16)-C(21) | 118.98(18) | H(24A)-C(24)-H(24B) | 109.1(18)  |
| C(16)-C(17)-H(17) | 116.1(14)  | C(25)-C(24)-H(24A)  | 109.0(12)  |
| C(18)-C(17)-C(16) | 120.4(2)   | C(25)-C(24)-H(24B)  | 109.9(13)  |
| C(18)-C(17)-H(17) | 123.5(14)  | C(2)-C(25)-H(25A)   | 109.3(13)  |
| C(17)-C(18)-H(18) | 117.7(16)  | C(2)-C(25)-H(25B)   | 111.1(14)  |
| C(17)-C(18)-C(19) | 120.6(2)   | C(24)-C(25)-C(2)    | 111.50(15) |
| C(19)-C(18)-H(18) | 121.7(16)  | C(24)-C(25)-H(25A)  | 106.6(12)  |
| C(18)-C(19)-H(19) | 123.4(17)  | C(24)-C(25)-H(25B)  | 108.1(13)  |
| C(20)-C(19)-C(18) | 120.2(2)   | H(25A)-C(25)-H(25B) | 110.3(18)  |

**Table S41.** Anisotropic displacement parameters ( $\text{\AA}^2 \times 10^3$ ) for **12b**. The anisotropic displacement factor exponent takes the form:  $-2\pi^2[h^2 a^{*2}U^{11} + \dots + 2 h k a^* b^* U^{12}]$

|      | $U^{11}$ | $U^{22}$ | $U^{33}$ | $U^{23}$ | $U^{13}$ | $U^{12}$ |
|------|----------|----------|----------|----------|----------|----------|
| O(1) | 44(1)    | 16(1)    | 55(1)    | 2(1)     | 23(1)    | 1(1)     |

|       |       |       |       |       |       |        |
|-------|-------|-------|-------|-------|-------|--------|
| O(2)  | 20(1) | 28(1) | 46(1) | 4(1)  | 7(1)  | 1(1)   |
| N(1)  | 33(1) | 23(1) | 40(1) | -4(1) | 11(1) | -4(1)  |
| N(2)  | 24(1) | 24(1) | 38(1) | -4(1) | 8(1)  | -5(1)  |
| N(3)  | 26(1) | 20(1) | 40(1) | -1(1) | 11(1) | -1(1)  |
| N(4)  | 30(1) | 28(1) | 38(1) | 4(1)  | 11(1) | 5(1)   |
| C(1)  | 28(1) | 16(1) | 41(1) | -1(1) | 11(1) | 0(1)   |
| C(2)  | 23(1) | 19(1) | 39(1) | -2(1) | 9(1)  | 0(1)   |
| C(3)  | 28(1) | 22(1) | 42(1) | -4(1) | 13(1) | 0(1)   |
| C(4)  | 26(1) | 20(1) | 42(1) | -6(1) | 11(1) | -5(1)  |
| C(5)  | 24(1) | 24(1) | 38(1) | -6(1) | 10(1) | -6(1)  |
| C(6)  | 20(1) | 28(1) | 42(1) | -5(1) | 7(1)  | -1(1)  |
| C(7)  | 24(1) | 18(1) | 38(1) | -1(1) | 10(1) | -3(1)  |
| C(8)  | 26(1) | 19(1) | 38(1) | 2(1)  | 10(1) | -1(1)  |
| C(9)  | 34(1) | 33(1) | 45(1) | -5(1) | 15(1) | -13(1) |
| C(10) | 32(1) | 20(1) | 42(1) | -3(1) | 11(1) | -8(1)  |
| C(11) | 40(1) | 27(1) | 40(1) | -1(1) | 9(1)  | -7(1)  |
| C(12) | 36(1) | 30(1) | 45(1) | 2(1)  | 3(1)  | -9(1)  |
| C(13) | 27(1) | 26(1) | 54(1) | 1(1)  | 8(1)  | -6(1)  |
| C(14) | 27(1) | 24(1) | 49(1) | -3(1) | 10(1) | -7(1)  |
| C(15) | 28(1) | 20(1) | 42(1) | -3(1) | 8(1)  | -7(1)  |
| C(16) | 28(1) | 25(1) | 36(1) | 1(1)  | 11(1) | -2(1)  |
| C(17) | 33(1) | 29(1) | 40(1) | -2(1) | 11(1) | -3(1)  |
| C(18) | 45(1) | 47(1) | 37(1) | -6(1) | 12(1) | -7(1)  |
| C(19) | 39(1) | 68(2) | 34(1) | -3(1) | 3(1)  | 2(1)   |
| C(20) | 38(1) | 58(1) | 40(1) | 4(1)  | 9(1)  | 12(1)  |
| C(21) | 31(1) | 32(1) | 36(1) | 3(1)  | 11(1) | 3(1)   |
| C(22) | 27(1) | 20(1) | 42(1) | 2(1)  | 9(1)  | 6(1)   |
| C(23) | 26(1) | 28(1) | 44(1) | 4(1)  | 9(1)  | 6(1)   |
| C(24) | 22(1) | 24(1) | 43(1) | 3(1)  | 9(1)  | 1(1)   |
| C(25) | 21(1) | 19(1) | 39(1) | 1(1)  | 7(1)  | 2(1)   |

**Table S42.** Hydrogen coordinates ( $\times 10^4$ ) and isotropic displacement parameters ( $\text{\AA}^2 \times 10^{-3}$ ) for **12b**.

|       | x        | y        | z       | U(eq) |
|-------|----------|----------|---------|-------|
| H(1)  | 4484(15) | 8640(30) | 6125(9) | 55    |
| H(3A) | 3663(13) | 7340(20) | 7488(9) | 33(6) |

|        |          |          |          |        |
|--------|----------|----------|----------|--------|
| H(3B)  | 4010(13) | 8410(20) | 7188(9)  | 31(6)  |
| H(6A)  | 5424(13) | 4570(30) | 6888(9)  | 37(6)  |
| H(6B)  | 6049(13) | 5270(20) | 6646(9)  | 34(6)  |
| H(9A)  | 6370(16) | 7570(30) | 6885(10) | 47(7)  |
| H(9B)  | 5701(13) | 7870(30) | 6321(10) | 40(6)  |
| H(9C)  | 5685(14) | 8750(30) | 6845(10) | 43(7)  |
| H(11)  | 6188(19) | 6590(30) | 8994(13) | 73(10) |
| H(12)  | 7478(14) | 5920(30) | 9050(10) | 41(6)  |
| H(13)  | 7806(13) | 5450(20) | 8282(8)  | 33(6)  |
| H(14)  | 6892(14) | 5750(30) | 7466(10) | 42(7)  |
| H(17)  | 4810(14) | 2410(30) | 5099(9)  | 42(7)  |
| H(18)  | 3806(15) | 2370(30) | 4317(10) | 47(7)  |
| H(19)  | 2864(16) | 4250(30) | 4088(11) | 56(8)  |
| H(20)  | 2878(15) | 5900(30) | 4683(9)  | 44(7)  |
| H(22A) | 2928(14) | 6590(30) | 6120(10) | 39(6)  |
| H(22B) | 2959(13) | 7990(30) | 6414(9)  | 38(6)  |
| H(23A) | 2427(13) | 7000(20) | 7034(9)  | 33(6)  |
| H(23B) | 1894(13) | 6690(20) | 6462(9)  | 32(6)  |
| H(24A) | 3134(12) | 3660(20) | 7149(8)  | 28(5)  |
| H(24B) | 3240(13) | 5140(20) | 7468(9)  | 36(6)  |
| H(25A) | 3720(12) | 4560(20) | 6569(9)  | 28(5)  |
| H(25B) | 4292(13) | 4790(20) | 7140(9)  | 32(6)  |

**Table S43.** Torsion angles [°] for **12b**.

|                        |             |                        |             |
|------------------------|-------------|------------------------|-------------|
| O(1)-C(1)-C(2)-C(3)    | -64.53(18)  | N(2)-C(5)-C(6)-C(7)    | 143.73(15)  |
| O(1)-C(1)-C(2)-C(22)   | 53.87(19)   | N(3)-C(7)-C(8)-N(4)    | -3.9(3)     |
| O(1)-C(1)-C(2)-C(25)   | 173.64(15)  | N(3)-C(7)-C(8)-C(1)    | 175.21(16)  |
| O(1)-C(1)-C(5)-N(2)    | 94.86(18)   | N(3)-C(16)-C(17)-C(18) | 178.25(19)  |
| O(1)-C(1)-C(5)-C(6)    | -144.83(16) | N(3)-C(16)-C(21)-N(4)  | -4.0(3)     |
| O(1)-C(1)-C(5)-C(9)    | -25.6(2)    | N(3)-C(16)-C(21)-C(20) | 178.20(19)  |
| O(1)-C(1)-C(8)-N(4)    | -43.7(2)    | C(1)-C(2)-C(3)-C(4)    | -62.52(19)  |
| O(1)-C(1)-C(8)-C(7)    | 137.17(16)  | C(1)-C(2)-C(22)-C(23)  | 174.37(15)  |
| O(2)-C(24)-C(25)-C(2)  | 57.2(2)     | C(1)-C(2)-C(25)-C(24)  | -172.77(16) |
| N(1)-C(10)-C(11)-C(12) | 179.84(19)  | C(1)-C(5)-C(6)-C(7)    | 22.16(19)   |
| N(1)-C(10)-C(15)-N(2)  | 1.6(2)      | C(2)-C(1)-C(5)-N(2)    | -23.5(2)    |
| N(1)-C(10)-C(15)-C(14) | -178.31(16) | C(2)-C(1)-C(5)-C(6)    | 96.77(17)   |

|                       |             |                         |             |
|-----------------------|-------------|-------------------------|-------------|
| C(2)-C(1)-C(5)-C(9)   | -143.97(16) | C(8)-C(1)-C(5)-C(6)     | -23.92(18)  |
| C(2)-C(1)-C(8)-N(4)   | 75.7(2)     | C(8)-C(1)-C(5)-C(9)     | 95.33(17)   |
| C(2)-C(1)-C(8)-C(7)   | -103.40(17) | C(9)-C(5)-C(6)-C(7)     | -96.60(18)  |
| C(2)-C(3)-C(4)-N(1)   | -144.17(18) | C(10)-N(1)-C(4)-N(2)    | 1.4(2)      |
| C(2)-C(3)-C(4)-N(2)   | 34.5(2)     | C(10)-N(1)-C(4)-C(3)    | -179.88(17) |
| C(2)-C(22)-C(23)-O(2) | -56.6(2)    | C(10)-C(11)-C(12)-C(13) | -0.8(3)     |
| C(3)-C(2)-C(22)-C(23) | -69.9(2)    | C(11)-C(10)-C(15)-N(2)  | -177.67(16) |
| C(3)-C(2)-C(25)-C(24) | 68.8(2)     | C(11)-C(10)-C(15)-C(14) | 2.4(3)      |
| C(4)-N(1)-C(10)-C(11) | 177.34(19)  | C(11)-C(12)-C(13)-C(14) | 1.5(3)      |
| C(4)-N(1)-C(10)-C(15) | -1.8(2)     | C(12)-C(13)-C(14)-C(15) | -0.2(3)     |
| C(4)-N(2)-C(5)-C(1)   | -8.6(2)     | C(13)-C(14)-C(15)-N(2)  | 178.35(18)  |
| C(4)-N(2)-C(5)-C(6)   | -126.54(18) | C(13)-C(14)-C(15)-C(10) | -1.8(3)     |
| C(4)-N(2)-C(5)-C(9)   | 112.56(19)  | C(15)-N(2)-C(4)-N(1)    | -0.4(2)     |
| C(4)-N(2)-C(15)-C(10) | -0.75(19)   | C(15)-N(2)-C(4)-C(3)    | -179.24(16) |
| C(4)-N(2)-C(15)-C(14) | 179.16(19)  | C(15)-N(2)-C(5)-C(1)    | 174.56(16)  |
| C(5)-N(2)-C(4)-N(1)   | -177.79(16) | C(15)-N(2)-C(5)-C(6)    | 56.6(2)     |
| C(5)-N(2)-C(4)-C(3)   | 3.4(3)      | C(15)-N(2)-C(5)-C(9)    | -64.3(2)    |
| C(5)-N(2)-C(15)-C(10) | 176.57(16)  | C(15)-C(10)-C(11)-C(12) | -1.0(3)     |
| C(5)-N(2)-C(15)-C(14) | -3.5(3)     | C(16)-N(3)-C(7)-C(6)    | 179.30(17)  |
| C(5)-C(1)-C(2)-C(3)   | 57.49(18)   | C(16)-N(3)-C(7)-C(8)    | 0.1(3)      |
| C(5)-C(1)-C(2)-C(22)  | 175.89(14)  | C(16)-C(17)-C(18)-C(19) | 3.1(3)      |
| C(5)-C(1)-C(2)-C(25)  | -64.3(2)    | C(17)-C(16)-C(21)-N(4)  | 174.60(18)  |
| C(5)-C(1)-C(8)-N(4)   | -163.44(17) | C(17)-C(16)-C(21)-C(20) | -3.2(3)     |
| C(5)-C(1)-C(8)-C(7)   | 17.45(19)   | C(17)-C(18)-C(19)-C(20) | -2.2(4)     |
| C(5)-C(6)-C(7)-N(3)   | 168.95(17)  | C(18)-C(19)-C(20)-C(21) | -1.5(4)     |
| C(5)-C(6)-C(7)-C(8)   | -11.8(2)    | C(19)-C(20)-C(21)-N(4)  | -173.7(2)   |
| C(6)-C(7)-C(8)-N(4)   | 176.79(17)  | C(19)-C(20)-C(21)-C(16) | 4.1(3)      |
| C(6)-C(7)-C(8)-C(1)   | -4.1(2)     | C(21)-N(4)-C(8)-C(1)    | -175.59(17) |
| C(7)-N(3)-C(16)-C(17) | -175.03(17) | C(21)-N(4)-C(8)-C(7)    | 3.4(3)      |
| C(7)-N(3)-C(16)-C(21) | 3.6(3)      | C(21)-C(16)-C(17)-C(18) | -0.4(3)     |
| C(8)-N(4)-C(21)-C(16) | 0.3(3)      | C(22)-C(2)-C(3)-C(4)    | 179.13(16)  |
| C(8)-N(4)-C(21)-C(20) | 178.10(19)  | C(22)-C(2)-C(25)-C(24)  | -51.7(2)    |
| C(8)-C(1)-C(2)-C(3)   | 171.49(15)  | C(23)-O(2)-C(24)-C(25)  | -60.1(2)    |
| C(8)-C(1)-C(2)-C(22)  | -70.11(19)  | C(24)-O(2)-C(23)-C(22)  | 59.6(2)     |
| C(8)-C(1)-C(2)-C(25)  | 49.7(2)     | C(25)-C(2)-C(3)-C(4)    | 60.1(2)     |
| C(8)-C(1)-C(5)-N(2)   | -144.23(15) | C(25)-C(2)-C(22)-C(23)  | 51.5(2)     |

## 6.7. Compound **13a**

X-ray diffraction data were collected at 100K on a Rigaku Synergy S diffractometer equipped with a HyPix600HE area-detector (kappa geometry, shutterless  $\omega$ -scan technique), using monochromatized Cu  $K_{\alpha}$ -radiation. The intensity data were integrated and corrected for absorption and decay by the CrysAlisPro program.<sup>1</sup> The structure was solved by direct methods using SHELXT<sup>2</sup> and refined on  $F^2$  using SHELXL-2018<sup>3</sup> in the OLEX2 program.<sup>4</sup> Positions of all atoms were found from the electron density-difference map. Atoms were refined with individual anisotropic (non-hydrogen atoms) or isotropic (hydrogen atoms) displacement parameters.

**Table S44.** Crystal data and structure refinement for **13a**.

|                                   |                                                               |                           |
|-----------------------------------|---------------------------------------------------------------|---------------------------|
| Identification code               | <b>13a</b>                                                    |                           |
| Empirical formula                 | C <sub>21</sub> H <sub>20</sub> N <sub>2</sub> O <sub>4</sub> |                           |
| Formula weight                    | 364.39                                                        |                           |
| Temperature                       | 100.0(1) K                                                    |                           |
| Wavelength                        | 1.54184 Å                                                     |                           |
| Crystal system                    | Triclinic                                                     |                           |
| Space group                       | P $\bar{1}$                                                   |                           |
| Unit cell dimensions              | a = 7.48251(7) Å                                              | $\alpha$ = 107.8011(13)°. |
|                                   | b = 8.97191(13) Å                                             | $\beta$ = 96.7797(9)°.    |
|                                   | c = 13.67021(19) Å                                            | $\gamma$ = 98.0759(10)°.  |
| Volume                            | 852.40(2) Å <sup>3</sup>                                      |                           |
| Z                                 | 2                                                             |                           |
| Density (calculated)              | 1.420 g/cm <sup>3</sup>                                       |                           |
| Absorption coefficient            | 0.813 mm <sup>-1</sup>                                        |                           |
| F(000)                            | 384                                                           |                           |
| Crystal size                      | 0.28 x 0.15 x 0.08 mm <sup>3</sup>                            |                           |
| Theta range for data collection   | 3.446 to 79.456°.                                             |                           |
| Index ranges                      | -7 <= h <= 9, -11 <= k <= 11, -17 <= l <= 17                  |                           |
| Reflections collected             | 18947                                                         |                           |
| Independent reflections           | 3679 [R(int) = 0.0308]                                        |                           |
| Observed reflections              | 3503                                                          |                           |
| Completeness to theta = 67.684°   | 100.0 %                                                       |                           |
| Absorption correction             | Analytical                                                    |                           |
| Max. and min. transmission        | 0.947 and 0.845                                               |                           |
| Refinement method                 | Full-matrix least-squares on F <sup>2</sup>                   |                           |
| Data / restraints / parameters    | 3679 / 0 / 325                                                |                           |
| Goodness-of-fit on F <sup>2</sup> | 1.034                                                         |                           |
| Final R indices [I > 2sigma(I)]   | R1 = 0.0377, wR2 = 0.1038                                     |                           |



|                             |                                    |
|-----------------------------|------------------------------------|
| R indices (all data)        | R1 = 0.0389, wR2 = 0.1049          |
| Extinction coefficient      | 0.0025(7)                          |
| Largest diff. peak and hole | 0.344 and -0.240 e.Å <sup>-3</sup> |
| CCDC                        | <b>2233465</b>                     |

---

**Table S45.** Atomic coordinates (x 10<sup>4</sup>) and equivalent isotropic displacement parameters (Å<sup>2</sup>x 10<sup>3</sup>) for **13a**. U(eq) is defined as one third of the trace of the orthogonalized U<sup>ij</sup> tensor.

|       | x        | y       | z       | U(eq) |
|-------|----------|---------|---------|-------|
| O(1)  | 3097(1)  | 1421(1) | 5601(1) | 19(1) |
| O(2)  | 1687(1)  | 3406(1) | 5473(1) | 19(1) |
| O(3)  | 847(1)   | 983(1)  | 4248(1) | 25(1) |
| O(4)  | 3929(1)  | 6736(1) | 6328(1) | 28(1) |
| N(1)  | 547(1)   | 4137(1) | 8620(1) | 18(1) |
| N(2)  | 1866(1)  | 4519(1) | 7295(1) | 16(1) |
| C(1)  | 1793(2)  | 1848(1) | 5033(1) | 19(1) |
| C(2)  | 2908(2)  | 4098(1) | 6472(1) | 16(1) |
| C(3)  | 4058(2)  | 2772(1) | 6493(1) | 17(1) |
| C(4)  | 4297(2)  | 5488(1) | 6377(1) | 20(1) |
| C(5)  | 6000(2)  | 4917(1) | 6245(1) | 22(1) |
| C(6)  | 5883(2)  | 3409(1) | 6236(1) | 20(1) |
| C(7)  | 7303(2)  | 2419(2) | 5956(1) | 27(1) |
| C(8)  | 4154(2)  | 2238(1) | 7472(1) | 17(1) |
| C(9)  | 2185(2)  | 2042(1) | 7703(1) | 18(1) |
| C(10) | 1494(1)  | 3559(1) | 7904(1) | 16(1) |
| C(11) | 204(2)   | 5562(1) | 8485(1) | 17(1) |
| C(12) | -758(2)  | 6642(1) | 9065(1) | 20(1) |
| C(13) | -1004(2) | 7943(1) | 8758(1) | 22(1) |
| C(14) | -324(2)  | 8148(1) | 7885(1) | 21(1) |
| C(15) | 678(2)   | 7104(1) | 7313(1) | 19(1) |
| C(16) | 966(1)   | 5818(1) | 7647(1) | 16(1) |
| C(17) | 4787(2)  | 619(1)  | 7274(1) | 21(1) |
| C(18) | 5056(2)  | 159(1)  | 8267(1) | 24(1) |
| C(19) | 6370(2)  | 1463(2) | 9155(1) | 26(1) |
| C(20) | 5724(2)  | 3058(1) | 9374(1) | 23(1) |
| C(21) | 5484(2)  | 3524(1) | 8385(1) | 19(1) |

---

**Table S46.** Bond lengths [Å] and angles [°] for **13a**.

|             |            |                  |            |
|-------------|------------|------------------|------------|
| O(1)-C(1)   | 1.3449(14) | C(17)-H(17A)     | 0.993(17)  |
| O(1)-C(3)   | 1.4559(13) | C(17)-H(17B)     | 0.994(16)  |
| O(2)-C(1)   | 1.3602(14) | C(17)-C(18)      | 1.5338(17) |
| O(2)-C(2)   | 1.4533(13) | C(18)-H(18A)     | 1.005(16)  |
| O(3)-C(1)   | 1.1887(14) | C(18)-H(18B)     | 1.005(18)  |
| O(4)-C(4)   | 1.2091(15) | C(18)-C(19)      | 1.5282(17) |
| N(1)-C(10)  | 1.2990(15) | C(19)-H(19A)     | 1.001(19)  |
| N(1)-C(11)  | 1.4000(14) | C(19)-H(19B)     | 1.005(17)  |
| N(2)-C(2)   | 1.4305(14) | C(19)-C(20)      | 1.5290(17) |
| N(2)-C(10)  | 1.3921(14) | C(20)-H(20A)     | 0.999(18)  |
| N(2)-C(16)  | 1.4134(14) | C(20)-H(20B)     | 1.013(17)  |
| C(2)-C(3)   | 1.5678(15) | C(20)-C(21)      | 1.5313(16) |
| C(2)-C(4)   | 1.5554(15) | C(21)-H(21A)     | 0.990(16)  |
| C(3)-C(6)   | 1.5262(15) | C(21)-H(21B)     | 0.980(17)  |
| C(3)-C(8)   | 1.5514(15) | C(1)-O(1)-C(3)   | 111.11(8)  |
| C(4)-C(5)   | 1.4489(17) | C(1)-O(2)-C(2)   | 110.56(8)  |
| C(5)-H(5)   | 0.955(18)  | C(10)-N(1)-C(11) | 104.96(9)  |
| C(5)-C(6)   | 1.3392(17) | C(10)-N(2)-C(2)  | 122.25(9)  |
| C(6)-C(7)   | 1.4893(16) | C(10)-N(2)-C(16) | 105.91(9)  |
| C(7)-H(7A)  | 1.01(2)    | C(16)-N(2)-C(2)  | 131.79(9)  |
| C(7)-H(7B)  | 0.982(19)  | O(1)-C(1)-O(2)   | 111.33(9)  |
| C(7)-H(7C)  | 0.987(19)  | O(3)-C(1)-O(1)   | 124.80(10) |
| C(8)-C(9)   | 1.5398(15) | O(3)-C(1)-O(2)   | 123.87(11) |
| C(8)-C(17)  | 1.5464(15) | O(2)-C(2)-C(3)   | 103.05(8)  |
| C(8)-C(21)  | 1.5432(15) | O(2)-C(2)-C(4)   | 106.62(9)  |
| C(9)-H(9A)  | 0.972(15)  | N(2)-C(2)-O(2)   | 110.02(9)  |
| C(9)-H(9B)  | 0.983(17)  | N(2)-C(2)-C(3)   | 115.61(9)  |
| C(9)-C(10)  | 1.4829(15) | N(2)-C(2)-C(4)   | 115.74(9)  |
| C(11)-C(12) | 1.3950(16) | C(4)-C(2)-C(3)   | 104.69(9)  |
| C(11)-C(16) | 1.4036(15) | O(1)-C(3)-C(2)   | 102.84(8)  |
| C(12)-H(12) | 0.965(17)  | O(1)-C(3)-C(6)   | 108.54(9)  |
| C(12)-C(13) | 1.3845(16) | O(1)-C(3)-C(8)   | 107.99(8)  |
| C(13)-H(13) | 0.999(17)  | C(6)-C(3)-C(2)   | 103.11(9)  |
| C(13)-C(14) | 1.4023(17) | C(6)-C(3)-C(8)   | 116.54(9)  |
| C(14)-H(14) | 0.991(18)  | C(8)-C(3)-C(2)   | 116.76(9)  |
| C(14)-C(15) | 1.3924(16) | O(4)-C(4)-C(2)   | 124.97(11) |
| C(15)-H(15) | 0.965(16)  | O(4)-C(4)-C(5)   | 127.97(11) |
| C(15)-C(16) | 1.3973(15) | C(5)-C(4)-C(2)   | 106.73(9)  |

|                   |            |                     |            |
|-------------------|------------|---------------------|------------|
| C(4)-C(5)-H(5)    | 120.8(10)  | C(15)-C(14)-H(14)   | 118.6(10)  |
| C(6)-C(5)-C(4)    | 112.55(10) | C(14)-C(15)-H(15)   | 122.2(9)   |
| C(6)-C(5)-H(5)    | 126.5(10)  | C(14)-C(15)-C(16)   | 116.58(11) |
| C(5)-C(6)-C(3)    | 111.99(10) | C(16)-C(15)-H(15)   | 121.2(9)   |
| C(5)-C(6)-C(7)    | 124.87(11) | C(11)-C(16)-N(2)    | 104.24(9)  |
| C(7)-C(6)-C(3)    | 123.06(10) | C(15)-C(16)-N(2)    | 134.49(10) |
| C(6)-C(7)-H(7A)   | 108.9(12)  | C(15)-C(16)-C(11)   | 121.20(10) |
| C(6)-C(7)-H(7B)   | 109.8(11)  | C(8)-C(17)-H(17A)   | 108.3(10)  |
| C(6)-C(7)-H(7C)   | 110.1(11)  | C(8)-C(17)-H(17B)   | 111.7(9)   |
| H(7A)-C(7)-H(7B)  | 109.2(16)  | H(17A)-C(17)-H(17B) | 106.7(13)  |
| H(7A)-C(7)-H(7C)  | 108.1(16)  | C(18)-C(17)-C(8)    | 112.18(10) |
| H(7B)-C(7)-H(7C)  | 110.7(15)  | C(18)-C(17)-H(17A)  | 110.8(10)  |
| C(9)-C(8)-C(3)    | 105.85(9)  | C(18)-C(17)-H(17B)  | 107.0(9)   |
| C(9)-C(8)-C(17)   | 108.51(9)  | C(17)-C(18)-H(18A)  | 109.4(9)   |
| C(9)-C(8)-C(21)   | 111.63(9)  | C(17)-C(18)-H(18B)  | 106.8(10)  |
| C(17)-C(8)-C(3)   | 111.96(9)  | H(18A)-C(18)-H(18B) | 107.9(13)  |
| C(21)-C(8)-C(3)   | 109.17(9)  | C(19)-C(18)-C(17)   | 111.70(10) |
| C(21)-C(8)-C(17)  | 109.70(9)  | C(19)-C(18)-H(18A)  | 110.1(9)   |
| C(8)-C(9)-H(9A)   | 108.6(9)   | C(19)-C(18)-H(18B)  | 110.8(10)  |
| C(8)-C(9)-H(9B)   | 112.6(9)   | C(18)-C(19)-H(19A)  | 112.0(10)  |
| H(9A)-C(9)-H(9B)  | 107.6(13)  | C(18)-C(19)-H(19B)  | 109.3(9)   |
| C(10)-C(9)-C(8)   | 111.28(9)  | C(18)-C(19)-C(20)   | 111.11(10) |
| C(10)-C(9)-H(9A)  | 109.8(9)   | H(19A)-C(19)-H(19B) | 106.8(14)  |
| C(10)-C(9)-H(9B)  | 106.9(10)  | C(20)-C(19)-H(19A)  | 108.8(10)  |
| N(1)-C(10)-N(2)   | 113.78(10) | C(20)-C(19)-H(19B)  | 108.6(10)  |
| N(1)-C(10)-C(9)   | 126.50(10) | C(19)-C(20)-H(20A)  | 109.3(10)  |
| N(2)-C(10)-C(9)   | 119.72(10) | C(19)-C(20)-H(20B)  | 110.7(10)  |
| N(1)-C(11)-C(16)  | 111.00(10) | C(19)-C(20)-C(21)   | 110.68(10) |
| C(12)-C(11)-N(1)  | 127.64(10) | H(20A)-C(20)-H(20B) | 105.5(13)  |
| C(12)-C(11)-C(16) | 121.36(10) | C(21)-C(20)-H(20A)  | 109.5(10)  |
| C(11)-C(12)-H(12) | 121.6(10)  | C(21)-C(20)-H(20B)  | 111.0(10)  |
| C(13)-C(12)-C(11) | 117.64(11) | C(8)-C(21)-H(21A)   | 107.5(9)   |
| C(13)-C(12)-H(12) | 120.7(10)  | C(8)-C(21)-H(21B)   | 110.1(9)   |
| C(12)-C(13)-H(13) | 119.6(10)  | C(20)-C(21)-C(8)    | 112.65(9)  |
| C(12)-C(13)-C(14) | 120.74(11) | C(20)-C(21)-H(21A)  | 108.1(9)   |
| C(14)-C(13)-H(13) | 119.7(10)  | C(20)-C(21)-H(21B)  | 109.8(9)   |
| C(13)-C(14)-H(14) | 119.1(10)  | H(21A)-C(21)-H(21B) | 108.6(13)  |
| C(15)-C(14)-C(13) | 122.33(11) |                     |            |

**Table S47.** Anisotropic displacement parameters ( $\text{\AA}^2 \times 10^3$ ) for **13a**. The anisotropic displacement factor exponent takes the form:  $-2\pi^2[h^2 a^{*2}U^{11} + \dots + 2 h k a^* b^* U^{12}]$

|       | $U^{11}$ | $U^{22}$ | $U^{33}$ | $U^{23}$ | $U^{13}$ | $U^{12}$ |
|-------|----------|----------|----------|----------|----------|----------|
| O(1)  | 21(1)    | 14(1)    | 19(1)    | 2(1)     | -2(1)    | 2(1)     |
| O(2)  | 21(1)    | 16(1)    | 18(1)    | 5(1)     | 1(1)     | 3(1)     |
| O(3)  | 28(1)    | 20(1)    | 20(1)    | 4(1)     | -4(1)    | 0(1)     |
| O(4)  | 34(1)    | 16(1)    | 40(1)    | 11(1)    | 16(1)    | 6(1)     |
| N(1)  | 18(1)    | 17(1)    | 19(1)    | 7(1)     | 1(1)     | 2(1)     |
| N(2)  | 17(1)    | 14(1)    | 19(1)    | 6(1)     | 3(1)     | 3(1)     |
| C(1)  | 20(1)    | 17(1)    | 19(1)    | 6(1)     | 2(1)     | 2(1)     |
| C(2)  | 17(1)    | 14(1)    | 17(1)    | 4(1)     | 2(1)     | 2(1)     |
| C(3)  | 16(1)    | 12(1)    | 18(1)    | 1(1)     | 0(1)     | 1(1)     |
| C(4)  | 23(1)    | 15(1)    | 19(1)    | 3(1)     | 5(1)     | 0(1)     |
| C(5)  | 19(1)    | 21(1)    | 23(1)    | 5(1)     | 3(1)     | -1(1)    |
| C(6)  | 18(1)    | 21(1)    | 18(1)    | 3(1)     | 1(1)     | 2(1)     |
| C(7)  | 21(1)    | 27(1)    | 31(1)    | 7(1)     | 6(1)     | 7(1)     |
| C(8)  | 17(1)    | 13(1)    | 19(1)    | 4(1)     | -1(1)    | 3(1)     |
| C(9)  | 18(1)    | 14(1)    | 21(1)    | 6(1)     | 0(1)     | 1(1)     |
| C(10) | 15(1)    | 15(1)    | 18(1)    | 6(1)     | -1(1)    | 0(1)     |
| C(11) | 16(1)    | 16(1)    | 18(1)    | 5(1)     | 0(1)     | 2(1)     |
| C(12) | 20(1)    | 22(1)    | 18(1)    | 6(1)     | 3(1)     | 4(1)     |
| C(13) | 21(1)    | 19(1)    | 23(1)    | 4(1)     | 2(1)     | 6(1)     |
| C(14) | 21(1)    | 16(1)    | 26(1)    | 7(1)     | 2(1)     | 4(1)     |
| C(15) | 19(1)    | 17(1)    | 22(1)    | 8(1)     | 2(1)     | 3(1)     |
| C(16) | 15(1)    | 14(1)    | 18(1)    | 4(1)     | 1(1)     | 3(1)     |
| C(17) | 23(1)    | 15(1)    | 23(1)    | 4(1)     | -2(1)    | 5(1)     |
| C(18) | 27(1)    | 17(1)    | 27(1)    | 7(1)     | -3(1)    | 6(1)     |
| C(19) | 27(1)    | 22(1)    | 26(1)    | 8(1)     | -5(1)    | 6(1)     |
| C(20) | 25(1)    | 20(1)    | 21(1)    | 4(1)     | -3(1)    | 3(1)     |
| C(21) | 18(1)    | 14(1)    | 21(1)    | 3(1)     | -1(1)    | 1(1)     |

**Table S48.** Hydrogen coordinates ( $\times 10^4$ ) and isotropic displacement parameters ( $\text{\AA}^2 \times 10^{-3}$ ) for **13a**.

|        | x         | y        | z        | U(eq) |
|--------|-----------|----------|----------|-------|
| H(5)   | 7030(20)  | 5560(20) | 6130(13) | 30(4) |
| H(7A)  | 8180(30)  | 2950(30) | 5609(17) | 51(5) |
| H(7B)  | 6720(20)  | 1360(20) | 5473(14) | 36(4) |
| H(7C)  | 8000(20)  | 2340(20) | 6591(15) | 36(4) |
| H(9A)  | 1400(20)  | 1226(18) | 7108(12) | 20(3) |
| H(9B)  | 2090(20)  | 1710(20) | 8318(13) | 26(4) |
| H(12)  | -1200(20) | 6515(19) | 9676(13) | 24(4) |
| H(13)  | -1680(20) | 8740(20) | 9161(13) | 30(4) |
| H(14)  | -560(20)  | 9070(20) | 7668(13) | 31(4) |
| H(15)  | 1130(20)  | 7237(19) | 6706(13) | 23(4) |
| H(17A) | 3870(20)  | -200(20) | 6721(13) | 27(4) |
| H(17B) | 5970(20)  | 633(19)  | 7012(12) | 24(4) |
| H(18A) | 3840(20)  | -62(19)  | 8484(12) | 25(4) |
| H(18B) | 5550(20)  | -860(20) | 8080(13) | 31(4) |
| H(19A) | 6510(20)  | 1190(20) | 9813(14) | 34(4) |
| H(19B) | 7620(20)  | 1590(20) | 8957(13) | 27(4) |
| H(20A) | 6650(20)  | 3900(20) | 9927(13) | 29(4) |
| H(20B) | 4550(20)  | 3020(20) | 9672(13) | 29(4) |
| H(21A) | 6690(20)  | 3655(18) | 8164(12) | 20(3) |
| H(21B) | 5060(20)  | 4540(20) | 8535(12) | 24(4) |

**Table S49.** Torsion angles [ $^\circ$ ] for **13a**.

|                      |             |                        |             |
|----------------------|-------------|------------------------|-------------|
| O(1)-C(3)-C(6)-C(5)  | 118.29(11)  | O(4)-C(4)-C(5)-C(6)    | -173.16(12) |
| O(1)-C(3)-C(6)-C(7)  | -58.71(14)  | N(1)-C(11)-C(12)-C(13) | -176.96(11) |
| O(1)-C(3)-C(8)-C(9)  | -70.81(10)  | N(1)-C(11)-C(16)-N(2)  | -2.39(12)   |
| O(1)-C(3)-C(8)-C(17) | 47.24(11)   | N(1)-C(11)-C(16)-C(15) | 175.01(10)  |
| O(1)-C(3)-C(8)-C(21) | 168.91(8)   | N(2)-C(2)-C(3)-O(1)    | 109.92(10)  |
| O(2)-C(2)-C(3)-O(1)  | -10.14(10)  | N(2)-C(2)-C(3)-C(6)    | -137.26(9)  |
| O(2)-C(2)-C(3)-C(6)  | 102.69(9)   | N(2)-C(2)-C(3)-C(8)    | -8.10(13)   |
| O(2)-C(2)-C(3)-C(8)  | -128.16(9)  | N(2)-C(2)-C(4)-O(4)    | -52.14(16)  |
| O(2)-C(2)-C(4)-O(4)  | 70.59(14)   | N(2)-C(2)-C(4)-C(5)    | 134.01(10)  |
| O(2)-C(2)-C(4)-C(5)  | -103.27(10) | C(1)-O(1)-C(3)-C(2)    | 8.00(11)    |

|                       |             |                         |             |
|-----------------------|-------------|-------------------------|-------------|
| C(1)-O(1)-C(3)-C(6)   | -100.78(10) | C(8)-C(9)-C(10)-N(1)    | -138.33(11) |
| C(1)-O(1)-C(3)-C(8)   | 132.03(9)   | C(8)-C(9)-C(10)-N(2)    | 41.04(13)   |
| C(1)-O(2)-C(2)-N(2)   | -114.35(10) | C(8)-C(17)-C(18)-C(19)  | -54.87(13)  |
| C(1)-O(2)-C(2)-C(3)   | 9.47(11)    | C(9)-C(8)-C(17)-C(18)   | -68.86(12)  |
| C(1)-O(2)-C(2)-C(4)   | 119.40(9)   | C(9)-C(8)-C(21)-C(20)   | 65.81(12)   |
| C(2)-O(2)-C(1)-O(1)   | -4.98(12)   | C(10)-N(1)-C(11)-C(12)  | -179.65(11) |
| C(2)-O(2)-C(1)-O(3)   | 174.95(11)  | C(10)-N(1)-C(11)-C(16)  | 0.65(12)    |
| C(2)-N(2)-C(10)-N(1)  | 179.34(9)   | C(10)-N(2)-C(2)-O(2)    | 99.63(11)   |
| C(2)-N(2)-C(10)-C(9)  | -0.11(15)   | C(10)-N(2)-C(2)-C(3)    | -16.54(14)  |
| C(2)-N(2)-C(16)-C(11) | -179.57(11) | C(10)-N(2)-C(2)-C(4)    | -139.45(10) |
| C(2)-N(2)-C(16)-C(15) | 3.5(2)      | C(10)-N(2)-C(16)-C(11)  | 3.08(11)    |
| C(2)-C(3)-C(6)-C(5)   | 9.69(13)    | C(10)-N(2)-C(16)-C(15)  | -173.80(12) |
| C(2)-C(3)-C(6)-C(7)   | -167.30(11) | C(11)-N(1)-C(10)-N(2)   | 1.48(12)    |
| C(2)-C(3)-C(8)-C(9)   | 44.38(12)   | C(11)-N(1)-C(10)-C(9)   | -179.12(10) |
| C(2)-C(3)-C(8)-C(17)  | 162.43(9)   | C(11)-C(12)-C(13)-C(14) | 0.78(17)    |
| C(2)-C(3)-C(8)-C(21)  | -75.91(11)  | C(12)-C(11)-C(16)-N(2)  | 177.89(10)  |
| C(2)-C(4)-C(5)-C(6)   | 0.45(14)    | C(12)-C(11)-C(16)-C(15) | -4.72(17)   |
| C(3)-O(1)-C(1)-O(2)   | -2.43(12)   | C(12)-C(13)-C(14)-C(15) | -2.48(18)   |
| C(3)-O(1)-C(1)-O(3)   | 177.65(11)  | C(13)-C(14)-C(15)-C(16) | 0.57(17)    |
| C(3)-C(2)-C(4)-O(4)   | 179.36(11)  | C(14)-C(15)-C(16)-N(2)  | 179.41(11)  |
| C(3)-C(2)-C(4)-C(5)   | 5.51(12)    | C(14)-C(15)-C(16)-C(11) | 2.95(16)    |
| C(3)-C(8)-C(9)-C(10)  | -59.82(11)  | C(16)-N(2)-C(2)-O(2)    | -77.35(13)  |
| C(3)-C(8)-C(17)-C(18) | 174.69(9)   | C(16)-N(2)-C(2)-C(3)    | 166.48(10)  |
| C(3)-C(8)-C(21)-C(20) | -177.52(9)  | C(16)-N(2)-C(2)-C(4)    | 43.57(16)   |
| C(4)-C(2)-C(3)-O(1)   | -121.50(9)  | C(16)-N(2)-C(10)-N(1)   | -3.00(12)   |
| C(4)-C(2)-C(3)-C(6)   | -8.68(11)   | C(16)-N(2)-C(10)-C(9)   | 177.55(9)   |
| C(4)-C(2)-C(3)-C(8)   | 120.48(10)  | C(16)-C(11)-C(12)-C(13) | 2.72(17)    |
| C(4)-C(5)-C(6)-C(3)   | -6.65(15)   | C(17)-C(8)-C(9)-C(10)   | 179.86(9)   |
| C(4)-C(5)-C(6)-C(7)   | 170.29(11)  | C(17)-C(8)-C(21)-C(20)  | -54.50(13)  |
| C(6)-C(3)-C(8)-C(9)   | 166.79(9)   | C(17)-C(18)-C(19)-C(20) | 55.64(14)   |
| C(6)-C(3)-C(8)-C(17)  | -75.16(12)  | C(18)-C(19)-C(20)-C(21) | -55.95(14)  |
| C(6)-C(3)-C(8)-C(21)  | 46.50(12)   | C(19)-C(20)-C(21)-C(8)  | 56.37(13)   |
| C(8)-C(3)-C(6)-C(5)   | -119.60(11) | C(21)-C(8)-C(9)-C(10)   | 58.85(12)   |
| C(8)-C(3)-C(6)-C(7)   | 63.41(14)   | C(21)-C(8)-C(17)-C(18)  | 53.33(13)   |

## 7. References

1. CrysAlisPro. Version 1.171.41. *Rigaku Oxford Diffraction*, **2021**.
2. Sheldrick, G. M. SHELXT - Integrated space-group and crystal-structure determination. *Acta Cryst.* **2015**, A71(1), 3-8.
3. Sheldrick, G. M. Crystal structure refinement with SHELXL. *Acta Cryst.* **2015**, C71, 1, 3-8.
4. Dolomanov O.V.; Bourhis L.J.; Gildea R.J.; Howard J.A.K.; Puschmann H. OLEX2: a complete structure solution, refinement and analysis program. *J. Appl. Cryst.* **2009**, 42, 2, 229-341.
